# Supplementary material for: The extensive solid-form landscape of sulfathiazole: hydrogen-bond topology and node shape
Source: Royal Society of Chemistry journal article supplement (doi:10.1039/d2ce00964a), 2022-01-01
Supplement: d2ce00964a5.xlsx [file d2ce00964a5.xlsx]

## Sheet: ALL
		1p_DFT_01	1p_DFT_02	2p_DFT_01	2p_DFT_02	3p_DFT_01	3p_DFT_02	4p_DFT_01	5p_DFT_01	1_SLFZ_01	1_SLFZ_02	2_SLFZ_01	3_SLFZ_01	3_SLFZ_02	4_SLFZ_01	4_SLFZ_02	5_SLFZ_01	6_SLFZ_01	7_SLFZ_01	8_SLFZ_01	9_SLFZ_01	10_SLFZ_01	11_SLFZ_01	12_SLFZ_01	13_SLFZ_01	14_SLFZ_01	15_SLFZ_01	16_SLFZ_01	17_SLFZ_01	18_SLFZ_01	19_SLFZ_01	20_SLFZ_01	20_SLFZ_02	21_SLFZ_01	22_SLFZ_01	23_SLFZ_01	23_SLFZ_02	24_SLFZ_01	25_SLFZ_01	25_SLFZ_02	28_SLFZ_01	29_SLFZ_01	30_SLFZ_01	31_SLFZ_01	32_SLFZ_01	33_SLFZ_01	34_SLFZ_01	35_SLFZ_01	35_SLFZ_02
		6	4	6	6	4	4	4	4	5	4	4	5	5	5	5	3	5	3	5	3	6	5	5	5	5	5	5	5	5	5	6	5	5	5	5	4	3	5	5	5	5	5	5	5	5	5	5	5
1p_DFT_01	6		5.2518	18.4287	20.422	3.9543	4.0403	4.4972	3.5108	9.4012	11.0589	1.7851	6.4507	9.3594	3.8778	9.0954	1.2936	6.6658	0.863	4.0732	0.6205	13.4763	3.9509	3.3939	4.554	5.2885	4.6393	8.7677	8.6963	3.691	7.0836	14.2903	5.6334	3.7342	4.1853	2.626	4.552	1.1209	9.702	6.8404	3.553	4.4552	4.3666	3.8531	4.3943	5.3221	3.6937	4.1047	5.3653
1p_DFT_02	4	5.2518		7.5718	7.655	22.4054	20.5877	21.0947	21.8023	13.6588	18.9248	20.684	7.2235	7.5286	6.0182	5.5333	2.6411	9.5141	4.0715	9.5653	3.813	9.5204	10.3079	10.6643	10.3628	10.5958	10.1173	3.992	4.3472	10.294	4.4436	4.9934	4.6421	10.1141	9.8009	13.2611	16.4339	6.5951	5.1547	5.6374	11.3576	10.8986	9.9074	10.8278	10.221	8.3549	7.6103	10.5549	4.7068
2p_DFT_01	6	18.4287	7.5718		0.5459	7.1764	7.6583	7.8584	6.6165	17.4979	5.1583	5.2917	8.2503	10.0277	6.8515	7.3192	3.2608	12.351	4.1216	11.7352	4.5143	19.9722	11.7277	13.1084	11.8042	10.2638	10.8409	13.3543	13.4856	12.9662	15.5569	18.3496	11.1627	13.2049	12.6915	14.168	5.4904	1.5967	8.6085	6.8846	12.7519	11.8207	14.3819	12.3847	12.6443	14.3003	14.2481	11.6414	11.4456
2p_DFT_02	6	20.422	7.655	0.5459		7.2977	7.3625	7.9623	6.1827	16.8304	5.2727	5.9105	7.2155	9.5681	6.647	7.1848	3.4928	10.9603	4.3558	11.623	4.8558	19.9104	11.7352	12.8032	11.7389	10.0652	10.861	12.2681	12.4233	12.3359	13.674	18.8703	11.7661	12.0987	12.6097	13.184	4.5421	1.8157	6.494	6.8832	11.9642	11.814	14.0847	12.4439	12.2785	12.8794	12.7601	11.5647	11.9942
3p_DFT_01	4	3.9543	22.4054	7.1764	7.2977		0.1684	0.0926	0.1511	11.4032	10.9117	3.1928	12.8261	13.4243	12.9938	12.2645	7.0497	11.883	0.9273	5.8196	5.7979	12.7093	5.6724	5.5264	6.0479	6.6992	5.5696	13.493	13.1725	5.4355	15.3977	3.2603	7.3215	5.201	5.3934	2.0864	3.4059	4.988	13.8736	13.1766	5.677	5.7738	5.6769	5.9138	6.0118	6.5104	5.7075	5.6629	5.4461
3p_DFT_02	4	4.0403	20.5877	7.6583	7.3625	0.1684		0.0787	0.1356	10.8734	12.8292	3.5917	11.7024	13.8068	12.7092	12.4643	7.8711	11.256	0.9588	6.0948	5.6896	12.6772	5.8376	5.5502	6.231	7.0533	5.9838	12.4382	12.1437	5.5046	14.1732	3.5509	8.7527	5.2865	5.5995	2.0383	3.0358	5.1703	13.7988	13.8912	5.6322	5.9269	5.7773	5.95	6.2041	6.6833	5.7677	5.8483	6.4923
4p_DFT_01	4	4.4972	21.0947	7.8584	7.9623	0.0926	0.0787		0.2712	11.3246	11.672	3.4813	12.107	14.2009	13.0477	12.9969	8.0375	11.8712	1.1019	6.0161	6.5655	13.1021	5.7998	5.6028	6.204	6.9616	5.8427	12.8807	12.6002	5.5161	14.63	3.6894	8.3008	5.2788	5.5549	2.4536	3.0003	5.0056	13.6219	13.7495	5.6997	5.9183	5.8157	5.9862	6.2105	6.6917	5.8273	5.8276	6.1653
5p_DFT_01	4	3.5108	21.8023	6.6165	6.1827	0.1511	0.1356	0.2712		10.6539	12.257	3.4856	12.6159	13.1989	13.5796	11.8546	8.0104	11.2865	1.032	6.1184	4.7414	12.497	5.8843	5.6324	6.2515	7.014	5.9404	13.2517	12.9096	5.5756	14.049	3.3161	8.05	5.3572	5.6284	1.571	3.8227	5.5734	13.9038	12.7964	5.7361	5.9487	5.798	6.0178	6.2033	6.6658	5.8194	5.8682	6.0914
1_SLFZ_01	5	9.4012	13.6588	17.4979	16.8304	11.4032	10.8734	11.3246	10.6539		16.9918	8.6587	20.002	19.6962	18.5543	18.9241	4.7272	21.8059	4.9859	21.6703	3.4609	14.3715	21.5033	20.6006	22.194	23.2777	22.1711	9.3007	8.8896	20.9541	11.3188	12.3704	22.8796	20.9243	21.5656	12.7937	6.3807	3.9293	22.9479	22.9276	20.9226	22.032	21.2393	21.2726	21.6855	21.8243	19.9393	21.7474	21.5129
1_SLFZ_02	4	11.0589	18.9248	5.1583	5.2727	10.9117	12.8292	11.672	12.257	16.9918		13.322	13.9408	13.5229	14.8057	12.7231	7.694	9.9663	5.9014	10.166	10.3623	9.1182	10.6427	10.6658	11.287	11.7869	10.0196	7.7772	7.6105	10.3254	7.3816	8.5108	9.0784	9.8413	9.9253	10.5087	12.294	8.5927	9.5254	9.0354	11.15	11.2833	10.4356	11.3581	11.1155	10.3861	9.5569	11.1433	7.3187
2_SLFZ_01	4	1.7851	20.684	5.2917	5.9105	3.1928	3.5917	3.4813	3.4856	8.6587	13.322		9.8497	10.6602	8.107	7.8505	4.109	10.1396	0.0869	1.4037	3.2179	5.1454	1.3897	1.4712	1.9848	2.0691	1.2263	7.0989	6.8314	1.5487	8.5807	6.0028	4.8919	1.4883	1.6465	4.947	4.1773	2.0559	9.2189	8.4139	1.6367	1.8384	2.4071	1.7688	2.0636	3.4364	2.1223	1.5332	1.7388
3_SLFZ_01	5	6.4507	7.2235	8.2503	7.2155	12.8261	11.7024	12.107	12.6159	20.002	13.9408	9.8497		3.456	1.3482	4.0842	1.8671	4.9163	0.5654	8.905	2.9889	9.383	9.7769	10.7397	9.9828	8.6086	8.2256	18.1186	17.8873	10.735	16.0824	7.534	5.2267	10.839	9.9193	18.0238	10.2071	4.1053	8.0661	7.6437	11.3142	10.1934	11.2169	10.8258	9.9321	11.1432	11.9455	9.6067	8.382
3_SLFZ_02	5	9.3594	7.5286	10.0277	9.5681	13.4243	13.8068	14.2009	13.1989	19.6962	13.5229	10.6602	3.456		3.2001	1.1423	2.5644	2.1206	0.5654	8.5322	3.0586	9.3027	8.2058	7.3146	7.3889	8.5406	9.2343	15.7546	16.0171	7.4614	15.7671	6.5834	8.3941	7.7592	8.1874	13.9952	11.1961	4.1857	9.9756	9.9351	6.8612	7.2812	6.6499	6.8574	7.4025	6.7788	6.7632	7.7462	10.692
4_SLFZ_01	5	3.8778	6.0182	6.8515	6.647	12.9938	12.7092	13.0477	13.5796	18.5543	14.8057	8.107	1.3482	3.2001		3.2179	1.8429	4.4117	0.2218	7.66	2.8756	7.9964	8.1425	8.9989	8.7398	7.6799	7.0079	14.002	14.0108	9.0823	14.0563	4.8127	5.5864	9.1229	8.7273	14.1759	9.5106	2.4951	10.1452	9.043	8.2768	8.7396	9.0569	8.3342	9.0768	10.0474	10.115	8.3781	8.4899
4_SLFZ_02	5	9.0954	5.5333	7.3192	7.1848	12.2645	12.4643	12.9969	11.8546	18.9241	12.7231	7.8505	4.0842	1.1423	3.2179		1.9444	2.7052	0.2062	9.1192	3.0669	8.4334	9.0199	7.9741	8.4323	9.6455	9.5846	16.427	16.1619	8.2914	15.6624	6.0797	6.1558	8.5978	9.0726	12.1034	11.2621	2.7519	10.1799	10.1007	7.5115	8.1986	7.6979	7.7296	8.3365	8.2861	7.5991	8.6153	8.7489
5_SLFZ_01	3	1.2936	2.6411	3.2608	3.4928	7.0497	7.8711	8.0375	8.0104	4.7272	7.694	4.109	1.8671	2.5644	1.8429	1.9444		2.1132	3.9563	0.5677	10.1684	8.0341	0.5895	0.701	0.3427	0.328	0.7576	2.0599	2.2263	0.5733	3.1167	0.4021	0.4021	0.5988	0.4862	2.3922	7.0405	16.0942	3.1971	2.5724	0.6622	0.4303	0.3498	0.5115	0.4371	0.1349	0.4501	0.4603	0.4603
6_SLFZ_01	5	6.6658	9.5141	12.351	10.9603	11.883	11.256	11.8712	11.2865	21.8059	9.9663	10.1396	4.9163	2.1206	4.4117	2.7052	2.1132		0.102	7.3313	3.3681	12.046	6.9823	6.351	5.7281	5.9678	8.0758	14.4335	14.39	6.6016	13.3568	5.1791	9.7348	7.036	6.6418	11.2794	9.9371	4.8117	7.7773	8.2182	6.2445	5.6839	5.3078	5.946	5.3946	5.6389	7.1871	6.0342	8.5906
7_SLFZ_01	3	0.863	4.0715	4.1216	4.3558	0.9273	0.9588	1.1019	1.032	4.9859	5.9014	0.0869	0.5654	0.5654	0.2218	0.2062	3.9563	0.102		0.1704	4.1606	5.1808	0.0361	0.1087	0.023	0.2904	0.2482	4.9343	4.9942	0.0408	5.8648	0.1488	0.7988	0.0355	0.0371	2.3865	1.6316	8.2478	3.2053	3.9754	0.2027	0.0063	0.0196	0.064	0.1206	0.1988	0.0194	0.0466	0.0466
8_SLFZ_01	5	4.0732	9.5653	11.7352	11.623	5.8196	6.0948	6.0161	6.1184	21.6703	10.166	1.4037	8.905	8.5322	7.66	9.1192	0.5677	7.3313	0.1704		1.5071	10.9086	0.0828	0.1803	0.1606	0.2548	0.0731	10.3481	10.4236	0.1598	8.7703	2.8572	6.8124	0.1863	0.0639	7.8797	5.6905	1.7333	6.3159	8.3174	0.3576	0.1702	0.3876	0.2463	0.1809	1.0682	0.9238	0.0923	4.4326
9_SLFZ_01	3	0.6205	3.813	4.5143	4.8558	5.7979	5.6896	6.5655	4.7414	3.4609	10.3623	3.2179	2.9889	3.0586	2.8756	3.0669	10.1684	3.3681	4.1606	1.5071		1.305	1.5463	1.4552	1.0257	0.7691	1.502	0.0956	0.1248	1.6349	0.4597	1.9555	2.3521	1.8517	1.3708	1.9766	3.601	1.47	2.7229	1.9611	1.5587	0.9497	1.5091	1.3913	0.9214	2.0053	1.3351	1.0087	0.8206
10_SLFZ_01	6	13.4763	9.5204	19.9722	19.9104	12.7093	12.6772	13.1021	12.497	14.3715	9.1182	5.1454	9.383	9.3027	7.9964	8.4334	8.0341	12.046	5.1808	10.9086	1.305		10.7882	11.0402	11.1335	9.8877	10.1386	11.7795	12.0416	11.0662	11.0323	18.6788	12.3618	11.1929	11.473	13.0566	8.7331	1.9952	6.7619	7.4388	10.8928	11.1423	11.9611	10.7976	11.4795	12.8676	12.4889	10.9572	12.9916
11_SLFZ_01	5	3.9509	10.3079	11.7277	11.7352	5.6724	5.8376	5.7998	5.8843	21.5033	10.6427	1.3897	9.7769	8.2058	8.1425	9.0199	0.5895	6.9823	0.0361	0.0828	1.5463	10.7882		0.0783	0.1236	0.3254	0.1853	10.7576	10.8066	0.0494	9.2611	3.4222	7.8149	0.0788	0.1065	7.4979	5.8832	1.2418	7.0979	9.1618	0.118	0.0943	0.4237	0.0706	0.2589	1.2414	1.0859	0.0619	5.2771
12_SLFZ_01	5	3.3939	10.6643	13.1084	12.8032	5.5264	5.5502	5.6028	5.6324	20.6006	10.6658	1.4712	10.7397	7.3146	8.9989	7.9741	0.701	6.351	0.1087	0.1803	1.4552	11.0402	0.0783		0.2009	0.5211	0.3899	10.3181	10.3226	0.0334	8.7762	3.4019	8.2748	0.0777	0.15	7.3083	5.3742	1.096	7.4819	9.0082	0.0647	0.1545	0.3333	0.0627	0.2462	1.1428	0.852	0.1175	5.3163
13_SLFZ_01	5	4.554	10.3628	11.8042	11.7389	6.0479	6.231	6.204	6.2515	22.194	11.287	1.9848	9.9828	7.3889	8.7398	8.4323	0.3427	5.7281	0.023	0.1606	1.0257	11.1335	0.1236	0.2009		0.1359	0.3144	10.789	10.8877	0.1498	9.2726	2.893	8.3245	0.2154	0.0939	7.8832	6.191	1.7468	6.1562	8.4643	0.2693	0.0126	0.2083	0.1113	0.081	0.8078	1.0117	0.0369	5.5165
14_SLFZ_01	5	5.2885	10.5958	10.2638	10.0652	6.6992	7.0533	6.9616	7.014	23.2777	11.7869	2.0691	8.6086	8.5406	7.6799	9.6455	0.328	5.9678	0.2904	0.2548	0.7691	9.8877	0.3254	0.5211	0.1359		0.2935	10.7814	10.9293	0.4944	9.0919	2.8012	7.7937	0.6038	0.307	8.1118	6.5717	2.13	5.0324	8.8777	0.6355	0.1668	0.5412	0.4052	0.188	1.2081	1.595	0.1537	5.7511
15_SLFZ_01	5	4.6393	10.1173	10.8409	10.861	5.5696	5.9838	5.8427	5.9404	22.1711	10.0196	1.2263	8.2256	9.2343	7.0079	9.5846	0.7576	8.0758	0.2482	0.0731	1.502	10.1386	0.1853	0.3899	0.3144	0.2935		10.4821	10.5588	0.3503	8.749	2.9649	6.3523	0.3624	0.1985	7.4943	5.7868	1.3956	6.0876	9.0592	0.5696	0.3083	0.6761	0.4537	0.3637	1.4688	1.3728	0.2123	4.4821
16_SLFZ_01	5	8.7677	3.992	13.3543	12.2681	13.493	12.4382	12.8807	13.2517	9.3007	7.7772	7.0989	18.1186	15.7546	14.002	16.427	2.0599	14.4335	4.9343	10.3481	0.0956	11.7795	10.7576	10.3181	10.789	10.7814	10.4821		0.0205	10.6866	0.2991	9.0408	12.0353	10.8331	10.4784	11.7762	8.9671	0.1762	8.2701	9.9644	10.9372	10.7513	10.3875	10.8418	10.0655	10.9546	10.1062	10.4777	11.2444
17_SLFZ_01	5	8.6963	4.3472	13.4856	12.4233	13.1725	12.1437	12.6002	12.9096	8.8896	7.6105	6.8314	17.8873	16.0171	14.0108	16.1619	2.2263	14.39	4.9942	10.4236	0.1248	12.0416	10.8066	10.3226	10.8877	10.9293	10.5588	0.0205		10.713	0.3389	8.953	12.3297	10.8546	10.5452	11.3715	8.7693	0.1854	8.6919	10.283	10.9349	10.8262	10.4591	10.8821	10.151	11.0978	10.2479	10.5506	11.4433
18_SLFZ_01	5	3.691	10.294	12.9662	12.3359	5.4355	5.5046	5.5161	5.5756	20.9541	10.3254	1.5487	10.735	7.4614	9.0823	8.2914	0.5733	6.6016	0.0408	0.1598	1.6349	11.0662	0.0494	0.0334	0.1498	0.4944	0.3503	10.6866	10.713		9.1716	3.3572	8.2359	0.0146	0.0929	7.5485	5.6777	1.2427	7.5623	8.7317	0.0809	0.121	0.2743	0.0495	0.2521	0.9855	0.7812	0.1137	5.1672
19_SLFZ_01	5	7.0836	4.4436	15.5569	13.674	15.3977	14.1732	14.63	14.049	11.3188	7.3816	8.5807	16.0824	15.7671	14.0563	15.6624	3.1167	13.3568	5.8648	8.7703	0.4597	11.0323	9.2611	8.7762	9.2726	9.0919	8.749	0.2991	0.3389	9.1716		9.1071	9.8131	9.2618	8.9505	11.0396	7.9833	0.6258	6.349	7.9328	9.4721	9.2253	8.9823	9.461	8.5315	9.275	7.8306	8.9123	9.5006
20_SLFZ_01	6	14.2903	4.9934	18.3496	18.8703	3.2603	3.5509	3.6894	3.3161	12.3704	8.5108	6.0028	7.534	6.5834	4.8127	6.0797	0.4021	5.1791	0.1488	2.8572	1.9555	18.6788	3.4222	3.4019	2.893	2.8012	2.9649	9.0408	8.953	3.3572	9.1071		7.1623	3.3976	2.6658	7.8229	3.559	1.9016	6.4913	5.3977	4.0411	3.0427	2.3883	3.5954	2.3881	2.187	2.7142	3.108	4.5592
20_SLFZ_02	5	5.6334	4.6421	11.1627	11.7661	7.3215	8.7527	8.3008	8.05	22.8796	9.0784	4.8919	5.2267	8.3941	5.5864	6.1558	0.4021	9.7348	0.7988	6.8124	2.3521	12.3618	7.8149	8.2748	8.3245	7.7937	6.3523	12.0353	12.3297	8.2359	9.8131	7.1623		8.0915	7.4615	12.8959	9.7641	1.3451	9.718	10.3662	9.1943	8.5042	8.4885	8.8803	7.9054	8.6479	7.6699	7.889	1.9753
21_SLFZ_01	5	3.7342	10.1141	13.2049	12.0987	5.201	5.2865	5.2788	5.3572	20.9243	9.8413	1.4883	10.839	7.7592	9.1229	8.5978	0.5988	7.036	0.0355	0.1863	1.8517	11.1929	0.0788	0.0777	0.2154	0.6038	0.3624	10.8331	10.8546	0.0146	9.2618	3.3976	8.0915		0.1043	7.6024	5.6503	1.3214	7.8536	8.6288	0.1319	0.1886	0.3056	0.1075	0.3338	0.9802	0.731	0.1831	4.9353
22_SLFZ_01	5	4.1853	9.8009	12.6915	12.6097	5.3934	5.5995	5.5549	5.6284	21.5656	9.9253	1.6465	9.9193	8.1874	8.7273	9.0726	0.4862	6.6418	0.0371	0.0639	1.3708	11.473	0.1065	0.15	0.0939	0.307	0.1985	10.4784	10.5452	0.0929	8.9505	2.6658	7.4615	0.1043		7.7605	5.5511	1.9357	6.5138	7.9394	0.3133	0.1075	0.1602	0.1871	0.1069	0.7011	0.6701	0.0876	4.5064
23_SLFZ_01	5	2.626	13.2611	14.168	13.184	2.0864	2.0383	2.4536	1.571	12.7937	10.5087	4.947	18.0238	13.9952	14.1759	12.1034	2.3922	11.2794	2.3865	7.8797	1.9766	13.0566	7.4979	7.3083	7.8832	8.1118	7.4943	11.7762	11.3715	7.5485	11.0396	7.8229	12.8959	7.6024	7.7605		2.0566	0.6645	13.3189	12.4765	7.1519	7.4453	8.2963	7.5423	7.8561	10.4165	9.5351	7.3483	11.7176
23_SLFZ_02	4	4.552	16.4339	5.4904	4.5421	3.4059	3.0358	3.0003	3.8227	6.3807	12.294	4.1773	10.2071	11.1961	9.5106	11.2621	7.0405	9.9371	1.6316	5.6905	3.601	8.7331	5.8832	5.3742	6.191	6.5717	5.7868	8.9671	8.7693	5.6777	7.9833	3.559	9.7641	5.6503	5.5511	2.0566		2.4436	9.5015	10.414	5.8258	5.9637	5.764	6.0816	5.6928	6.7521	5.4272	5.6692	6.1088
24_SLFZ_01	3	1.1209	6.5951	1.5967	1.8157	4.988	5.1703	5.0056	5.5734	3.9293	8.5927	2.0559	4.1053	4.1857	2.4951	2.7519	16.0942	4.8117	8.2478	1.7333	1.47	1.9952	1.2418	1.096	1.7468	2.13	1.3956	0.1762	0.1854	1.2427	0.6258	1.9016	1.3451	1.3214	1.9357	0.6645	2.4436		5.0458	3.1702	0.8903	1.6392	2.3713	1.0756	2.139	2.6086	1.5344	1.5499	0.3889
25_SLFZ_01	5	9.702	5.1547	8.6085	6.494	13.8736	13.7988	13.6219	13.9038	22.9479	9.5254	9.2189	8.0661	9.9756	10.1452	10.1799	3.1971	7.7773	3.2053	6.3159	2.7229	6.7619	7.0979	7.4819	6.1562	5.0324	6.0876	8.2701	8.6919	7.5623	6.349	6.4913	9.718	7.8536	6.5138	13.3189	9.5015	5.0458		5.7301	8.1041	6.354	6.5184	7.3862	5.635	5.5054	6.2779	6.2169	9.7098
25_SLFZ_02	5	6.8404	5.6374	6.8846	6.8832	13.1766	13.8912	13.7495	12.7964	22.9276	9.0354	8.4139	7.6437	9.9351	9.043	10.1007	2.5724	8.2182	3.9754	8.3174	1.9611	7.4388	9.1618	9.0082	8.4643	8.8777	9.0592	9.9644	10.283	8.7317	7.9328	5.3977	10.3662	8.6288	7.9394	12.4765	10.414	3.1702	5.7301		9.9224	8.9353	7.1188	9.2505	7.8909	5.3376	5.4528	8.8862	5.7303
28_SLFZ_01	5	3.553	11.3576	12.7519	11.9642	5.677	5.6322	5.6997	5.7361	20.9226	11.15	1.6367	11.3142	6.8612	8.2768	7.5115	0.6622	6.2445	0.2027	0.3576	1.5587	10.8928	0.118	0.0647	0.2693	0.6355	0.5696	10.9372	10.9349	0.0809	9.4721	4.0411	9.1943	0.1319	0.3133	7.1519	5.8258	0.8903	8.1041	9.9224		0.1948	0.5254	0.0386	0.4377	1.4636	1.2148	0.1978	6.2386
29_SLFZ_01	5	4.4552	10.8986	11.8207	11.814	5.7738	5.9269	5.9183	5.9487	22.032	11.2833	1.8384	10.1934	7.2812	8.7396	8.1986	0.4303	5.6839	0.0063	0.1702	0.9497	11.1423	0.0943	0.1545	0.0126	0.1668	0.3083	10.7513	10.8262	0.121	9.2253	3.0427	8.5042	0.1886	0.1075	7.4453	5.9637	1.6392	6.354	8.9353	0.1948		0.249	0.0735	0.1051	0.9482	1.1071	0.0228	5.7329
30_SLFZ_01	5	4.3666	9.9074	14.3819	14.0847	5.6769	5.7773	5.8157	5.798	21.2393	10.4356	2.4071	11.2169	6.6499	9.0569	7.6979	0.3498	5.3078	0.0196	0.3876	1.5091	11.9611	0.4237	0.3333	0.2083	0.5412	0.6761	10.3875	10.4591	0.2743	8.9823	2.3883	8.4885	0.3056	0.1602	8.2963	5.764	2.3713	6.5184	7.1188	0.5254	0.249		0.3446	0.1296	0.2751	0.4233	0.2938	4.762
31_SLFZ_01	5	3.8531	10.8278	12.3847	12.4439	5.9138	5.95	5.9862	6.0178	21.2726	11.3581	1.7688	10.8258	6.8574	8.3342	7.7296	0.5115	5.946	0.064	0.2463	1.3913	10.7976	0.0706	0.0627	0.1113	0.4052	0.4537	10.8418	10.8821	0.0495	9.461	3.5954	8.8803	0.1075	0.1871	7.5423	6.0816	1.0756	7.3862	9.2505	0.0386	0.0735	0.3446		0.2566	1.1365	1.0614	0.0905	5.9485
32_SLFZ_01	5	4.3943	10.221	12.6443	12.2785	6.0118	6.2041	6.2105	6.2033	21.6855	11.1155	2.0636	9.9321	7.4025	9.0768	8.3365	0.4371	5.3946	0.1206	0.1809	0.9214	11.4795	0.2589	0.2462	0.081	0.188	0.3637	10.0655	10.151	0.2521	8.5315	2.3881	7.9054	0.3338	0.1069	7.8561	5.6928	2.139	5.635	7.8909	0.4377	0.1051	0.1296	0.2566		0.6424	0.8095	0.0939	5.005
33_SLFZ_01	5	5.3221	8.3549	14.3003	12.8794	6.5104	6.6833	6.6917	6.6658	21.8243	10.3861	3.4364	11.1432	6.7788	10.0474	8.2861	0.1349	5.6389	0.1988	1.0682	2.0053	12.8676	1.2414	1.1428	0.8078	1.2081	1.4688	10.9546	11.0978	0.9855	9.275	2.187	8.6479	0.9802	0.7011	10.4165	6.7521	2.6086	5.5054	5.3376	1.4636	0.9482	0.2751	1.1365	0.6424		0.3574	1.0386	4.2454
34_SLFZ_01	5	3.6937	7.6103	14.2481	12.7601	5.7075	5.7677	5.8273	5.8194	19.9393	9.5569	2.1223	11.9455	6.7632	10.115	7.5991	0.4501	7.1871	0.0194	0.9238	1.3351	12.4889	1.0859	0.852	1.0117	1.595	1.3728	10.1062	10.2479	0.7812	7.8306	2.7142	7.6699	0.731	0.6701	9.5351	5.4272	1.5344	6.2779	5.4528	1.2148	1.1071	0.4233	1.0614	0.8095	0.3574		1.0833	3.3113
35_SLFZ_01	5	4.1047	10.5549	11.6414	11.5647	5.6629	5.8483	5.8276	5.8682	21.7474	11.1433	1.5332	9.6067	7.7462	8.3781	8.6153	0.4603	6.0342	0.0466	0.0923	1.0087	10.9572	0.0619	0.1175	0.0369	0.1537	0.2123	10.4777	10.5506	0.1137	8.9123	3.108	7.889	0.1831	0.0876	7.3483	5.6692	1.5499	6.2169	8.8862	0.1978	0.0228	0.2938	0.0905	0.0939	1.0386	1.0833		5.3473
35_SLFZ_02	5	5.3653	4.7068	11.4456	11.9942	5.4461	6.4923	6.1653	6.0914	21.5129	7.3187	1.7388	8.382	10.692	8.4899	8.7489	0.4603	8.5906	0.0466	4.4326	0.8206	12.9916	5.2771	5.3163	5.5165	5.7511	4.4821	11.2444	11.4433	5.1672	9.5006	4.5592	1.9753	4.9353	4.5064	11.7176	6.1088	0.3889	9.7098	5.7303	6.2386	5.7329	4.762	5.9485	5.005	4.2454	3.3113	5.3473
36_SLFZ_01	5	8.5554	6.3943	16.3508	16.0695	14.0524	15.0798	14.6653	15.0297	22.8899	13.2649	9.0974	7.1494	11.3356	9.8172	10.1839	0.0852	6.3459	3.1618	8.0786	3.6972	17.2816	9.4538	9.4345	8.703	8.2018	8.4503	12.6315	12.8298	9.4635	11.1163	7.6709	7.1305	9.5405	8.1936	16.5906	11.303	5.1706	7.032	5.1783	10.7136	9.1756	7.8039	9.9311	7.6969	6.4774	6.7622	8.7887	4.7217
37_SLFZ_01	3	0.7421	3.4096	3.7302	4.024	1.506	1.5276	1.7331	1.5525	4.1821	6.2883	0.0477	1.0335	1.0335	0.249	0.2445	3.3241	0.3072	0.0731	0.0212	3.757	4.3845	0.0504	0.1599	0.0199	0.0928	0.0626	4.4944	4.653	0.1416	5.656	0.0665	0.9433	0.165	0.0102	2.1592	1.8486	7.9567	3.0798	3.8379	0.3759	0.0369	0.0741	0.1822	0.0115	0.2349	0.0222	0.0064	0.0064
38_SLFZ_01	3	1.3438	3.5029	3.337	3.7009	4.8359	5.5108	5.6515	5.6727	4.3136	6.4659	2.5205	2.6692	3.2482	2.1041	2.1929	0.2269	2.7562	2.3355	0.173	8.4038	7.3914	0.1951	0.3184	0.1402	0.1515	0.2205	2.6047	2.7074	0.2006	3.5995	0.1376	0.1376	0.1752	0.1291	1.7568	5.1021	13.9855	3.3536	2.8447	0.2965	0.1689	0.1698	0.2366	0.2315	0.1616	0.2375	0.2042	0.2042
39_SLFZ_01	5	7.1871	7.8271	5.2785	3.98	13.049	13.9285	14.0077	13.1628	19.7897	9.8022	8.6418	5.5765	7.3737	7.2722	7.7696	4.916	9.3272	5.0491	8.635	4.4142	3.8774	9.3462	9.3666	9.1784	7.8685	7.8792	9.023	9.425	9.3177	6.6146	9.3231	7.3064	9.345	9.2743	11.3884	11.5629	3.3612	2.6193	3.832	9.5154	9.2323	8.0846	9.4063	8.9398	7.2429	7.1835	8.8319	10.2674
39_SLFZ_02	5	11.0116	15.3119	16.5813	15.7077	5.841	4.9098	5.7789	4.7944	13.8665	4.3599	5.8586	20.7783	23.4441	20.5731	20.9925	7.1749	19.2492	4.5957	13.9784	3.736	15.3274	14.653	14.5223	15.7508	16.5805	13.8734	10.8441	10.4584	14.3747	10.0804	10.9408	17.2349	13.8747	14.0091	10.5532	4.152	1.4078	16.238	14.932	15.3875	15.7518	14.8278	15.6433	15.3572	15.0409	12.8717	15.4475	12.3066
40_SLFZ_01	5	7.2689	7.8276	5.6612	4.3357	12.9165	13.8141	13.8859	13.0441	19.8205	9.9077	8.7248	5.612	7.4127	7.4385	7.9404	4.7885	9.4414	4.9728	8.7317	4.2526	4.2352	9.4674	9.224	9.2988	7.9944	7.9696	9.0318	9.4278	9.1602	6.5785	9.259	7.1481	9.177	9.3617	11.0931	11.346	3.404	2.6767	3.78	9.3788	9.3508	7.9429	9.2634	9.0246	7.0681	6.9785	8.9398	10.1085
40_SLFZ_02	5	10.5968	15.2832	16.5933	15.6753	5.3654	4.4607	5.2931	4.3672	14.1849	4.2508	5.5358	20.9307	23.4954	20.8419	20.7922	6.832	19.2277	4.129	13.5243	3.4466	15.7562	14.1704	14.0281	15.2999	16.1686	13.4203	10.9515	10.5529	13.879	10.1049	10.7845	16.6946	13.3714	13.5476	10.1494	3.7125	1.1531	16.2399	14.8188	14.8765	15.2905	14.3714	15.1519	14.9209	14.611	12.395	14.9845	11.7863
41_SLFZ_01	5	4.3348	11.1495	12.837	11.5324	4.0946	4.2658	4.2048	4.3256	20.6931	8.4755	0.971	10.7743	9.5259	9.0908	9.8134	1.1399	8.7775	0.043	0.3877	1.9128	11.9478	0.3367	0.41	0.6696	1.0186	0.3644	11.1608	11.1181	0.3363	9.5602	3.5633	7.4682	0.2583	0.373	6.8778	4.5958	1.5536	8.4654	9.7655	0.5127	0.5955	0.8228	0.5563	0.7807	1.6941	1.2586	0.5399	4.6993
41_SLFZ_02	5	3.9363	10.665	13.0363	11.4489	3.7376	3.9337	3.8468	3.9772	21.2819	8.3135	0.8984	10.7054	9.3955	8.9812	9.6594	1.1287	8.8101	0.073	0.4436	1.989	12.1469	0.359	0.4178	0.7087	1.1126	0.4438	11.0913	11.0579	0.3349	9.5101	3.9834	7.5228	0.2486	0.408	6.3569	5.0557	1.9891	8.5642	9.8287	0.497	0.6308	0.842	0.557	0.8427	1.7064	1.2427	0.5749	4.6501
42_SLFZ_01	4	3.5551	19.7427	8.7857	9.5399	1.9363	1.5633	1.8376	1.7993	7.8005	14.3466	5.4022	11.9945	12.6163	11.6208	11.6569	8.3923	9.5916	0.919	7.7082	3.0474	10.3977	7.7638	7.0024	7.9841	8.6757	7.8242	8.317	8.0219	7.3262	9.9986	1.6492	10.4265	7.2679	7.2545	1.8151	1.8808	5.8318	11.1458	11.5578	7.426	7.6541	7.1264	7.7775	7.356	8.1186	6.8842	7.444	7.7765
43_SLFZ_01	4	1.9492	12.1516	3.7603	4.5404	8.611	10.2988	9.7162	9.4742	8.4586	9.9298	4.3311	3.4792	5.0357	4.4469	3.6997	0.0005	4.6208	0.992	6.9083	2.9431	8.9968	7.6598	8.5606	8.2382	7.1967	5.8689	6.3879	6.3218	8.4402	7.2999	1.3795	0.6474	8.2907	7.6796	3.9716	11.5025	1.1328	8.5927	5.2166	9.2039	8.2684	9.0343	8.898	8.1746	9.4522	8.1032	7.6805	1.8719
44_SLFZ_01	5	8.5094	9.1581	17.2603	16.103	8.4873	7.9846	7.8114	8.5507	21.3477	3.7003	8.6745	12.799	14.305	13.5264	13.2949	5.519	9.5742	3.6107	8.5656	2.4747	15.0359	9.4753	9.0171	9.4473	8.7276	8.4353	7.6906	7.5839	9.7067	6.2811	5.1793	11.5117	10.0071	9.0423	11.2931	4.4689	3.0294	6.9527	7.4049	10.0267	9.3841	9.2416	9.8941	8.2204	8.8789	7.7795	8.9012	7.5378
46_SLFZ_01	5	11.1056	1.6829	14.0774	13.3268	16.094	16.091	16.4644	16.0752	18.5634	8.194	12.899	14.4724	14.6872	12.4718	14.8521	1.7788	9.1307	2.3874	8.2876	1.2742	11.3528	9.0404	8.8042	8.2351	7.8762	8.4973	3.1242	3.3506	8.9852	2.6707	6.4163	12.5437	9.1864	8.1579	13.784	9.5122	4.2761	2.9786	5.5526	9.6216	8.4065	7.5846	9.0819	7.3662	7.2696	7.9659	8.3099	9.878
47_SLFZ_01	5	9.7856	5.4735	8.0013	6.0335	13.3561	13.9831	14.1777	13.3736	23.4819	10.3277	8.7692	7.6801	9.445	9.6155	9.6423	2.9985	7.5496	3.2139	6.1438	2.568	6.3941	6.9164	7.3628	6.0144	4.8845	5.876	8.2232	8.6709	7.407	6.2856	6.6302	9.1	7.6771	6.3601	12.9281	9.7992	4.9095	0.0485	5.6228	7.963	6.2151	6.4394	7.2447	5.5523	5.5605	6.2937	6.0728	9.2944
48_SLFZ_01	4	5.1508	3.479	8.7122	10.5854	21.6072	19.3709	20.4267	20.3014	15.9807	21.9843	19.6057	3.3842	4.4438	2.181	3.0384	1.6398	4.5979	4.1687	5.6452	5.7488	6.2141	5.7088	5.2799	5.4388	5.6282	6.2191	5.0297	5.2126	5.4916	4.8744	2.4011	2.2003	5.6875	5.6097	11.0151	19.6217	9.311	3.119	3.6184	5.4193	5.4977	5.1028	5.3305	5.0792	5.2159	5.3243	5.3706	1.7521
49_SLFZ_01	4	0.8829	22.4029	5.1944	7.0455	5.242	5.4834	5.9437	4.8279	7.2998	18.3132	2.9799	8.4461	8.5978	7.6174	5.6018	2.7564	5.9967	1.3875	2.9538	1.499	4.8438	3.3698	3.0651	3.2355	3.1016	2.9295	7.168	7.0789	3.342	5.5245	3.4052	4.9506	3.4335	2.9167	4.2186	5.5278	2.8375	5.8984	6.5965	3.6766	3.1433	2.8833	3.5504	2.5844	3.3525	2.6962	2.92	2.8749
50_SLFZ_01	5	5.0314	11.7181	11.1501	9.7406	2.5029	2.6489	2.6221	2.6483	21.6754	9.8947	0.7422	13.2082	15.2594	11.6559	14.875	0.6529	14.1542	0.6051	4.8223	2.6161	12.3634	4.4308	4.726	5.2423	5.4627	4.5158	15.4782	15.4519	4.7005	13.099	7.1582	8.2864	4.6257	5.0828	4.5024	3.97	1.6317	13.5792	12.2714	4.424	4.9864	6.2515	4.7679	5.7842	8.1198	7.3184	4.7815	8.735
52_SLFZ_01	3	1.4772	3.2378	3.3919	3.7391	5.4464	6.2201	6.3378	6.3199	4.7162	6.6483	3.1333	2.637	3.3193	2.2647	2.366	0.1157	2.8106	2.8947	0.3454	9.3951	8.1297	0.3736	0.5226	0.2497	0.2553	0.4304	2.6432	2.7844	0.3755	3.6894	0.2662	0.2662	0.3541	0.2796	2.0033	5.7748	15.1446	3.4893	2.9025	0.4918	0.3053	0.2798	0.3936	0.3654	0.1811	0.3751	0.3479	0.3479
56_SLFZ_01	4	4.1043	4.6875	7.9062	7.4767	18.8145	16.9119	17.7424	17.7268	18.8406	19.2675	17.3594	1.5129	3.9343	0.6023	3.7823	0.8488	3.6457	3.3323	3.8531	6.2817	4.6938	4.7931	5.1934	4.7411	4.3985	3.8705	7.2544	7.6081	5.0188	7.0254	3.8719	0.715	4.9446	4.208	11.6233	18.4574	9.7208	2.8141	3.2644	6.0706	5.1407	4.396	5.5009	4.3552	3.3362	3.0259	4.7911	0.4344
57_SLFZ_01	4	4.0474	4.8798	8.1078	7.7305	19.2173	17.3147	18.175	18.1074	19.1507	18.2729	17.2702	1.3578	3.9072	0.3942	3.6451	1.2592	3.6195	3.6122	4.0111	5.8038	3.8486	4.9605	5.2968	4.9701	4.6096	4.0643	7.0796	7.3512	5.1961	6.5757	3.8047	0.9339	5.1511	4.4325	11.0373	18.4788	9.5306	2.5556	3.5571	5.9333	5.3582	4.6467	5.6626	4.5342	3.6851	3.2092	4.9642	0.7204
58_SLFZ_01	4	4.1377	4.8579	8.0167	7.598	19.7314	17.8099	18.6731	18.6124	19.4211	18.2964	17.7688	1.2212	3.7741	0.3834	3.5578	1.1719	3.4962	3.7818	4.1218	6.1011	4.0712	5.0935	5.4469	5.0587	4.6597	4.1681	7.2769	7.6189	5.3412	6.8126	3.9752	0.8503	5.3036	4.5423	11.4671	19.0292	9.858	2.4808	3.5084	5.8504	5.4573	4.7397	5.6252	4.6125	3.7382	3.34	5.0639	0.7436
59_SLFZ_01	4	4.2749	4.8661	8.2197	7.831	20.0764	18.1386	19.021	18.9397	19.4815	18.1432	17.9791	1.1881	3.7385	0.3499	3.4494	1.3378	3.4789	3.9699	4.3464	6.0101	3.866	5.3335	5.6701	5.3161	4.9086	4.4091	7.1716	7.5199	5.5842	6.742	3.9713	0.9463	5.5539	4.7921	11.4155	19.1919	9.8435	2.3702	3.5984	5.7468	5.6188	4.9957	5.5326	4.8502	3.9966	3.5396	5.3059	0.8816
60_SLFZ_01	4	0.8128	7.5872	7.7895	8.8172	11.2991	12.6891	12.2575	12.1262	9.325	13.9932	7.628	5.3495	6.0503	5.2097	3.6523	1.3499	4.8886	1.3054	3.6285	1.5875	4.8641	3.7945	3.2985	4.211	4.6549	3.7993	3.2995	3.3225	3.5415	3.5416	1.5344	0.9161	3.5179	3.6601	4.962	11.9138	3.6412	6.9774	2.6275	3.6187	4.0933	3.6649	3.8524	3.7118	4.2806	3.448	3.7331	2.1646
61_SLFZ_01	4	3.5159	15.181	7.6096	7.8315	7.6094	8.5103	8.367	8.0533	7.981	15.2644	3.7221	6.711	8.4118	6.8284	5.6949	3.5079	7.5578	2.785	7.0933	2.0773	4.5744	7.2337	6.6792	8.2054	8.2996	6.7755	6.2954	6.0982	7.0366	6.6561	3.8385	1.9596	6.9163	7.2673	5.0948	8.2062	2.2687	9.8734	5.5154	7.0485	7.8998	7.71	7.5644	7.6187	6.8149	5.3245	7.3869	2.9948
62_SLFZ_01	4	4.0192	13.9994	0.2747	0.4874	23.1965	24.1532	24.3419	24.4461	20.2728	8.5168	19.7566	6.0337	8.7167	6.5176	7.0781	2.23	4.5572	4.6165	4.2314	7.3365	2.6441	4.7283	4.9806	4.0351	2.9972	3.9585	4.3855	4.4812	5.2429	2.6793	3.8034	7.1586	5.6132	4.5061	6.2565	27.3101	10.8304	0.8535	0.8604	5.4176	4.0965	4.5031	4.9118	3.565	4.8069	3.9767	3.9596	4.0414
63_SLFZ_01	4	4.4202	13.5066	0.2802	0.3426	24.4839	25.4455	25.6766	25.7841	21.5074	9.0787	21.3026	5.5413	8.2376	6.3284	6.8902	2.1064	4.9558	5.2964	4.6872	8.4116	2.7185	5.2743	5.5878	4.4711	3.3469	4.4082	4.6621	4.84	5.8115	2.8897	4.1757	6.7242	6.1833	4.9615	7.1765	28.6224	12.1674	0.4763	0.5305	6.0831	4.5824	4.9128	5.4852	3.9745	4.5637	3.9618	4.4378	4.5476
64_SLFZ_01	4	5.8418	3.8289	10.1345	10.5737	23.2863	21.0715	22.0908	21.9931	18.3146	22.3302	22.1477	1.9524	3.5607	1.3736	2.6727	1.3532	3.6205	4.9459	5.282	7.0225	5.9846	5.3225	4.9721	4.8607	4.9763	5.9387	6.4265	6.7089	5.129	6.1065	3.1609	1.4277	5.3628	5.2156	12.0635	21.6986	10.6037	2.384	3.4226	5.0492	4.9771	4.6109	4.8599	4.5876	4.5589	4.9844	4.9318	1.5722
65_SLFZ_01	4	4.9865	13.371	0.2678	0.3706	21.8706	24.2017	23.0695	23.3045	15.8391	6.4821	19.1031	7.1971	9.642	7.2544	7.944	5.34	5.1491	6.9397	5.7681	9.417	0.7968	6.2851	6.4603	5.796	4.8556	5.5564	1.6445	1.741	6.769	0.7522	5.5577	8.5174	7.1132	6.1258	7.9191	22.2946	10.8044	1.2182	0.9163	6.946	5.8563	6.2088	6.5209	5.2938	5.9139	5.0706	5.6521	5.1301
65_SLFZ_02	4	4.7563	14.0231	0.8693	1.2205	21.7273	21.4521	21.401	21.5483	13.3554	7.3579	17.3666	8.6703	10.5749	8.1738	8.7594	6.3507	4.9948	6.6593	5.2035	8.5371	0.7163	5.5406	5.6798	5.2247	4.5357	4.9533	1.5541	1.5466	5.9377	0.8937	4.9717	9.012	6.2096	5.4605	6.8494	23.0115	9.6238	2.4454	1.9752	6.0471	5.2113	5.5878	5.7495	4.8423	6.2707	6.0394	5.0807	5.5224
66_SLFZ_01	4	6.0409	21.7156	2.0902	2.3971	13.1206	13.6029	13.0201	14.1792	7.8147	17.0989	5.2811	6.4209	6.7033	5.0362	4.0869	3.4023	10.8717	3.5997	4.5469	2.5742	3.9078	4.2817	5.1988	4.2234	3.9472	4.2463	9.1893	9.1298	4.8117	9.9614	6.1491	7.0587	4.9005	4.9615	6.8556	11.9373	1.4704	9.2772	5.6165	4.7254	4.4047	5.8207	4.356	5.2678	6.5554	6.3656	4.4944	5.4982
67_SLFZ_01	4	1.3502	10.5221	6.4767	6.2987	5.9531	5.1244	5.694	5.4331	6.3824	12.9676	6.7619	5.8802	4.7541	7.511	3.5108	2.1632	2.1371	1.3042	5.4947	3.2845	8.7014	5.2266	4.2363	4.8881	5.8591	6.1906	5.2204	5.0763	4.5422	6.9674	5.3164	9.2659	4.6467	4.7376	4.8298	4.4131	5.1732	5.4984	9.9022	4.4007	4.6583	3.8081	4.5981	4.3801	4.2579	3.6932	4.8222	8.6259
67_SLFZ_02	4	1.9773	17.1635	6.4346	6.2731	5.7374	6.3714	6.2629	6.2267	7.0742	15.9524	7.6965	3.7916	7.2345	2.3359	6.3539	2.1632	6.3337	1.3042	6.5739	3.2845	9.4407	6.2191	6.6281	7.2297	6.997	5.5741	8.098	7.8541	6.7071	9.2006	2.1126	5.4922	6.6357	7.0323	1.8801	4.952	4.5292	10.0157	6.3012	6.2709	6.7947	8.3971	6.7476	7.56	7.1311	5.7036	6.5057	5.7583
69_SLFZ_01	4	1.8822	19.493	7.206	8.0691	1.4699	1.2677	1.4505	1.4107	10.3914	15.1902	2.5358	11.8	12.3266	10.7568	10.659	8.5908	10.585	1.0106	5.5127	2.8851	7.2085	5.3637	4.8008	6.0209	6.6666	5.5524	9.3097	8.9588	5.1159	10.5413	3.3521	7.1779	5.0484	5.3832	1.6194	1.9017	4.5494	13.7142	13.5628	5.0085	5.6715	5.7382	5.4759	5.7405	7.1141	5.3467	5.3553	5.6913
70_SLFZ_01	3	0.5047	2.81	4.2665	4.2121	14.7314	15.3713	15.8677	15.3585	4.5917	13.9355	8.7182	0.2258	0.5619	1.2201	1.2691	2.0835	0.4891	9.22	3.2312	12.0046	6.5198	3.1957	3.0107	2.6055	2.511	3.7994	1.0951	1.2313	3.1019	1.9725	0.3431	0.3431	3.3492	3.1595	5.0195	12.7344	17.952	2.7013	2.8268	2.9672	2.746	2.4929	2.7063	2.4912	2.0526	2.5061	2.6816	2.6816
72_SLFZ_01	4	5.0754	12.3445	0.1239	0.095	24.6398	25.6786	25.8942	25.9527	18.9285	8.3339	21.7634	6.025	8.4098	6.5569	7.1743	4.1083	5.627	7.2324	5.573	10.0829	1.3012	6.1918	6.4966	5.4718	4.419	5.3373	2.7196	2.9326	6.7004	1.4435	5.1519	7.1141	7.0379	5.8696	8.1553	25.3839	12.9061	0.3518	0.2474	7.0308	5.6082	5.8473	6.4432	4.9776	5.2173	4.6904	5.4342	5.5383
73_SLFZ_01	4	3.0051	19.7824	8.1839	9.1552	1.372	1.0384	1.2609	1.2588	9.7909	15.6045	4.1536	12.6177	13.4078	12.1916	12.0605	9.5463	11.0096	1.3092	7.2393	3.4529	9.5054	7.095	6.417	7.6375	8.4204	7.3077	11.1362	10.7816	6.7219	12.4828	2.7869	8.8211	6.63	6.9208	1.4606	1.9596	5.5271	13.4269	13.7129	6.6599	7.2617	7.0811	7.1441	7.2569	8.3721	6.758	6.9987	7.3595
75_SLFZ_01	4	6.599	5.319	9.796	9.6334	24.8881	26.4729	25.9904	25.5755	16.5649	20.5775	23.7457	1.6422	3.5431	2.0266	2.6258	2.9404	3.7335	8.4826	5.1092	9.2088	6.6351	5.2453	4.8442	4.7043	4.9311	5.8941	8.6421	8.9829	4.9537	7.8593	4.436	2.7503	5.1513	4.9555	13.4711	25.299	12.8854	2.1664	5.1671	5.0164	4.8814	4.2132	4.7793	4.3708	3.8477	4.2455	4.903	4.0589
78_SLFZ_01	4	5.2217	16.2127	6.0101	4.7017	7.1419	7.4273	6.8214	8.365	7.7279	16.3831	3.5486	7.3931	7.7818	5.833	8.7003	3.7083	6.1638	3.1109	2.9754	2.4819	8.0323	3.4502	3.553	3.6416	3.3643	2.936	5.7152	5.7529	3.6734	4.3502	6.7624	8.3857	3.6829	3.2713	7.804	3.5478	0.5588	7.5983	4.8699	4.0644	3.6595	3.9062	3.9612	3.4021	4.5059	3.608	3.3381	3.846
80_SLFZ_01	3	1.5834	9.8284	0.8785	0.8212	1.8465	1.8178	1.7505	2.0287	4.8003	6.0281	0.4984	7.4481	4.5919	4.7009	3.8254	25.1289	7.0862	17.3457	2.4725	5.8721	0.8786	2.3518	2.2473	2.9147	2.9466	2.4708	2.3206	2.3622	2.4878	2.3377	4.2507	2.0472	2.5426	2.8034	2.8131	2.7234	2.2489	8.3415	7.6913	2.3847	2.7674	3.4431	2.5194	2.9467	4.6779	2.9841	2.4662	2.3644
80_SLFZ_02	3	1.1472	4.3504	0.868	0.8373	3.094	3.4591	3.266	3.3921	6.3132	6.6764	1.1903	8.1017	10.2276	4.5998	5.9062	21.8898	7.7025	13.3248	4.5072	7.3821	1.3959	3.9667	3.8899	4.7256	5.7226	4.1944	1.3335	1.2528	3.7452	1.5703	2.8025	5.1393	3.4638	4.1207	2.7003	2.6712	4.4722	7.3778	7.2007	3.7443	4.342	4.6851	4.144	5.0779	5.9633	4.6842	4.2324	5.2661
82_SLFZ_01	4	3.6638	18.3865	8.0806	6.7034	4.1706	3.8214	3.8423	4.5366	5.5214	14.5968	5.6086	10.1647	9.6621	9.2609	8.9951	6.8462	8.3453	1.0797	6.9627	1.5124	8.5859	7.2814	6.5308	7.4456	7.8209	7.1736	8.1789	7.8261	6.9804	6.4894	2.6423	11.2862	7.0159	6.7585	3.0509	0.9742	3.6123	7.8721	11.1932	7.1323	7.2025	6.7381	7.3952	6.6596	7.6982	6.3422	6.8879	7.3111
83_SLFZ_01	3	0.9501	4.6922	4.326	4.3855	0.5388	0.5005	0.6473	0.5053	5.4028	6.4911	0.26	0.5006	0.5006	0.3337	0.3342	5.9628	0.0304	0.2172	0.5842	3.6492	5.09	0.1955	0.1013	0.3593	0.9299	0.8305	3.7033	3.6642	0.0826	4.817	0.2764	0.2764	0.0773	0.3962	1.7835	1.484	7.2139	3.4665	4.0416	0.0088	0.2739	0.3578	0.0555	0.5849	0.7838	0.2699	0.3391	0.3391
83_SLFZ_02	3	0.9501	4.6922	4.326	4.3855	0.5388	0.5005	0.6473	0.5053	5.4028	6.4911	0.26	0.5006	0.5006	0.3337	0.3342	5.9628	0.0304	0.2172	0.5842	3.6492	5.09	0.1955	0.1013	0.3593	0.9299	0.8305	3.7033	3.6642	0.0826	4.817	0.2764	0.2764	0.0773	0.3962	1.7835	1.484	7.2139	3.4665	4.0416	0.0088	0.2739	0.3578	0.0555	0.5849	0.7838	0.2699	0.3391	0.3391
84_SLFZ_01	4	5.2993	23.5392	6.3815	7.0023	1.949	2.2973	1.976	2.3414	14.4508	8.6697	2.3386	13.1618	14.1035	11.3682	11.1797	7.8547	14.1005	1.11	5.2564	5.6948	12.7923	4.7905	5.0876	5.6479	6.2578	4.8833	12.8464	12.6263	4.818	14.1767	6.9193	6.6171	4.5194	5.1808	5.5204	6.302	2.5643	14.3484	14.2455	4.8635	5.4034	6.0918	5.1732	6.2521	7.2038	6.0632	5.2547	5.5653
89_SLFZ_01	5	8.7329	9.2655	13.7542	11.8686	7.1547	6.4705	6.8094	6.8474	18.2288	6.6905	6.2047	11.5573	14.5629	9.442	12.6542	6.3785	15.5436	3.021	7.5599	2.3753	10.4484	7.4971	7.832	8.856	9.3862	7.2422	11.9708	11.8024	7.6634	11.1884	5.5931	10.9704	7.3361	7.977	9.2013	5.9982	2.6371	18.539	15.2277	7.911	8.7376	9.3678	8.2721	9.2775	10.637	8.8358	8.3959	9.3823
89_SLFZ_02	5	8.2491	8.4112	12.0988	13.4874	6.3304	6.5621	6.8833	6.0749	16.4	12.1203	6.1598	16.3181	10.3021	12.3451	9.1081	6.2516	12.7266	2.9792	8.6282	2.2738	8.8924	8.3864	8.5031	9.3771	10.2739	8.2833	10.438	10.3258	8.2168	9.7768	9.7847	9.6977	7.8404	8.541	8.0399	6.5341	2.0417	16.5076	18.1321	8.4646	9.2101	9.1775	8.811	9.6301	9.9165	8.6376	9.0901	8.284
89_SLFZ_03	5	7.8833	8.8554	12.5703	11.3171	6.9296	6.7598	7.395	7.0719	19.3285	6.7194	4.4652	9.6789	12.9089	7.6773	11.0497	5.3849	14.7433	2.1172	5.4658	2.3954	9.7642	5.5404	5.8904	6.6939	7.0457	5.1461	11.0064	10.8863	5.7437	10.1482	5.4135	8.861	5.4688	5.8902	8.8772	7.4527	1.877	16.514	12.872	6.0793	6.6229	7.1634	6.3107	6.9897	8.274	6.7335	6.2993	7.4299
89_SLFZ_04	5	7.4158	6.5773	11.0734	12.5275	7.0107	7.3821	7.5675	6.9264	16.5891	12.5131	4.5336	14.4379	8.5626	10.8381	7.3018	5.4291	11.7453	2.1141	6.9022	2.12	8.5353	6.8539	6.9589	7.7039	8.4962	6.6402	9.4319	9.3687	6.6861	8.7283	9.8243	7.7839	6.334	6.8419	8.4095	7.8282	2.1115	14.4491	15.8312	7.192	7.6176	7.381	7.3137	7.8194	7.8464	6.6284	7.475	6.1361
90_SLFZ_01	3	0.9855	4.7715	4.4114	4.4721	0.5002	0.4608	0.5939	0.4848	5.4881	6.3495	0.2671	0.4311	0.4311	0.3347	0.3307	5.8546	0.0176	0.1948	0.5831	3.8211	5.2896	0.1931	0.1128	0.3374	0.9096	0.8151	3.8868	3.8457	0.0772	5.0171	0.335	0.335	0.0658	0.3765	1.7794	1.4783	7.4289	3.4797	4.0826	0.0187	0.2539	0.3235	0.0529	0.5688	0.7212	0.258	0.3309	0.3309
92_SLFZ_01	3	1.1136	5.1977	4.5006	4.4509	0.6886	0.6904	0.888	0.5781	5.0602	7.765	0.7325	1.0775	1.0775	0.7846	0.8128	8.111	0.4021	0.8276	1.2548	3.0194	4.6459	0.6929	0.4308	1.0512	1.8277	1.6706	2.4528	2.4171	0.5082	3.6977	0.0689	0.0689	0.5247	1.0966	1.4858	1.6124	6.0388	3.9671	4.3015	0.2122	0.9109	1.0958	0.4349	1.3454	1.7962	0.8657	0.9513	0.9513
93_SLFZ_01	5	10.1964	4.093	7.7339	9.9634	1.7052	1.7753	1.7313	1.8894	16.7445	7.1932	0.7747	12.3911	12.7921	13.1368	9.8522	1.8074	14.711	0.3754	17.4643	3.1765	7.6616	17.9785	18.2578	18.6198	18.9238	17.6786	18.5667	18.4461	17.876	16.7073	6.8714	8.1553	17.4972	17.6059	16.3978	3.1059	2.3805	21.1733	14.6991	18.7695	18.871	18.2645	18.6722	18.7444	17.6962	16.2757	18.3674	9.4048
93_SLFZ_02	5	13.3221	10.4731	8.9006	8.3487	4.6008	3.5469	4.0149	4.0688	13.4151	9.7498	8.8412	19.3749	20.7856	18.2957	20.1787	1.8074	20.234	0.3754	17.5064	3.1765	17.6982	17.6211	17.4035	18.0368	19.3389	17.9165	16.4989	16.3292	17.0029	19.036	10.4001	15.919	16.5676	16.9652	14.842	4.5964	6.37	16.907	17.7713	17.7895	18.1233	16.8625	17.858	18.0417	16.3189	15.1912	18.3914	15.9375
94_SLFZ_01	3	0.6771	2.7994	3.1755	3.6716	8.4396	8.5512	9.0819	8.3598	2.4629	10.8922	3.3705	0.6962	0.5327	0.1689	0.1735	1.838	0.4375	3.9844	1.1114	5.3015	2.3788	1.0576	0.8139	0.9869	0.9521	1.3368	0.9286	0.8453	1.0098	1.5589	1.0094	1.0094	1.1629	1.1669	2.8463	6.1035	10.2637	2.3093	2.1593	0.8245	0.9506	0.9095	0.8263	0.7933	1.0798	0.7857	0.8723	0.8723
94_SLFZ_02	5	3.4384	4.2415	10.0908	9.4326	9.303	9.9627	9.9608	9.5992	25.2764	10.058	9.3259	10.0959	12.5256	9.7509	12.1197	0.2128	6.082	1.697	10.1615	5.3015	17.5333	11.1398	10.7774	9.8902	9.1737	10.1642	15.8789	15.9256	11.0941	13.3783	4.5576	10.7235	10.9335	9.8012	12.6589	8.276	8.2395	6.7767	5.3542	11.7584	9.9593	8.678	11.1942	8.6234	6.6771	6.8867	9.903	4.9924
95_SLFZ_01	3	0.8591	4.444	4.1643	4.2538	0.6522	0.6041	0.7649	0.603	5.395	6.484	0.1804	0.5527	0.5527	0.2735	0.2754	5.6218	0.0235	0.1596	0.4626	3.5418	4.8656	0.1289	0.0551	0.2759	0.7812	0.6886	3.7554	3.7199	0.044	4.7939	0.2894	0.2894	0.0451	0.3059	1.8804	1.4861	7.1731	3.3631	3.9502	0.0037	0.2031	0.2872	0.0244	0.4686	0.6915	0.1941	0.2507	0.2507
[truncated: 55 more columns]

## Sheet: 3-coord
		5_SLFZ_01	7_SLFZ_01	9_SLFZ_01	24_SLFZ_01	37_SLFZ_01	38_SLFZ_01	52_SLFZ_01	80_SLFZ_01	80_SLFZ_02	83_SLFZ_01	83_SLFZ_02	90_SLFZ_01	92_SLFZ_01	94_SLFZ_01	95_SLFZ_01
		3	3	3	3	3	3	3	3	3	3	3	3	3	3	3
5_SLFZ_01	3		3.9563	10.1684	16.0942	3.3241	0.2269	0.1157	25.1289	21.8898	5.9628	5.9628	5.8546	8.111	1.838	5.6218
7_SLFZ_01	3	3.9563		4.1606	8.2478	0.0731	2.3355	2.8947	17.3457	13.3248	0.2172	0.2172	0.1948	0.8276	3.9844	0.1596
9_SLFZ_01	3	10.1684	4.1606		1.47	3.757	8.4038	9.3951	5.8721	7.3821	3.6492	3.6492	3.8211	3.0194	5.3015	3.5418
24_SLFZ_01	3	16.0942	8.2478	1.47		7.9567	13.9855	15.1446	2.2489	4.4722	7.2139	7.2139	7.4289	6.0388	10.2637	7.1731
37_SLFZ_01	3	3.3241	0.0731	3.757	7.9567		1.8955	2.4296	16.6721	13.0253	0.438	0.438	0.4273	1.1099	3.0041	0.337
38_SLFZ_01	3	0.2269	2.3355	8.4038	13.9855	1.8955		0.0357	23.3159	19.7079	3.9474	3.9474	3.8507	5.7888	1.8545	3.6762
52_SLFZ_01	3	0.1157	2.8947	9.3951	15.1446	2.4296	0.0357		24.605	20.9484	4.6604	4.6604	4.5487	6.6598	2.1025	4.3731
80_SLFZ_01	3	25.1289	17.3457	5.8721	2.2489	16.6721	23.3159	24.605		4.0336	16.0444	16.0444	16.3718	14.2157	16.4845	15.9466
80_SLFZ_02	3	21.8898	13.3248	7.3821	4.4722	13.0253	19.7079	20.9484	4.0336		12.015	12.015	12.2662	10.4882	15.2152	11.9965
83_SLFZ_01	3	5.9628	0.2172	3.6492	7.2139	0.438	3.9474	4.6604	16.0444	12.015		0	0.0029	0.212	5.4451	0.0073
83_SLFZ_02	3	5.9628	0.2172	3.6492	7.2139	0.438	3.9474	4.6604	16.0444	12.015	0		0.0029	0.212	5.4451	0.0073
90_SLFZ_01	3	5.8546	0.1948	3.8211	7.4289	0.4273	3.8507	4.5487	16.3718	12.2662	0.0029	0.0029		0.2536	5.4818	0.0109
92_SLFZ_01	3	8.111	0.8276	3.0194	6.0388	1.1099	5.7888	6.6598	14.2157	10.4882	0.212	0.212	0.2536		6.688	0.2627
94_SLFZ_01	3	1.838	3.9844	5.3015	10.2637	3.0041	1.8545	2.1025	16.4845	15.2152	5.4451	5.4451	5.4818	6.688		5.0656
95_SLFZ_01	3	5.6218	0.1596	3.5418	7.1731	0.337	3.6762	4.3731	15.9466	11.9965	0.0073	0.0073	0.0109	0.2627	5.0656

## Sheet: 4-coord
		1p_DFT_02	3p_DFT_01	3p_DFT_02	4p_DFT_01	5p_DFT_01	1_SLFZ_02	2_SLFZ_01	23_SLFZ_02	42_SLFZ_01	43_SLFZ_01	48_SLFZ_01	49_SLFZ_01	56_SLFZ_01	57_SLFZ_01	58_SLFZ_01	59_SLFZ_01	60_SLFZ_01	61_SLFZ_01	62_SLFZ_01	63_SLFZ_01	64_SLFZ_01	65_SLFZ_01	65_SLFZ_02	66_SLFZ_01	67_SLFZ_01	67_SLFZ_02	69_SLFZ_01	72_SLFZ_01	73_SLFZ_01	75_SLFZ_01	78_SLFZ_01	82_SLFZ_01	84_SLFZ_01
		4	4	4	4	4	4	4	4	4	4	4	4	4	4	4	4	4	4	4	4	4	4	4	4	4	4	4	4	4	4	4	4	4
1p_DFT_02	4		22.4054	20.5877	21.0947	21.8023	18.9248	20.684	16.4339	19.7427	12.1516	3.479	22.4029	4.6875	4.8798	4.8579	4.8661	7.5872	15.181	13.9994	13.5066	3.8289	13.371	14.0231	21.7156	10.5221	17.1635	19.493	12.3445	19.7824	5.319	16.2127	18.3865	23.5392
3p_DFT_01	4	22.4054		0.1684	0.0926	0.1511	10.9117	3.1928	3.4059	1.9363	8.611	21.6072	5.242	18.8145	19.2173	19.7314	20.0764	11.2991	7.6094	23.1965	24.4839	23.2863	21.8706	21.7273	13.1206	5.9531	5.7374	1.4699	24.6398	1.372	24.8881	7.1419	4.1706	1.949
3p_DFT_02	4	20.5877	0.1684		0.0787	0.1356	12.8292	3.5917	3.0358	1.5633	10.2988	19.3709	5.4834	16.9119	17.3147	17.8099	18.1386	12.6891	8.5103	24.1532	25.4455	21.0715	24.2017	21.4521	13.6029	5.1244	6.3714	1.2677	25.6786	1.0384	26.4729	7.4273	3.8214	2.2973
4p_DFT_01	4	21.0947	0.0926	0.0787		0.2712	11.672	3.4813	3.0003	1.8376	9.7162	20.4267	5.9437	17.7424	18.175	18.6731	19.021	12.2575	8.367	24.3419	25.6766	22.0908	23.0695	21.401	13.0201	5.694	6.2629	1.4505	25.8942	1.2609	25.9904	6.8214	3.8423	1.976
5p_DFT_01	4	21.8023	0.1511	0.1356	0.2712		12.257	3.4856	3.8227	1.7993	9.4742	20.3014	4.8279	17.7268	18.1074	18.6124	18.9397	12.1262	8.0533	24.4461	25.7841	21.9931	23.3045	21.5483	14.1792	5.4331	6.2267	1.4107	25.9527	1.2588	25.5755	8.365	4.5366	2.3414
1_SLFZ_02	4	18.9248	10.9117	12.8292	11.672	12.257		13.322	12.294	14.3466	9.9298	21.9843	18.3132	19.2675	18.2729	18.2964	18.1432	13.9932	15.2644	8.5168	9.0787	22.3302	6.4821	7.3579	17.0989	12.9676	15.9524	15.1902	8.3339	15.6045	20.5775	16.3831	14.5968	8.6697
2_SLFZ_01	4	20.684	3.1928	3.5917	3.4813	3.4856	13.322		4.1773	5.4022	4.3311	19.6057	2.9799	17.3594	17.2702	17.7688	17.9791	7.628	3.7221	19.7566	21.3026	22.1477	19.1031	17.3666	5.2811	6.7619	7.6965	2.5358	21.7634	4.1536	23.7457	3.5486	5.6086	2.3386
23_SLFZ_02	4	16.4339	3.4059	3.0358	3.0003	3.8227	12.294	4.1773		1.8808	11.5025	19.6217	5.5278	18.4574	18.4788	19.0292	19.1919	11.9138	8.2062	27.3101	28.6224	21.6986	22.2946	23.0115	11.9373	4.4131	4.952	1.9017	25.3839	1.9596	25.299	3.5478	0.9742	6.302
42_SLFZ_01	4	19.7427	1.9363	1.5633	1.8376	1.7993	14.3466	5.4022	1.8808		13.2311	18.5401	4.568	18.0824	18.1901	18.7568	18.9279	13.1376	8.3966	29.7938	31.0432	20.9856	26.4985	25.0431	17.1371	3.305	4.0041	0.9731	30.1105	0.3541	27.3066	7.5391	1.1543	6.5978
43_SLFZ_01	4	12.1516	8.611	10.2988	9.7162	9.4742	9.9298	4.3311	11.5025	13.2311		12.0907	7.5269	16.6144	16.7515	16.7511	16.6326	3.0793	3.6554	10.9192	11.7169	13.5745	11.5183	11.8874	6.9065	14.1981	8.5203	9.7096	12.5688	11.8601	14.6003	8.5574	13.6118	6.7196
48_SLFZ_01	4	3.479	21.6072	19.3709	20.4267	20.3014	21.9843	19.6057	19.6217	18.5401	12.0907		22.1652	1.1013	1.0943	1.0885	1.0314	4.3799	10.59	11.5631	11.3053	0.2236	13.8784	14.9062	21.2219	10.1991	12.8063	17.7898	12.3569	17.9207	1.3411	20.8657	19.144	22.2332
49_SLFZ_01	4	22.4029	5.242	5.4834	5.9437	4.8279	18.3132	2.9799	5.5278	4.568	7.5269	22.1652		20.6773	20.5215	21.0615	21.1715	10.4774	5.4932	28.2454	29.583	23.9618	25.351	23.7398	11.5215	4.35	5.9958	3.9359	26.477	4.9228	27.6464	7.0603	5.3406	8.1621
56_SLFZ_01	4	4.6875	18.8145	16.9119	17.7424	17.7268	19.2675	17.3594	18.4574	18.0824	16.6144	1.1013	20.6773		0.0526	0.045	0.0864	7.0037	13.7183	7.8712	7.6151	0.6651	8.7668	9.2751	24.9394	10.7745	13.9592	15.7865	7.843	16.5426	2.1395	21.4524	19.0753	17.9201
57_SLFZ_01	4	4.8798	19.2173	17.3147	18.175	18.1074	18.2729	17.2702	18.4788	18.1901	16.7515	1.0943	20.5215	0.0526		0.0069	0.0126	7.0097	13.6874	8.0008	7.7879	0.66	8.7577	9.305	24.6846	10.9335	13.7971	15.6978	7.9812	16.5734	1.9301	21.4575	19.0182	18.2657
58_SLFZ_01	4	4.8579	19.7314	17.8099	18.6731	18.6124	18.2964	17.7688	19.0292	18.7568	16.7511	1.0885	21.0615	0.045	0.0069		0.0078	7.05	13.8451	7.9055	7.6545	0.6023	8.7059	9.3197	25.0564	11.3123	14.02	16.2582	7.8605	17.1366	1.794	21.9435	19.5937	18.7155
59_SLFZ_01	4	4.8661	20.0764	18.1386	19.021	18.9397	18.1432	17.9791	19.1919	18.9279	16.6326	1.0314	21.1715	0.0864	0.0126	0.0078		6.9567	13.7494	8.1303	7.8777	0.5572	8.8726	9.523	24.9951	11.422	13.9622	16.4132	8.0574	17.312	1.6467	22.1315	19.6959	19.1091
60_SLFZ_01	4	7.5872	11.2991	12.6891	12.2575	12.1262	13.9932	7.628	11.9138	13.1376	3.0793	4.3799	10.4774	7.0037	7.0097	7.05	6.9567		1.9093	9.264	9.6755	5.3209	10.3575	10.792	11.8487	9.6994	5.9097	9.8238	10.5137	11.6538	6.6705	11.4413	12.8785	10.8901
61_SLFZ_01	4	15.181	7.6094	8.5103	8.367	8.0533	15.2644	3.7221	8.2062	8.3966	3.6554	10.59	5.4932	13.7183	13.6874	13.8451	13.7494	1.9093		14.1383	15.0313	12.2138	14.4049	13.8347	9.2661	10.7927	4.5846	5.4014	15.5947	7.1635	11.6693	7.5191	8.1591	7.7668
62_SLFZ_01	4	13.9994	23.1965	24.1532	24.3419	24.4461	8.5168	19.7566	27.3101	29.7938	10.9192	11.5631	28.2454	7.8712	8.0008	7.9055	8.1303	9.264	14.1383		0.0713	11.2872	0.7766	1.2963	20.7294	24.0154	21.7888	23.881	0.4248	26.2544	9.1363	25.9447	30.9563	18.09
63_SLFZ_01	4	13.5066	24.4839	25.4455	25.6766	25.7841	9.0787	21.3026	28.6224	31.0432	11.7169	11.3053	29.583	7.6151	7.7879	7.6545	7.8777	9.6755	15.0313	0.0713		10.8398	0.9215	1.6603	22.27	24.628	22.2747	25.3137	0.3324	27.6086	8.6568	27.3214	31.8485	19.6264
64_SLFZ_01	4	3.8289	23.2863	21.0715	22.0908	21.9931	22.3302	22.1477	21.6986	20.9856	13.5745	0.2236	23.9618	0.6651	0.66	0.6023	0.5572	5.3209	12.2138	11.2872	10.8398		12.1548	13.1446	24.4356	12.1619	13.9983	19.5512	10.9317	19.9901	0.7078	24.0763	21.6296	23.6381
65_SLFZ_01	4	13.371	21.8706	24.2017	23.0695	23.3045	6.4821	19.1031	22.2946	26.4985	11.5183	13.8784	25.351	8.7668	8.7577	8.7059	8.8726	10.3575	14.4049	0.7766	0.9215	12.1548		0.3077	21.1961	20.5088	20.4895	22.4421	0.3137	24.5954	11.6648	25.1058	24.9138	17.7023
65_SLFZ_02	4	14.0231	21.7273	21.4521	21.401	21.5483	7.3579	17.3666	23.0115	25.0431	11.8874	14.9062	23.7398	9.2751	9.305	9.3197	9.523	10.792	13.8347	1.2963	1.6603	13.1446	0.3077		19.4777	21.2603	20.3364	20.5947	0.9948	22.799	13.5597	23.8034	25.0746	15.8684
66_SLFZ_01	4	21.7156	13.1206	13.6029	13.0201	14.1792	17.0989	5.2811	11.9373	17.1371	6.9065	21.2219	11.5215	24.9394	24.6846	25.0564	24.9951	11.8487	9.2661	20.7294	22.27	24.4356	21.1961	19.4777		16.4728	17.5953	12.7274	23.0661	15.5047	27.1388	4.4685	14.4595	8.4618
67_SLFZ_01	4	10.5221	5.9531	5.1244	5.694	5.4331	12.9676	6.7619	4.4131	3.305	14.1981	10.1991	4.35	10.7745	10.9335	11.3123	11.422	9.6994	10.7927	24.0154	24.628	12.1619	20.5088	21.2603	16.4728		8.1178	4.3328	23.0394	4.1856	17.1308	7.8336	3.539	10.3411
67_SLFZ_02	4	17.1635	5.7374	6.3714	6.2629	6.2267	15.9524	7.6965	4.952	4.0041	8.5203	12.8063	5.9958	13.9592	13.7971	14.02	13.9622	5.9097	4.5846	21.7888	22.2747	13.9983	20.4895	20.3364	17.5953	8.1178		4.8493	21.9079	4.6584	16.1311	8.8478	4.1416	10.7457
69_SLFZ_01	4	19.493	1.4699	1.2677	1.4505	1.4107	15.1902	2.5358	1.9017	0.9731	9.7096	17.7898	3.9359	15.7865	15.6978	16.2582	16.4132	9.8238	5.4014	23.881	25.3137	19.5512	22.4421	20.5947	12.7274	4.3328	4.8493		25.2813	0.2671	23.9543	6.0822	2.037	3.6775
72_SLFZ_01	4	12.3445	24.6398	25.6786	25.8942	25.9527	8.3339	21.7634	25.3839	30.1105	12.5688	12.3569	26.477	7.843	7.9812	7.8605	8.0574	10.5137	15.5947	0.4248	0.3324	10.9317	0.3137	0.9948	23.0661	23.0394	21.9079	25.2813		27.459	9.7645	27.5231	28.4394	20.4223
73_SLFZ_01	4	19.7824	1.372	1.0384	1.2609	1.2588	15.6045	4.1536	1.9596	0.3541	11.8601	17.9207	4.9228	16.5426	16.5734	17.1366	17.312	11.6538	7.1635	26.2544	27.6086	19.9901	24.5954	22.799	15.5047	4.1856	4.6584	0.2671	27.459		25.2576	7.36	1.7503	4.643
75_SLFZ_01	4	5.319	24.8881	26.4729	25.9904	25.5755	20.5775	23.7457	25.299	27.3066	14.6003	1.3411	27.6464	2.1395	1.9301	1.794	1.6467	6.6705	11.6693	9.1363	8.6568	0.7078	11.6648	13.5597	27.1388	17.1308	16.1311	23.9543	9.7645	25.2576		27.6509	27.418	24.3436
78_SLFZ_01	4	16.2127	7.1419	7.4273	6.8214	8.365	16.3831	3.5486	3.5478	7.5391	8.5574	20.8657	7.0603	21.4524	21.4575	21.9435	22.1315	11.4413	7.5191	25.9447	27.3214	24.0763	25.1058	23.8034	4.4685	7.8336	8.8478	6.0822	27.5231	7.36	27.6509		4.3232	7.2337
82_SLFZ_01	4	18.3865	4.1706	3.8214	3.8423	4.5366	14.5968	5.6086	0.9742	1.1543	13.6118	19.144	5.3406	19.0753	19.0182	19.5937	19.6959	12.8785	8.1591	30.9563	31.8485	21.6296	24.9138	25.0746	14.4595	3.539	4.1416	2.037	28.4394	1.7503	27.418	4.3232		8.6171
84_SLFZ_01	4	23.5392	1.949	2.2973	1.976	2.3414	8.6697	2.3386	6.302	6.5978	6.7196	22.2332	8.1621	17.9201	18.2657	18.7155	19.1091	10.8901	7.7668	18.09	19.6264	23.6381	17.7023	15.8684	8.4618	10.3411	10.7457	3.6775	20.4223	4.643	24.3436	7.2337	8.6171

## Sheet: 5-coord
		1_SLFZ_01	3_SLFZ_01	3_SLFZ_02	4_SLFZ_01	4_SLFZ_02	6_SLFZ_01	8_SLFZ_01	11_SLFZ_01	12_SLFZ_01	13_SLFZ_01	14_SLFZ_01	15_SLFZ_01	16_SLFZ_01	17_SLFZ_01	18_SLFZ_01	19_SLFZ_01	20_SLFZ_02	21_SLFZ_01	22_SLFZ_01	23_SLFZ_01	25_SLFZ_01	25_SLFZ_02	28_SLFZ_01	29_SLFZ_01	30_SLFZ_01	31_SLFZ_01	32_SLFZ_01	33_SLFZ_01	34_SLFZ_01	35_SLFZ_01	35_SLFZ_02	36_SLFZ_01	39_SLFZ_01	39_SLFZ_02	40_SLFZ_01	40_SLFZ_02	41_SLFZ_01	41_SLFZ_02	44_SLFZ_01	46_SLFZ_01	47_SLFZ_01	50_SLFZ_01	89_SLFZ_01	89_SLFZ_02	89_SLFZ_03	89_SLFZ_04	93_SLFZ_01	93_SLFZ_02
		5	5	5	5	5	5	5	5	5	5	5	5	5	5	5	5	5	5	5	5	5	5	5	5	5	5	5	5	5	5	5	5	5	5	5	5	5	5	5	5	5	5	5	5	5	5	5	5
1_SLFZ_01	5		20.002	19.6962	18.5543	18.9241	21.8059	21.6703	21.5033	20.6006	22.194	23.2777	22.1711	9.3007	8.8896	20.9541	11.3188	22.8796	20.9243	21.5656	12.7937	22.9479	22.9276	20.9226	22.032	21.2393	21.2726	21.6855	21.8243	19.9393	21.7474	21.5129	22.8899	19.7897	13.8665	19.8205	14.1849	20.6931	21.2819	21.3477	18.5634	23.4819	21.6754	18.2288	16.4	19.3285	16.5891	16.7445	13.4151
3_SLFZ_01	5	20.002		3.456	1.3482	4.0842	4.9163	8.905	9.7769	10.7397	9.9828	8.6086	8.2256	18.1186	17.8873	10.735	16.0824	5.2267	10.839	9.9193	18.0238	8.0661	7.6437	11.3142	10.1934	11.2169	10.8258	9.9321	11.1432	11.9455	9.6067	8.382	7.1494	5.5765	20.7783	5.612	20.9307	10.7743	10.7054	12.799	14.4724	7.6801	13.2082	11.5573	16.3181	9.6789	14.4379	12.3911	19.3749
3_SLFZ_02	5	19.6962	3.456		3.2001	1.1423	2.1206	8.5322	8.2058	7.3146	7.3889	8.5406	9.2343	15.7546	16.0171	7.4614	15.7671	8.3941	7.7592	8.1874	13.9952	9.9756	9.9351	6.8612	7.2812	6.6499	6.8574	7.4025	6.7788	6.7632	7.7462	10.692	11.3356	7.3737	23.4441	7.4127	23.4954	9.5259	9.3955	14.305	14.6872	9.445	15.2594	14.5629	10.3021	12.9089	8.5626	12.7921	20.7856
4_SLFZ_01	5	18.5543	1.3482	3.2001		3.2179	4.4117	7.66	8.1425	8.9989	8.7398	7.6799	7.0079	14.002	14.0108	9.0823	14.0563	5.5864	9.1229	8.7273	14.1759	10.1452	9.043	8.2768	8.7396	9.0569	8.3342	9.0768	10.0474	10.115	8.3781	8.4899	9.8172	7.2722	20.5731	7.4385	20.8419	9.0908	8.9812	13.5264	12.4718	9.6155	11.6559	9.442	12.3451	7.6773	10.8381	13.1368	18.2957
4_SLFZ_02	5	18.9241	4.0842	1.1423	3.2179		2.7052	9.1192	9.0199	7.9741	8.4323	9.6455	9.5846	16.427	16.1619	8.2914	15.6624	6.1558	8.5978	9.0726	12.1034	10.1799	10.1007	7.5115	8.1986	7.6979	7.7296	8.3365	8.2861	7.5991	8.6153	8.7489	10.1839	7.7696	20.9925	7.9404	20.7922	9.8134	9.6594	13.2949	14.8521	9.6423	14.875	12.6542	9.1081	11.0497	7.3018	9.8522	20.1787
6_SLFZ_01	5	21.8059	4.9163	2.1206	4.4117	2.7052		7.3313	6.9823	6.351	5.7281	5.9678	8.0758	14.4335	14.39	6.6016	13.3568	9.7348	7.036	6.6418	11.2794	7.7773	8.2182	6.2445	5.6839	5.3078	5.946	5.3946	5.6389	7.1871	6.0342	8.5906	6.3459	9.3272	19.2492	9.4414	19.2277	8.7775	8.8101	9.5742	9.1307	7.5496	14.1542	15.5436	12.7266	14.7433	11.7453	14.711	20.234
8_SLFZ_01	5	21.6703	8.905	8.5322	7.66	9.1192	7.3313		0.0828	0.1803	0.1606	0.2548	0.0731	10.3481	10.4236	0.1598	8.7703	6.8124	0.1863	0.0639	7.8797	6.3159	8.3174	0.3576	0.1702	0.3876	0.2463	0.1809	1.0682	0.9238	0.0923	4.4326	8.0786	8.635	13.9784	8.7317	13.5243	0.3877	0.4436	8.5656	8.2876	6.1438	4.8223	7.5599	8.6282	5.4658	6.9022	17.4643	17.5064
11_SLFZ_01	5	21.5033	9.7769	8.2058	8.1425	9.0199	6.9823	0.0828		0.0783	0.1236	0.3254	0.1853	10.7576	10.8066	0.0494	9.2611	7.8149	0.0788	0.1065	7.4979	7.0979	9.1618	0.118	0.0943	0.4237	0.0706	0.2589	1.2414	1.0859	0.0619	5.2771	9.4538	9.3462	14.653	9.4674	14.1704	0.3367	0.359	9.4753	9.0404	6.9164	4.4308	7.4971	8.3864	5.5404	6.8539	17.9785	17.6211
12_SLFZ_01	5	20.6006	10.7397	7.3146	8.9989	7.9741	6.351	0.1803	0.0783		0.2009	0.5211	0.3899	10.3181	10.3226	0.0334	8.7762	8.2748	0.0777	0.15	7.3083	7.4819	9.0082	0.0647	0.1545	0.3333	0.0627	0.2462	1.1428	0.852	0.1175	5.3163	9.4345	9.3666	14.5223	9.224	14.0281	0.41	0.4178	9.0171	8.8042	7.3628	4.726	7.832	8.5031	5.8904	6.9589	18.2578	17.4035
13_SLFZ_01	5	22.194	9.9828	7.3889	8.7398	8.4323	5.7281	0.1606	0.1236	0.2009		0.1359	0.3144	10.789	10.8877	0.1498	9.2726	8.3245	0.2154	0.0939	7.8832	6.1562	8.4643	0.2693	0.0126	0.2083	0.1113	0.081	0.8078	1.0117	0.0369	5.5165	8.703	9.1784	15.7508	9.2988	15.2999	0.6696	0.7087	9.4473	8.2351	6.0144	5.2423	8.856	9.3771	6.6939	7.7039	18.6198	18.0368
14_SLFZ_01	5	23.2777	8.6086	8.5406	7.6799	9.6455	5.9678	0.2548	0.3254	0.5211	0.1359		0.2935	10.7814	10.9293	0.4944	9.0919	7.7937	0.6038	0.307	8.1118	5.0324	8.8777	0.6355	0.1668	0.5412	0.4052	0.188	1.2081	1.595	0.1537	5.7511	8.2018	7.8685	16.5805	7.9944	16.1686	1.0186	1.1126	8.7276	7.8762	4.8845	5.4627	9.3862	10.2739	7.0457	8.4962	18.9238	19.3389
15_SLFZ_01	5	22.1711	8.2256	9.2343	7.0079	9.5846	8.0758	0.0731	0.1853	0.3899	0.3144	0.2935		10.4821	10.5588	0.3503	8.749	6.3523	0.3624	0.1985	7.4943	6.0876	9.0592	0.5696	0.3083	0.6761	0.4537	0.3637	1.4688	1.3728	0.2123	4.4821	8.4503	7.8792	13.8734	7.9696	13.4203	0.3644	0.4438	8.4353	8.4973	5.876	4.5158	7.2422	8.2833	5.1461	6.6402	17.6786	17.9165
16_SLFZ_01	5	9.3007	18.1186	15.7546	14.002	16.427	14.4335	10.3481	10.7576	10.3181	10.789	10.7814	10.4821		0.0205	10.6866	0.2991	12.0353	10.8331	10.4784	11.7762	8.2701	9.9644	10.9372	10.7513	10.3875	10.8418	10.0655	10.9546	10.1062	10.4777	11.2444	12.6315	9.023	10.8441	9.0318	10.9515	11.1608	11.0913	7.6906	3.1242	8.2232	15.4782	11.9708	10.438	11.0064	9.4319	18.5667	16.4989
17_SLFZ_01	5	8.8896	17.8873	16.0171	14.0108	16.1619	14.39	10.4236	10.8066	10.3226	10.8877	10.9293	10.5588	0.0205		10.713	0.3389	12.3297	10.8546	10.5452	11.3715	8.6919	10.283	10.9349	10.8262	10.4591	10.8821	10.151	11.0978	10.2479	10.5506	11.4433	12.8298	9.425	10.4584	9.4278	10.5529	11.1181	11.0579	7.5839	3.3506	8.6709	15.4519	11.8024	10.3258	10.8863	9.3687	18.4461	16.3292
18_SLFZ_01	5	20.9541	10.735	7.4614	9.0823	8.2914	6.6016	0.1598	0.0494	0.0334	0.1498	0.4944	0.3503	10.6866	10.713		9.1716	8.2359	0.0146	0.0929	7.5485	7.5623	8.7317	0.0809	0.121	0.2743	0.0495	0.2521	0.9855	0.7812	0.1137	5.1672	9.4635	9.3177	14.3747	9.1602	13.879	0.3363	0.3349	9.7067	8.9852	7.407	4.7005	7.6634	8.2168	5.7437	6.6861	17.876	17.0029
19_SLFZ_01	5	11.3188	16.0824	15.7671	14.0563	15.6624	13.3568	8.7703	9.2611	8.7762	9.2726	9.0919	8.749	0.2991	0.3389	9.1716		9.8131	9.2618	8.9505	11.0396	6.349	7.9328	9.4721	9.2253	8.9823	9.461	8.5315	9.275	7.8306	8.9123	9.5006	11.1163	6.6146	10.0804	6.5785	10.1049	9.5602	9.5101	6.2811	2.6707	6.2856	13.099	11.1884	9.7768	10.1482	8.7283	16.7073	19.036
20_SLFZ_02	5	22.8796	5.2267	8.3941	5.5864	6.1558	9.7348	6.8124	7.8149	8.2748	8.3245	7.7937	6.3523	12.0353	12.3297	8.2359	9.8131		8.0915	7.4615	12.8959	9.718	10.3662	9.1943	8.5042	8.4885	8.8803	7.9054	8.6479	7.6699	7.889	1.9753	7.1305	7.3064	17.2349	7.1481	16.6946	7.4682	7.5228	11.5117	12.5437	9.1	8.2864	10.9704	9.6977	8.861	7.7839	8.1553	15.919
21_SLFZ_01	5	20.9243	10.839	7.7592	9.1229	8.5978	7.036	0.1863	0.0788	0.0777	0.2154	0.6038	0.3624	10.8331	10.8546	0.0146	9.2618	8.0915		0.1043	7.6024	7.8536	8.6288	0.1319	0.1886	0.3056	0.1075	0.3338	0.9802	0.731	0.1831	4.9353	9.5405	9.345	13.8747	9.177	13.3714	0.2583	0.2486	10.0071	9.1864	7.6771	4.6257	7.3361	7.8404	5.4688	6.334	17.4972	16.5676
22_SLFZ_01	5	21.5656	9.9193	8.1874	8.7273	9.0726	6.6418	0.0639	0.1065	0.15	0.0939	0.307	0.1985	10.4784	10.5452	0.0929	8.9505	7.4615	0.1043		7.7605	6.5138	7.9394	0.3133	0.1075	0.1602	0.1871	0.1069	0.7011	0.6701	0.0876	4.5064	8.1936	9.2743	14.0091	9.3617	13.5476	0.373	0.408	9.0423	8.1579	6.3601	5.0828	7.977	8.541	5.8902	6.8419	17.6059	16.9652
23_SLFZ_01	5	12.7937	18.0238	13.9952	14.1759	12.1034	11.2794	7.8797	7.4979	7.3083	7.8832	8.1118	7.4943	11.7762	11.3715	7.5485	11.0396	12.8959	7.6024	7.7605		13.3189	12.4765	7.1519	7.4453	8.2963	7.5423	7.8561	10.4165	9.5351	7.3483	11.7176	16.5906	11.3884	10.5532	11.0931	10.1494	6.8778	6.3569	11.2931	13.784	12.9281	4.5024	9.2013	8.0399	8.8772	8.4095	16.3978	14.842
25_SLFZ_01	5	22.9479	8.0661	9.9756	10.1452	10.1799	7.7773	6.3159	7.0979	7.4819	6.1562	5.0324	6.0876	8.2701	8.6919	7.5623	6.349	9.718	7.8536	6.5138	13.3189		5.7301	8.1041	6.354	6.5184	7.3862	5.635	5.5054	6.2779	6.2169	9.7098	7.032	2.6193	16.238	2.6767	16.2399	8.4654	8.5642	6.9527	2.9786	0.0485	13.5792	18.539	16.5076	16.514	14.4491	21.1733	16.907
25_SLFZ_02	5	22.9276	7.6437	9.9351	9.043	10.1007	8.2182	8.3174	9.1618	9.0082	8.4643	8.8777	9.0592	9.9644	10.283	8.7317	7.9328	10.3662	8.6288	7.9394	12.4765	5.7301		9.9224	8.9353	7.1188	9.2505	7.8909	5.3376	5.4528	8.8862	5.7303	5.1783	3.832	14.932	3.78	14.8188	9.7655	9.8287	7.4049	5.5526	5.6228	12.2714	15.2277	18.1321	12.872	15.8312	14.6991	17.7713
28_SLFZ_01	5	20.9226	11.3142	6.8612	8.2768	7.5115	6.2445	0.3576	0.118	0.0647	0.2693	0.6355	0.5696	10.9372	10.9349	0.0809	9.4721	9.1943	0.1319	0.3133	7.1519	8.1041	9.9224		0.1948	0.5254	0.0386	0.4377	1.4636	1.2148	0.1978	6.2386	10.7136	9.5154	15.3875	9.3788	14.8765	0.5127	0.497	10.0267	9.6216	7.963	4.424	7.911	8.4646	6.0793	7.192	18.7695	17.7895
29_SLFZ_01	5	22.032	10.1934	7.2812	8.7396	8.1986	5.6839	0.1702	0.0943	0.1545	0.0126	0.1668	0.3083	10.7513	10.8262	0.121	9.2253	8.5042	0.1886	0.1075	7.4453	6.354	8.9353	0.1948		0.249	0.0735	0.1051	0.9482	1.1071	0.0228	5.7329	9.1756	9.2323	15.7518	9.3508	15.2905	0.5955	0.6308	9.3841	8.4065	6.2151	4.9864	8.7376	9.2101	6.6229	7.6176	18.871	18.1233
30_SLFZ_01	5	21.2393	11.2169	6.6499	9.0569	7.6979	5.3078	0.3876	0.4237	0.3333	0.2083	0.5412	0.6761	10.3875	10.4591	0.2743	8.9823	8.4885	0.3056	0.1602	8.2963	6.5184	7.1188	0.5254	0.249		0.3446	0.1296	0.2751	0.4233	0.2938	4.762	7.8039	8.0846	14.8278	7.9429	14.3714	0.8228	0.842	9.2416	7.5846	6.4394	6.2515	9.3678	9.1775	7.1634	7.381	18.2645	16.8625
31_SLFZ_01	5	21.2726	10.8258	6.8574	8.3342	7.7296	5.946	0.2463	0.0706	0.0627	0.1113	0.4052	0.4537	10.8418	10.8821	0.0495	9.461	8.8803	0.1075	0.1871	7.5423	7.3862	9.2505	0.0386	0.0735	0.3446		0.2566	1.1365	1.0614	0.0905	5.9485	9.9311	9.4063	15.6433	9.2634	15.1519	0.5563	0.557	9.8941	9.0819	7.2447	4.7679	8.2721	8.811	6.3107	7.3137	18.6722	17.858
32_SLFZ_01	5	21.6855	9.9321	7.4025	9.0768	8.3365	5.3946	0.1809	0.2589	0.2462	0.081	0.188	0.3637	10.0655	10.151	0.2521	8.5315	7.9054	0.3338	0.1069	7.8561	5.635	7.8909	0.4377	0.1051	0.1296	0.2566		0.6424	0.8095	0.0939	5.005	7.6969	8.9398	15.3572	9.0246	14.9209	0.7807	0.8427	8.2204	7.3662	5.5523	5.7842	9.2775	9.6301	6.9897	7.8194	18.7444	18.0417
33_SLFZ_01	5	21.8243	11.1432	6.7788	10.0474	8.2861	5.6389	1.0682	1.2414	1.1428	0.8078	1.2081	1.4688	10.9546	11.0978	0.9855	9.275	8.6479	0.9802	0.7011	10.4165	5.5054	5.3376	1.4636	0.9482	0.2751	1.1365	0.6424		0.3574	1.0386	4.2454	6.4774	7.2429	15.0409	7.0681	14.611	1.6941	1.7064	8.8789	7.2696	5.5605	8.1198	10.637	9.9165	8.274	7.8464	17.6962	16.3189
34_SLFZ_01	5	19.9393	11.9455	6.7632	10.115	7.5991	7.1871	0.9238	1.0859	0.852	1.0117	1.595	1.3728	10.1062	10.2479	0.7812	7.8306	7.6699	0.731	0.6701	9.5351	6.2779	5.4528	1.2148	1.1071	0.4233	1.0614	0.8095	0.3574		1.0833	3.3113	6.7622	7.1835	12.8717	6.9785	12.395	1.2586	1.2427	7.7795	7.9659	6.2937	7.3184	8.8358	8.6376	6.7335	6.6284	16.2757	15.1912
35_SLFZ_01	5	21.7474	9.6067	7.7462	8.3781	8.6153	6.0342	0.0923	0.0619	0.1175	0.0369	0.1537	0.2123	10.4777	10.5506	0.1137	8.9123	7.889	0.1831	0.0876	7.3483	6.2169	8.8862	0.1978	0.0228	0.2938	0.0905	0.0939	1.0386	1.0833		5.3473	8.7887	8.8319	15.4475	8.9398	14.9845	0.5399	0.5749	8.9012	8.3099	6.0728	4.7815	8.3959	9.0901	6.2993	7.475	18.3674	18.3914
35_SLFZ_02	5	21.5129	8.382	10.692	8.4899	8.7489	8.5906	4.4326	5.2771	5.3163	5.5165	5.7511	4.4821	11.2444	11.4433	5.1672	9.5006	1.9753	4.9353	4.5064	11.7176	9.7098	5.7303	6.2386	5.7329	4.762	5.9485	5.005	4.2454	3.3113	5.3473		4.7217	10.2674	12.3066	10.1085	11.7863	4.6993	4.6501	7.5378	9.878	9.2944	8.735	9.3823	8.284	7.4299	6.1361	9.4048	15.9375
36_SLFZ_01	5	22.8899	7.1494	11.3356	9.8172	10.1839	6.3459	8.0786	9.4538	9.4345	8.703	8.2018	8.4503	12.6315	12.8298	9.4635	11.1163	7.1305	9.5405	8.1936	16.5906	7.032	5.1783	10.7136	9.1756	7.8039	9.9311	7.6969	6.4774	6.7622	8.7887	4.7217		11.3147	19.2729	11.1926	19.0994	10.4055	10.4173	9.7177	7.4741	7.1084	17.1452	16.5292	19.4252	13.7658	16.0356	14.1988	21.7611
39_SLFZ_01	5	19.7897	5.5765	7.3737	7.2722	7.7696	9.3272	8.635	9.3462	9.3666	9.1784	7.8685	7.8792	9.023	9.425	9.3177	6.6146	7.3064	9.345	9.2743	11.3884	2.6193	3.832	9.5154	9.2323	8.0846	9.4063	8.9398	7.2429	7.1835	8.8319	10.2674	11.3147		17.0591	0.0093	16.9201	10.0919	9.981	9.5141	7.0234	2.2909	10.9348	15.0026	14.0834	13.7084	12.9707	19.2256	15.2621
39_SLFZ_02	5	13.8665	20.7783	23.4441	20.5731	20.9925	19.2492	13.9784	14.653	14.5223	15.7508	16.5805	13.8734	10.8441	10.4584	14.3747	10.0804	17.2349	13.8747	14.0091	10.5532	16.238	14.932	15.3875	15.7518	14.8278	15.6433	15.3572	15.0409	12.8717	15.4475	12.3066	19.2729	17.0591		16.9392	0.0205	12.077	12.3411	3.5083	13.1027	16.7158	14.2717	8.1061	10.5224	7.6866	11.2081	14.8621	13.2654
40_SLFZ_01	5	19.8205	5.612	7.4127	7.4385	7.9404	9.4414	8.7317	9.4674	9.224	9.2988	7.9944	7.9696	9.0318	9.4278	9.1602	6.5785	7.1481	9.177	9.3617	11.0931	2.6767	3.78	9.3788	9.3508	7.9429	9.2634	9.0246	7.0681	6.9785	8.9398	10.1085	11.1926	0.0093	16.9392		16.789	10.1602	10.0501	9.4224	7.0518	2.3499	10.9698	14.9721	14.0846	13.6628	12.9696	19.3611	15.0744
40_SLFZ_02	5	14.1849	20.9307	23.4954	20.8419	20.7922	19.2277	13.5243	14.1704	14.0281	15.2999	16.1686	13.4203	10.9515	10.5529	13.879	10.1049	16.6946	13.3714	13.5476	10.1494	16.2399	14.8188	14.8765	15.2905	14.3714	15.1519	14.9209	14.611	12.395	14.9845	11.7863	19.0994	16.9201	0.0205	16.789		11.5638	11.8143	3.5206	13.2517	16.7166	13.8132	7.8018	10.1021	7.3844	10.7886	14.6923	13.1992
41_SLFZ_01	5	20.6931	10.7743	9.5259	9.0908	9.8134	8.7775	0.3877	0.3367	0.41	0.6696	1.0186	0.3644	11.1608	11.1181	0.3363	9.5602	7.4682	0.2583	0.373	6.8778	8.4654	9.7655	0.5127	0.5955	0.8228	0.5563	0.7807	1.6941	1.2586	0.5399	4.6993	10.4055	10.0919	12.077	10.1602	11.5638		0.1189	9.5023	9.8824	8.2368	3.9676	6.37	7.0521	4.5955	5.7113	17.4796	15.9462
41_SLFZ_02	5	21.2819	10.7054	9.3955	8.9812	9.6594	8.8101	0.4436	0.359	0.4178	0.7087	1.1126	0.4438	11.0913	11.0579	0.3349	9.5101	7.5228	0.2486	0.408	6.3569	8.5642	9.8287	0.497	0.6308	0.842	0.557	0.8427	1.7064	1.2427	0.5749	4.6501	10.4173	9.981	12.3411	10.0501	11.8143	0.1189		9.5356	9.9675	8.3298	3.8129	6.0866	6.7418	4.4826	5.4437	16.903	16.3369
44_SLFZ_01	5	21.3477	12.799	14.305	13.5264	13.2949	9.5742	8.5656	9.4753	9.0171	9.4473	8.7276	8.4353	7.6906	7.5839	9.7067	6.2811	11.5117	10.0071	9.0423	11.2931	6.9527	7.4049	10.0267	9.3841	9.2416	9.8941	8.2204	8.8789	7.7795	8.9012	7.5378	9.7177	9.5141	3.5083	9.4224	3.5206	9.5023	9.5356		6.0421	7.3944	12.2042	8.2113	15.481	7.7721	13.8722	13.5587	12.9188
46_SLFZ_01	5	18.5634	14.4724	14.6872	12.4718	14.8521	9.1307	8.2876	9.0404	8.8042	8.2351	7.8762	8.4973	3.1242	3.3506	8.9852	2.6707	12.5437	9.1864	8.1579	13.784	2.9786	5.5526	9.6216	8.4065	7.5846	9.0819	7.3662	7.2696	7.9659	8.3099	9.878	7.4741	7.0234	13.1027	7.0518	13.2517	9.8824	9.9675	6.0421		3.2002	17.2919	15.8243	14.2049	13.8369	12.271	19.1425	19.3386
47_SLFZ_01	5	23.4819	7.6801	9.445	9.6155	9.6423	7.5496	6.1438	6.9164	7.3628	6.0144	4.8845	5.876	8.2232	8.6709	7.407	6.2856	9.1	7.6771	6.3601	12.9281	0.0485	5.6228	7.963	6.2151	6.4394	7.2447	5.5523	5.5605	6.2937	6.0728	9.2944	7.1084	2.2909	16.7158	2.3499	16.7166	8.2368	8.3298	7.3944	3.2002		12.869	18.7393	15.9325	16.6605	13.9516	21.3649	17.5147
50_SLFZ_01	5	21.6754	13.2082	15.2594	11.6559	14.875	14.1542	4.8223	4.4308	4.726	5.2423	5.4627	4.5158	15.4782	15.4519	4.7005	13.099	8.2864	4.6257	5.0828	4.5024	13.5792	12.2714	4.424	4.9864	6.2515	4.7679	5.7842	8.1198	7.3184	4.7815	8.735	17.1452	10.9348	14.2717	10.9698	13.8132	3.9676	3.8129	12.2042	17.2919	12.869		6.3125	10.4719	5.9259	9.6621	13.3983	16.9539
89_SLFZ_01	5	18.2288	11.5573	14.5629	9.442	12.6542	15.5436	7.5599	7.4971	7.832	8.856	9.3862	7.2422	11.9708	11.8024	7.6634	11.1884	10.9704	7.3361	7.977	9.2013	18.539	15.2277	7.911	8.7376	9.3678	8.2721	9.2775	10.637	8.8358	8.3959	9.3823	16.5292	15.0026	8.1061	14.9721	7.8018	6.37	6.0866	8.2113	15.8243	18.7393	6.3125		11.3727	0.3242	10.1934	11.9901	12.7697
89_SLFZ_02	5	16.4	16.3181	10.3021	12.3451	9.1081	12.7266	8.6282	8.3864	8.5031	9.3771	10.2739	8.2833	10.438	10.3258	8.2168	9.7768	9.6977	7.8404	8.541	8.0399	16.5076	18.1321	8.4646	9.2101	9.1775	8.811	9.6301	9.9165	8.6376	9.0901	8.284	19.4252	14.0834	10.5224	14.0846	10.1021	7.0521	6.7418	15.481	14.2049	15.9325	10.4719	11.3727		10.0175	0.2824	18.7466	20.4874
89_SLFZ_03	5	19.3285	9.6789	12.9089	7.6773	11.0497	14.7433	5.4658	5.5404	5.8904	6.6939	7.0457	5.1461	11.0064	10.8863	5.7437	10.1482	8.861	5.4688	5.8902	8.8772	16.514	12.872	6.0793	6.6229	7.1634	6.3107	6.9897	8.274	6.7335	6.2993	7.4299	13.7658	13.7084	7.6866	13.6628	7.3844	4.5955	4.4826	7.7721	13.8369	16.6605	5.9259	0.3242	10.0175		8.5575	10.879	12.1354
89_SLFZ_04	5	16.5891	14.4379	8.5626	10.8381	7.3018	11.7453	6.9022	6.8539	6.9589	7.7039	8.4962	6.6402	9.4319	9.3687	6.6861	8.7283	7.7839	6.334	6.8419	8.4095	14.4491	15.8312	7.192	7.6176	7.381	7.3137	7.8194	7.8464	6.6284	7.475	6.1361	16.0356	12.9707	11.2081	12.9696	10.7886	5.7113	5.4437	13.8722	12.271	13.9516	9.6621	10.1934	0.2824	8.5575		16.3929	18.8264
93_SLFZ_01	5	16.7445	12.3911	12.7921	13.1368	9.8522	14.711	17.4643	17.9785	18.2578	18.6198	18.9238	17.6786	18.5667	18.4461	17.876	16.7073	8.1553	17.4972	17.6059	16.3978	21.1733	14.6991	18.7695	18.871	18.2645	18.6722	18.7444	17.6962	16.2757	18.3674	9.4048	14.1988	19.2256	14.8621	19.3611	14.6923	17.4796	16.903	13.5587	19.1425	21.3649	13.3983	11.9901	18.7466	10.879	16.3929		7.4726
93_SLFZ_02	5	13.4151	19.3749	20.7856	18.2957	20.1787	20.234	17.5064	17.6211	17.4035	18.0368	19.3389	17.9165	16.4989	16.3292	17.0029	19.036	15.919	16.5676	16.9652	14.842	16.907	17.7713	17.7895	18.1233	16.8625	17.858	18.0417	16.3189	15.1912	18.3914	15.9375	21.7611	15.2621	13.2654	15.0744	13.1992	15.9462	16.3369	12.9188	19.3386	17.5147	16.9539	12.7697	20.4874	12.1354	18.8264	7.4726
94_SLFZ_02	5	25.2764	10.0959	12.5256	9.7509	12.1197	6.082	10.1615	11.1398	10.7774	9.8902	9.1737	10.1642	15.8789	15.9256	11.0941	13.3783	10.7235	10.9335	9.8012	12.6589	6.7767	5.3542	11.7584	9.9593	8.678	11.1942	8.6234	6.6771	6.8867	9.903	4.9924	3.6973	12.9964	16.1855	12.7784	15.9106	11.2582	11.4363	7.0927	8.4307	7.2508	14.2565	15.4528	18.2169	15.8632	15.1998	17.2271	17.9056
[truncated: 1 more columns]

## Sheet: 6-coord
		1p_DFT_01	2p_DFT_01	2p_DFT_02	10_SLFZ_01	20_SLFZ_01
		6	6	6	6	6
1p_DFT_01	6		18.4287	20.422	13.4763	14.2903
2p_DFT_01	6	18.4287		0.5459	19.9722	18.3496
2p_DFT_02	6	20.422	0.5459		19.9104	18.8703
10_SLFZ_01	6	13.4763	19.9722	19.9104		18.6788
20_SLFZ_01	6	14.2903	18.3496	18.8703	18.6788
