# Supplementary material for: The extensive solid-form landscape of sulfathiazole: hydrogen-bond topology and node shape
Source: Royal Society of Chemistry journal article supplement (doi:10.1039/d2ce00964a), 2022-01-01
Supplement: d2ce00964a6.pdf [file d2ce00964a6.pdf]

## The extensive solid-form landscape of sulfathiazole: hydrogen-bond topology and node shape

David S. Hughes,<sup>\*ab</sup> Ann L. Bingham,<sup>b</sup> Michael B. Hursthouse,<sup>b</sup> Terry L. Threlfall<sup>b</sup>  
and Andrew D. Bond<sup>\*a</sup>

Email: dh536@cam.ac.uk; adb29@cam.ac.uk

### Electronic Supplementary Information

|    |                                                                 |
|----|-----------------------------------------------------------------|
| S1 | Summary of the multi-component sulfathiazole crystals           |
| S2 | Crystallographic information for the new crystal structures     |
| S3 | Geometrical parameters of hydrogen bonds between SLFZ molecules |
| S4 | Hydrogen-bond connectivity tables for SLFZ molecules            |
| S5 | Summary of SLFZ molecule connectivity and networks              |
| S6 | Node shape comparisons                                          |

## S1. Summary of new sulfathiazole multi-component crystals

The structures considered in this paper are described in:

*The extensive solid-form landscape of sulfathiazole: geometrical similarity and interaction energies*

David S. Hughes, Ann L. Bingham, Michael B. Hursthouse, Terry L. Threlfall and Andrew D. Bond

CrystEngComm, 2022, 24, 609–619. <https://doi.org/10.1039/D1CE01516H>

Five new structures are added (3 from the CSD, 2 new structure determinations):

|                                                                                   |                                                                                   |                                                                                    |                                                                                     |                                                                                     |
|-----------------------------------------------------------------------------------|-----------------------------------------------------------------------------------|------------------------------------------------------------------------------------|-------------------------------------------------------------------------------------|-------------------------------------------------------------------------------------|
| 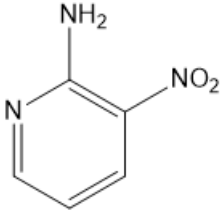 |  |  |  |  |
| <b>92 (co-crystal)</b>                                                            | <b>93 (co-crystal)</b>                                                            | <b>94 (co-crystal)</b>                                                             | <b>95 (co-crystal)</b>                                                              | <b>96 (salt)</b>                                                                    |

|           | CSD Refcode | Space Group | Partner                 |                                                                   | Stoichiometry | Cell dimensions |        |        |          |         |          | Z | V      |
|-----------|-------------|-------------|-------------------------|-------------------------------------------------------------------|---------------|-----------------|--------|--------|----------|---------|----------|---|--------|
|           |             |             |                         |                                                                   |               | a               | b      | c      | $\alpha$ | $\beta$ | $\gamma$ |   |        |
| <b>92</b> | TAPCIA      | P-1         | 3-nitropyridine-2-amine | C <sub>5</sub> H <sub>5</sub> N <sub>3</sub> O <sub>2</sub>       | 1:1           | 8.335           | 9.746  | 10.535 | 101.76   | 93.93   | 93.84    | 2 | 832.9  |
| <b>93</b> | TAPCUM      | P-1         | 5-nitropyridine-2-amine | C <sub>5</sub> H <sub>5</sub> N <sub>3</sub> O <sub>2</sub>       | 2:1           | 8.287           | 11.542 | 15.414 | 79.82    | 88.64   | 76.53    | 2 | 1410.9 |
| <b>94</b> | TAPDEX      | P21/n       | 4,4'-bipyridine         | C <sub>10</sub> H <sub>8</sub> N <sub>2</sub>                     | 2:1           | 8.411           | 31.674 | 11.638 | 90       | 95.11   | 90       | 4 | 3087.9 |
| <b>95</b> | —           | Pbca        | N-methylacetamide       | C <sub>3</sub> H <sub>7</sub> NO                                  | 1:1           | 10.602          | 8.164  | 35.137 | 90       | 90      | 90       | 8 | 3041.4 |
| <b>96</b> | —           | P-1         | guanidinium hydrate     | [CH <sub>6</sub> N <sub>3</sub> ] <sup>+</sup> / H <sub>2</sub> O | 1:1:1         | 7.630           | 8.777  | 11.305 | 101.35   | 93.00   | 97.45    | 2 | 733.6  |

## S2. Crystallographic information for the new crystal structures

|                                                    | 95                                                                           | 96                                                                           |
|----------------------------------------------------|------------------------------------------------------------------------------|------------------------------------------------------------------------------|
| CCDC number                                        | 2189394                                                                      | 2189393                                                                      |
| Chemical formula                                   | C <sub>12</sub> H <sub>16</sub> N <sub>4</sub> O <sub>3</sub> S <sub>2</sub> | C <sub>10</sub> H <sub>16</sub> N <sub>6</sub> O <sub>3</sub> S <sub>2</sub> |
| Formula weight                                     | 328.41                                                                       | 332.41                                                                       |
| Temperature / K                                    | 150(2)                                                                       | 150(2)                                                                       |
| Crystal system                                     | orthorhombic                                                                 | triclinic                                                                    |
| Space group                                        | P b c a                                                                      | P -1                                                                         |
| a / Å                                              | 10.6023(3)                                                                   | 7.6295(2)                                                                    |
| b / Å                                              | 8.1642(2)                                                                    | 8.7769(5)                                                                    |
| c / Å                                              | 35.1366(12)                                                                  | 11.3046(6)                                                                   |
| alpha / °                                          | 90                                                                           | 101.353(2)                                                                   |
| beta / °                                           | 90                                                                           | 92.999(3)                                                                    |
| gamma / °                                          | 90                                                                           | 97.446(3)                                                                    |
| Unit-cell volume / Å <sup>3</sup>                  | 3041.40(15)                                                                  | 733.56(6)                                                                    |
| Z                                                  | 8                                                                            | 2                                                                            |
| Calc. density / g cm <sup>-3</sup>                 | 1.434                                                                        | 1.505                                                                        |
| F(000)                                             | 1376                                                                         | 348                                                                          |
| Radiation type                                     | MoKα                                                                         | MoKα                                                                         |
| Absorption coefficient / mm <sup>-1</sup>          | 0.365                                                                        | 0.383                                                                        |
| Crystal size / mm <sup>3</sup>                     | 0.10 x 0.10 x 0.10                                                           | 0.35 x 0.30 x 0.20                                                           |
| 2-Theta range / °                                  | 6.02-50.05                                                                   | 6.29-46.55                                                                   |
| Completeness to max 2-theta                        | 0.901                                                                        | 0.992                                                                        |
| No. of reflections measured                        | 6860                                                                         | 9430                                                                         |
| No. of independent reflections                     | 2417                                                                         | 2107                                                                         |
| R <sub>int</sub>                                   | 0.0513                                                                       | 0.0468                                                                       |
| No. parameters / restraints                        | 210 / 3                                                                      | 230 / 0                                                                      |
| Final R1 values (I > 2σ(I))                        | 0.0444                                                                       | 0.0270                                                                       |
| Final wR(F <sup>2</sup> ) values (all data)        | 0.1109                                                                       | 0.0706                                                                       |
| Goodness-of-fit on F <sup>2</sup>                  | 1.031                                                                        | 1.064                                                                        |
| Largest difference peak & hole / e Å <sup>-3</sup> | 0.308, -0.340                                                                | 0.252, -0.338                                                                |
| Flack parameter                                    | —                                                                            | —                                                                            |

### S3. Geometrical parameters of hydrogen bonds between SLFZ molecules

=====

**1p**

=====

10.5340 12.9360 17.1910 90.000 107.770 90.000 V = 2230.81

Space group: P 21/c

Symmetry operators read from CIF:

[1] x,y,z  
[2] -x,y+0.50,-z+0.50  
[3] -x,-y,-z  
[4] x,-y+0.50,z+0.50

Z(prime) = 2

Molecule 01 = C9 H9 N3 O2 S2

Centroid = 0.7561 0.7992 0.3688

Molecule 02 = C9 H9 N3 O2 S2

Centroid = 0.8066 0.2131 0.0481

INTERMOLECULAR HYDROGEN BONDS

-----

| D---H...A | ARU1 | ARU2 | D-H | H...A | D...A | D-H...A |
|-----------|------|------|-----|-------|-------|---------|
|-----------|------|------|-----|-------|-------|---------|

-----

|                 |                          |      |      |       |       |
|-----------------|--------------------------|------|------|-------|-------|
| N11---H10...O11 | [1_555_01 ---> 2_645_01] | 1.03 | 1.92 | 2.917 | 161.3 |
| N11---H11...O12 | [1_555_01 ---> 4_564_01] | 1.02 | 2.12 | 2.930 | 133.9 |
| N13---H17...O11 | [1_555_01 ---> 3_776_01] | 1.06 | 2.60 | 3.277 | 121.5 |
| N13---H17...N12 | [1_555_01 ---> 3_776_01] | 1.06 | 1.77 | 2.819 | 172.0 |
| N21---H20...N11 | [1_555_02 ---> 1_555_01] | 1.03 | 2.09 | 3.116 | 176.0 |
| N21---H21...O21 | [1_555_02 ---> 2_755_02] | 1.02 | 2.16 | 3.043 | 142.9 |
| N23---H27...N22 | [1_555_02 ---> 3_755_02] | 1.06 | 1.75 | 2.808 | 173.7 |

=====

**2p**

=====

10.3990 15.1320 14.2800 90.000 91.210 90.000 V = 2246.57

Space group: P 21/n

Symmetry operators read from CIF:

[1] x,y,z  
[2] -x+0.50,y+0.50,-z+0.50  
[3] -x,-y,-z  
[4] x+0.50,-y+0.50,z+0.50

Z(prime) = 2

Molecule 01 = C9 H9 N3 O2 S2

Centroid = 0.7461 0.4793 0.6110

Molecule 02 = C9 H9 N3 O2 S2

Centroid = 0.2234 0.4496 0.8943

INTERMOLECULAR HYDROGEN BONDS

-----

| D---H...A | ARU1 | ARU2 | D-H | H...A | D...A | D-H...A |
|-----------|------|------|-----|-------|-------|---------|
|-----------|------|------|-----|-------|-------|---------|

-----

|                 |                          |      |      |       |       |
|-----------------|--------------------------|------|------|-------|-------|
| N11---H10...O22 | [1_555_01 ---> 2_646_02] | 1.03 | 1.98 | 2.987 | 166.5 |
| N11---H11...O11 | [1_555_01 ---> 2_646_01] | 1.03 | 2.49 | 3.242 | 129.3 |
| N11---H11...N12 | [1_555_01 ---> 2_646_01] | 1.03 | 1.95 | 2.954 | 165.4 |
| N13---H17...O21 | [1_555_01 ---> 1_555_02] | 1.04 | 1.82 | 2.853 | 171.2 |
| N21---H20...O12 | [1_555_02 ---> 2_646_01] | 1.03 | 2.04 | 3.011 | 156.8 |
| N21---H21...O21 | [1_555_02 ---> 2_546_02] | 1.03 | 2.08 | 3.028 | 152.6 |
| N21---H21...N22 | [1_555_02 ---> 2_546_02] | 1.03 | 2.48 | 3.335 | 140.6 |
| N23---H27...O11 | [1_555_02 ---> 1_455_01] | 1.05 | 1.74 | 2.780 | 174.3 |

=====

**3p**

=====

17.4480 8.4980 15.5110 90.000 112.810 90.000 V = 2120.00

Space group: P 21/c

Symmetry operators read from CIF:

[1] x,y,z  
[2] -x,y+0.50,-z+0.50  
[3] -x,-y,-z  
[4] x,-y+0.50,z+0.50

Z(prime) = 2

Molecule 01 = C9 H9 N3 O2 S2

Centroid = 0.7272 0.2737 0.9869

Molecule 02 = C9 H9 N3 O2 S2

Centroid = 0.7807 0.7848 0.7766

INTERMOLECULAR HYDROGEN BONDS

-----

| D---H...A | ARU1 | ARU2 | D-H | H...A | D...A | D-H...A |
|-----------|------|------|-----|-------|-------|---------|
|-----------|------|------|-----|-------|-------|---------|

-----

|                 |                          |      |      |       |       |
|-----------------|--------------------------|------|------|-------|-------|
| N11---H10...N22 | [1_555_01 ---> 3_767_02] | 1.03 | 2.18 | 3.159 | 156.8 |
| N11---H11...O21 | [1_555_01 ---> 1_555_02] | 1.04 | 1.95 | 2.955 | 162.7 |
| N13---H17...N21 | [1_555_01 ---> 1_555_02] | 1.07 | 1.75 | 2.804 | 166.7 |
| N21---H20...O11 | [1_555_02 ---> 2_656_01] | 1.03 | 1.96 | 2.972 | 166.4 |
| N21---H21...O11 | [1_555_02 ---> 1_565_01] | 1.03 | 1.98 | 2.942 | 154.2 |
| N23---H27...N11 | [1_555_02 ---> 1_565_01] | 1.06 | 1.84 | 2.874 | 164.5 |

### S3. Geometrical parameters of hydrogen bonds between SLFZ molecules

4p

8.1930 8.5380 15.4370 90.000 94.010 90.000 V = 1077.20

Space group: P 21/c

Symmetry operators read from CIF:

[1] x,y,z  
[2] -x,y+0.50,-z+0.50  
[3] -x,-y,-z  
[4] x,-y+0.50,z+0.50

Z(prime) = 1

Molecule 01 = C9 H9 N3 O2 S2

Centroid = 0.0515 0.7261 0.3686

#### INTERMOLECULAR HYDROGEN BONDS

| D---H...A                                | ARU1 | ARU2 | D-H   | H...A | D...A | D-H...A |
|------------------------------------------|------|------|-------|-------|-------|---------|
| N11---H10...O11 [1_555_01 ---> 1_455_01] | 1.03 | 1.94 | 2.954 | 165.6 |       |         |
| N11---H11...O11 [1_555_01 ---> 2_545_01] | 1.03 | 1.99 | 2.967 | 155.6 |       |         |
| N13---H17...N11 [1_555_01 ---> 2_545_01] | 1.07 | 1.78 | 2.826 | 166.0 |       |         |

5p

10.7740 8.4670 11.3670 90.000 91.650 90.000 V = 1036.51

Space group: P 21/n

Symmetry operators read from CIF:

[1] x,y,z  
[2] -x+0.50,y+0.50,-z+0.50  
[3] -x,-y,-z  
[4] x+0.50,-y+0.50,z+0.50

Z(prime) = 1

Molecule 01 = C9 H9 N3 O2 S2

Centroid = 0.3948 0.7109 0.8431

#### INTERMOLECULAR HYDROGEN BONDS

| D---H...A                                | ARU1 | ARU2 | D-H   | H...A | D...A | D-H...A |
|------------------------------------------|------|------|-------|-------|-------|---------|
| N11---H10...N12 [1_555_01 ---> 4_465_01] | 1.03 | 2.15 | 3.129 | 156.1 |       |         |

|                                          |      |      |       |       |  |  |
|------------------------------------------|------|------|-------|-------|--|--|
| N11---H11...O11 [1_555_01 ---> 2_546_01] | 1.04 | 1.97 | 2.955 | 158.0 |  |  |
| N11---H11...O11 [1_555_01 ---> 4_465_01] | 1.04 | 2.69 | 3.147 | 106.7 |  |  |
| N13---H17...N11 [1_555_01 ---> 2_546_01] | 1.06 | 1.84 | 2.869 | 164.9 |  |  |

1\_SLFZ

8.0510 11.4920 15.5520 77.450 88.640 88.640 V = 1403.87

Space group: P-1

Symmetry operators read from CIF:

[1] x,y,z  
[2] -x,-y,-z

Z(prime) = 2

Molecule 01 = C9 H9 N3 O2 S2

Centroid = 0.4052 0.2079 0.8001

Molecule 02 = C9 H9 N3 O2 S2

Centroid = 0.4312 0.7538 0.5957

#### INTERMOLECULAR HYDROGEN BONDS

| D---H...A                                | ARU1 | ARU2 | D-H   | H...A | D...A | D-H...A |
|------------------------------------------|------|------|-------|-------|-------|---------|
| N11---H10...O21 [1_555_01 ---> 2_566_02] | 1.03 | 2.55 | 2.954 | 102.5 |       |         |
| N11---H10...O21 [1_555_01 ---> 1_555_02] | 1.03 | 1.93 | 2.923 | 160.7 |       |         |
| N11---H11...O21 [1_555_01 ---> 2_566_02] | 1.03 | 2.55 | 2.954 | 102.8 |       |         |
| N11---H11...N22 [1_555_01 ---> 2_566_02] | 1.03 | 2.37 | 3.279 | 147.2 |       |         |
| N13---H17...O11 [1_555_01 ---> 2_657_01] | 1.06 | 2.46 | 3.141 | 121.6 |       |         |
| N13---H17...N12 [1_555_01 ---> 2_657_01] | 1.06 | 1.76 | 2.802 | 169.1 |       |         |
| N21---H21...N11 [1_555_02 ---> 1_655_01] | 1.02 | 2.50 | 3.358 | 140.7 |       |         |
| N23---H27...O12 [1_555_02 ---> 2_666_01] | 1.04 | 1.80 | 2.835 | 176.3 |       |         |

2\_SLFZ

8.5410 12.4010 8.8360 90.000 102.960 90.000 V = 912.04

Space group: P21

Symmetry operators read from CIF:

[1] x,y,z  
[2] -x,y+0.50,-z

Z(prime) = 1

### S3. Geometrical parameters of hydrogen bonds between SLFZ molecules

Molecule 01 = C9 H9 N3 O2 S2  
Centroid = 0.6852 0.1458 0.6981

#### INTERMOLECULAR HYDROGEN BONDS

| D---H...A       | ARU1                     | ARU2 | D-H  | H...A | D...A | D-H...A |
|-----------------|--------------------------|------|------|-------|-------|---------|
| N11---H10...N12 | [1_555_01 ---> 1_455_01] |      | 1.03 | 2.02  | 3.047 | 175.2   |
| N11---H11...O12 | [1_555_01 ---> 2_646_01] |      | 1.03 | 1.98  | 3.001 | 170.0   |

#### 3\_SLFZ

8.4090 16.6400 11.2740 90.000 101.370 90.000 V = 1546.56

Space group: Pc

Symmetry operators read from CIF:

[1] x,y,z  
[2] x,-y,z+0.50

Z(prime) = 2

Molecule 01 = C9 H9 N3 O2 S2

Centroid = 0.5346 0.3843 0.4393

Molecule 02 = C9 H9 N3 O2 S2

Centroid = 0.4795 0.1493 0.8057

#### INTERMOLECULAR HYDROGEN BONDS

| D---H...A       | ARU1                     | ARU2 | D-H  | H...A | D...A | D-H...A |
|-----------------|--------------------------|------|------|-------|-------|---------|
| N11---H10...O11 | [1_555_01 ---> 1_655_01] |      | 1.02 | 1.97  | 2.954 | 160.2   |
| N11---H11...O12 | [1_555_01 ---> 2_665_01] |      | 1.02 | 2.46  | 2.975 | 110.2   |
| N13---H17...N22 | [1_555_01 ---> 1_555_02] |      | 1.06 | 1.76  | 2.819 | 174.8   |
| N21---H20...O21 | [1_555_02 ---> 2_655_02] |      | 1.02 | 2.66  | 3.064 | 103.6   |
| N21---H21...O21 | [1_555_02 ---> 2_655_02] |      | 1.02 | 2.68  | 3.064 | 102.4   |
| N21---H21...O22 | [1_555_02 ---> 1_655_02] |      | 1.02 | 2.16  | 3.121 | 156.2   |
| N23---H27...N12 | [1_555_02 ---> 1_555_01] |      | 1.06 | 1.75  | 2.810 | 175.9   |

#### 4\_SLFZ

16.6160 16.0880 12.6300 90.000 110.690 90.000 V = 3158.48

Space group: Cc

Symmetry operators read from CIF:

[1] x,y,z  
[2] x,-y,z+0.50  
[3] x+0.50,y+0.50,z  
[4] x+0.50,-y+0.50,z+0.50

Z(prime) = 2

Molecule 01 = C9 H9 N3 O2 S2

Centroid = 0.6061 0.8578 0.7320

Molecule 02 = C9 H9 N3 O2 S2

Centroid = 0.6024 0.6359 0.2832

#### INTERMOLECULAR HYDROGEN BONDS

| D---H...A       | ARU1                     | ARU2 | D-H  | H...A | D...A | D-H...A |
|-----------------|--------------------------|------|------|-------|-------|---------|
| N11---H10...O22 | [1_555_01 ---> 4_465_02] |      | 1.02 | 2.03  | 3.021 | 160.7   |
| N11---H11...O21 | [1_555_01 ---> 3_455_02] |      | 1.03 | 1.91  | 2.923 | 167.6   |
| N13---H17...N22 | [1_555_01 ---> 1_555_02] |      | 1.06 | 1.76  | 2.823 | 175.1   |
| N21---H20...O12 | [1_555_02 ---> 3_444_01] |      | 1.02 | 2.32  | 3.152 | 138.0   |
| N21---H21...O11 | [1_555_02 ---> 4_464_01] |      | 1.03 | 1.97  | 3.001 | 179.0   |
| N23---H27...N12 | [1_555_02 ---> 1_555_01] |      | 1.06 | 1.72  | 2.779 | 175.5   |

#### 5\_SLFZ

8.3220 16.0200 11.3520 90.000 100.290 90.000 V = 1489.09

Space group: P21/c

Symmetry operators read from CIF:

[1] x,y,z  
[2] -x,y+0.50,-z+0.50  
[3] -x,-y,-z  
[4] x,-y+0.50,z+0.50

Z(prime) = 1

Molecule 01 = C9 H9 N3 O2 S2

Centroid = 0.2042 0.6423 0.0863

#### INTERMOLECULAR HYDROGEN BONDS

| D---H...A       | ARU1                     | ARU2 | D-H  | H...A | D...A | D-H...A |
|-----------------|--------------------------|------|------|-------|-------|---------|
| N11---H10...O11 | [1_555_01 ---> 1_455_01] |      | 1.02 | 2.04  | 2.998 | 155.6   |
| N13---H17...N12 | [1_555_01 ---> 3_665_01] |      | 1.06 | 1.77  | 2.823 | 171.5   |

### S3. Geometrical parameters of hydrogen bonds between SLFZ molecules

#### 6\_SLFZ

8.4160 17.3940 10.3420 90.000 104.700 90.000 V = 1464.39

Space group: P21/c

Symmetry operators read from CIF:

- [1] x,y,z
- [2] -x,y+0.50,-z+0.50
- [3] -x,-y,-z
- [4] x,-y+0.50,z+0.50

Z(prime) = 1

Molecule 01 = C9 H9 N3 O2 S2

Centroid = 0.1854 0.3984 0.2771

#### INTERMOLECULAR HYDROGEN BONDS

| D---H...A       | ARU1                     | ARU2 | D-H  | H...A | D...A | D-H...A |
|-----------------|--------------------------|------|------|-------|-------|---------|
| N11---H10...O12 | [1_555_01 ---> 4_655_01] | 1.02 | 2.41 | 3.359 | 153.3 |         |
| N11---H11...O11 | [1_555_01 ---> 4_655_01] | 1.02 | 2.47 | 2.988 | 110.4 |         |
| N11---H11...O12 | [1_555_01 ---> 1_655_01] | 1.02 | 2.41 | 3.362 | 154.2 |         |
| N13---H17...O11 | [1_555_01 ---> 3_565_01] | 1.06 | 2.53 | 3.234 | 123.1 |         |
| N13---H17...N12 | [1_555_01 ---> 3_565_01] | 1.06 | 1.79 | 2.838 | 170.6 |         |

#### 7\_SLFZ

8.6360 19.1870 9.3540 90.000 91.030 90.000 V = 1549.70

Space group: P21/c

Symmetry operators read from CIF:

- [1] x,y,z
- [2] -x,y+0.50,-z+0.50
- [3] -x,-y,-z
- [4] x,-y+0.50,z+0.50

Z(prime) = 1

Molecule 01 = C9 H9 N3 O2 S2

Centroid = 0.8685 0.8273 0.4721

#### INTERMOLECULAR HYDROGEN BONDS

| D---H...A       | ARU1                     | ARU2 | D-H  | H...A | D...A | D-H...A |
|-----------------|--------------------------|------|------|-------|-------|---------|
| N11---H11...O12 | [1_555_01 ---> 1_455_01] | 1.02 | 2.05 | 3.066 | 169.4 |         |
| N13---H17...N12 | [1_555_01 ---> 3_776_01] | 1.06 | 1.73 | 2.791 | 173.4 |         |

#### 8\_SLFZ

8.3920 21.2070 9.3020 90.000 93.120 90.000 V = 1653.02

Space group: P21/n

Symmetry operators read from CIF:

- [1] x,y,z
- [2] -x+0.50,y+0.50,-z+0.50
- [3] -x,-y,-z
- [4] x+0.50,-y+0.50,z+0.50

Z(prime) = 1

Molecule 01 = C9 H9 N3 O2 S2

Centroid = 0.3361 0.1604 0.5456

#### INTERMOLECULAR HYDROGEN BONDS

| D---H...A       | ARU1                     | ARU2 | D-H  | H...A | D...A | D-H...A |
|-----------------|--------------------------|------|------|-------|-------|---------|
| N11---H10...O11 | [1_555_01 ---> 4_455_01] | 1.03 | 2.02 | 3.007 | 161.1 |         |
| N11---H11...O12 | [1_555_01 ---> 1_455_01] | 1.02 | 2.00 | 2.982 | 159.5 |         |
| N13---H17...N12 | [1_555_01 ---> 3_656_01] | 1.06 | 1.74 | 2.795 | 175.1 |         |

#### 9\_SLFZ

11.4480 14.2240 15.3230 90.000 111.600 90.000 V = 2319.92

Space group: P21/n

Symmetry operators read from CIF:

- [1] x,y,z
- [2] -x+0.50,y+0.50,-z+0.50
- [3] -x,-y,-z
- [4] x+0.50,-y+0.50,z+0.50

Z(prime) = 1

Molecule 01 = C9 H9 N3 O2 S2

### S3. Geometrical parameters of hydrogen bonds between SLFZ molecules

Centroid = 0.6526 0.6524 0.8792

#### INTERMOLECULAR HYDROGEN BONDS

```
-----  
D---H...A   ARU1   ARU2   D-H   H...A D...A D-H...A  
-----  
N11---H10...O12 [1_555_01 ---> 2_656_01] 1.03 1.94 2.957 171.3  
N13---H17...N12 [1_555_01 ---> 3_667_01] 1.06 1.74 2.793 173.1  
-----
```

#### 10\_SLFZ

6.0360 21.0200 12.7910 90.000 94.440 90.000 V = 1618.01

Space group: P21/n

Symmetry operators read from CIF:

```
[1] x,y,z  
[2] -x+0.50,y+0.50,-z+0.50  
[3] -x,-y,-z  
[4] x+0.50,-y+0.50,z+0.50
```

Z(prime) = 1

Molecule 01 = C9 H9 N3 O2 S2

Centroid = 0.1213 0.3553 0.1873

#### INTERMOLECULAR HYDROGEN BONDS

```
-----  
D---H...A   ARU1   ARU2   D-H   H...A D...A D-H...A  
-----  
N11---H10...O11 [1_555_01 ---> 4_455_01] 1.03 2.00 3.007 166.9  
N11---H10...N12 [1_555_01 ---> 4_455_01] 1.03 2.58 3.339 130.0  
N11---H11...O11 [1_555_01 ---> 4_555_01] 1.02 2.48 3.248 131.6  
N11---H11...O12 [1_555_01 ---> 4_555_01] 1.02 2.53 3.394 142.1  
N13---H17...O12 [1_555_01 ---> 1_655_01] 1.04 1.79 2.816 168.3  
-----
```

#### 11\_SLFZ

8.3660 21.3530 9.0970 90.000 93.370 90.000 V = 1622.27

Space group: P21/n

Symmetry operators read from CIF:

```
[1] x,y,z  
[2] -x+0.50,y+0.50,-z+0.50
```

[3] -x,-y,-z

[4] x+0.50,-y+0.50,z+0.50

Z(prime) = 1

Molecule 01 = C9 H9 N3 O2 S2

Centroid = 0.3702 0.1571 0.5487

#### INTERMOLECULAR HYDROGEN BONDS

```
-----  
D---H...A   ARU1   ARU2   D-H   H...A D...A D-H...A  
-----  
N11---H10...O11 [1_555_01 ---> 4_455_01] 1.03 2.04 3.030 161.7  
N11---H11...O12 [1_555_01 ---> 1_455_01] 1.02 2.04 2.995 155.0  
N13---H17...O11 [1_555_01 ---> 3_656_01] 1.06 2.66 3.347 121.9  
N13---H17...N12 [1_555_01 ---> 3_656_01] 1.06 1.75 2.811 175.2  
-----
```

#### 12\_SLFZ

8.1940 21.1110 9.5700 90.000 94.200 90.000 V = 1651.01

Space group: P21/n

Symmetry operators read from CIF:

```
[1] x,y,z  
[2] -x+0.50,y+0.50,-z+0.50  
[3] -x,-y,-z  
[4] x+0.50,-y+0.50,z+0.50
```

Z(prime) = 1

Molecule 01 = C9 H9 N3 O2 S2

Centroid = 0.3876 0.1590 0.5641

#### INTERMOLECULAR HYDROGEN BONDS

```
-----  
D---H...A   ARU1   ARU2   D-H   H...A D...A D-H...A  
-----  
N11---H10...O11 [1_555_01 ---> 4_455_01] 1.03 1.96 2.954 161.1  
N11---H11...O12 [1_555_01 ---> 1_455_01] 1.02 2.08 3.008 150.3  
N13---H17...O11 [1_555_01 ---> 3_656_01] 1.06 2.62 3.306 122.3  
N13---H17...N12 [1_555_01 ---> 3_656_01] 1.06 1.77 2.826 173.7  
-----
```



### S3. Geometrical parameters of hydrogen bonds between SLFZ molecules

#### 13\_SLFZ

8.6280 21.1510 9.1350 90.000 97.700 90.000 V = 1652.02

Space group: P21/n

Symmetry operators read from CIF:

[1] x,y,z

[2] -x+0.50,y+0.50,-z+0.50

[3] -x,-y,-z

[4] x+0.50,-y+0.50,z+0.50

Z(prime) = 1

Molecule 01 = C9 H9 N3 O2 S2

Centroid = 0.3634 0.1550 0.5687

#### INTERMOLECULAR HYDROGEN BONDS

D---H...A ARU1 ARU2 D-H H...A D...A D-H...A

N11---H10...O11 [1\_555\_01 ---> 4\_455\_01] 1.03 1.94 2.949 167.2

N11---H11...O12 [1\_555\_01 ---> 1\_455\_01] 1.02 1.96 2.963 166.5

N13---H17...O11 [1\_555\_01 ---> 3\_656\_01] 1.06 2.60 3.295 122.5

N13---H17...N12 [1\_555\_01 ---> 3\_656\_01] 1.06 1.76 2.818 173.2

#### 14\_SLFZ

8.6060 21.6430 8.7350 90.000 98.760 90.000 V = 1608.00

Space group: P21/n

Symmetry operators read from CIF:

[1] x,y,z

[2] -x+0.50,y+0.50,-z+0.50

[3] -x,-y,-z

[4] x+0.50,-y+0.50,z+0.50

Z(prime) = 1

Molecule 01 = C9 H9 N3 O2 S2

Centroid = 0.3255 0.1523 0.5762

#### INTERMOLECULAR HYDROGEN BONDS

D---H...A ARU1 ARU2 D-H H...A D...A D-H...A

N11---H10...O11 [1\_555\_01 ---> 4\_455\_01] 1.03 1.93 2.948 170.3

N11---H11...O12 [1\_555\_01 ---> 1\_455\_01] 1.02 1.92 2.934 168.9

N13---H17...O11 [1\_555\_01 ---> 3\_656\_01] 1.06 2.60 3.288 121.7

N13---H17...N12 [1\_555\_01 ---> 3\_656\_01] 1.06 1.75 2.803 174.0

#### 15\_SLFZ

8.5500 21.4910 9.2150 90.000 90.270 90.000 V = 1693.22

Space group: P21/n

Symmetry operators read from CIF:

[1] x,y,z

[2] -x+0.50,y+0.50,-z+0.50

[3] -x,-y,-z

[4] x+0.50,-y+0.50,z+0.50

Z(prime) = 1

Molecule 01 = C9 H9 N3 O2 S2

Centroid = 0.3184 0.8438 0.4569

#### INTERMOLECULAR HYDROGEN BONDS

D---H...A ARU1 ARU2 D-H H...A D...A D-H...A

N11---H10...O11 [1\_555\_01 ---> 4\_464\_01] 1.02 2.31 3.270 155.2

N11---H11...O12 [1\_555\_01 ---> 1\_455\_01] 1.02 1.99 2.988 165.3

N13---H17...N12 [1\_555\_01 ---> 3\_676\_01] 1.06 1.73 2.795 175.3

#### 16\_SLFZ

6.4870 12.3320 22.2590 90.000 94.190 90.000 V = 1775.91

Space group: P21/n

Symmetry operators read from CIF:

[1] x,y,z

[2] -x+0.50,y+0.50,-z+0.50

[3] -x,-y,-z

[4] x+0.50,-y+0.50,z+0.50

Z(prime) = 1

Molecule 01 = C9 H9 N3 O2 S2

Centroid = 0.3855 0.6541 0.1344

### S3. Geometrical parameters of hydrogen bonds between SLFZ molecules

#### INTERMOLECULAR HYDROGEN BONDS

```
-----  
D---H...A   ARU1   ARU2   D-H   H...A D...A D-H...A  
-----  
N11---H10...O12 [1_555_01 ---> 2_555_01] 1.03 1.91 2.936 173.0  
N11---H11...O11 [1_555_01 ---> 2_655_01] 1.02 2.06 2.977 147.3  
N13---H17...N12 [1_555_01 ---> 3_665_01] 1.06 1.78 2.835 173.2  
-----
```

#### 17\_SLFZ

```
=====
```

6.6130 12.0740 22.0850 90.000 93.440 90.000 V = 1760.21

Space group: P21/n

Symmetry operators read from CIF:

```
[1] x,y,z  
[2] -x+0.50,y+0.50,-z+0.50  
[3] -x,-y,-z  
[4] x+0.50,-y+0.50,z+0.50
```

Z(prime) = 1

Molecule 01 = C9 H9 N3 O2 S2

Centroid = 0.3876 0.6550 0.1362

#### INTERMOLECULAR HYDROGEN BONDS

```
-----  
D---H...A   ARU1   ARU2   D-H   H...A D...A D-H...A  
-----  
N11---H10...O12 [1_555_01 ---> 2_555_01] 1.03 1.88 2.903 173.6  
N11---H11...O11 [1_555_01 ---> 2_655_01] 1.02 2.01 2.943 149.4  
N13---H17...N12 [1_555_01 ---> 3_665_01] 1.06 1.76 2.814 173.0  
-----
```

#### 18\_SLFZ

```
=====
```

8.4170 20.9750 9.4720 90.000 93.830 90.000 V = 1668.51

Space group: P21/n

Symmetry operators read from CIF:

```
[1] x,y,z  
[2] -x+0.50,y+0.50,-z+0.50  
[3] -x,-y,-z  
[4] x+0.50,-y+0.50,z+0.50
```

Z(prime) = 1

Molecule 01 = C9 H9 N3 O2 S2

Centroid = 0.3874 0.1587 0.5516

#### INTERMOLECULAR HYDROGEN BONDS

```
-----  
D---H...A   ARU1   ARU2   D-H   H...A D...A D-H...A  
-----  
N11---H10...O11 [1_555_01 ---> 4_455_01] 1.03 1.99 2.981 162.2  
N11---H11...O12 [1_555_01 ---> 1_455_01] 1.02 2.10 3.063 156.2  
N13---H17...O11 [1_555_01 ---> 3_656_01] 1.06 2.66 3.344 122.0  
N13---H17...N12 [1_555_01 ---> 3_656_01] 1.06 1.75 2.808 173.7  
-----
```

#### 19\_SLFZ

```
=====
```

6.5720 12.9590 21.5330 90.000 92.480 90.000 V = 1832.17

Space group: P21/n

Symmetry operators read from CIF:

```
[1] x,y,z  
[2] -x+0.50,y+0.50,-z+0.50  
[3] -x,-y,-z  
[4] x+0.50,-y+0.50,z+0.50
```

Z(prime) = 1

Molecule 01 = C9 H9 N3 O2 S2

Centroid = 0.3867 0.6251 0.1453

#### INTERMOLECULAR HYDROGEN BONDS

```
-----  
D---H...A   ARU1   ARU2   D-H   H...A D...A D-H...A  
-----  
N11---H10...O12 [1_555_01 ---> 2_555_01] 1.03 1.86 2.882 171.3  
N11---H11...O11 [1_555_01 ---> 2_655_01] 1.02 2.04 2.958 147.7  
N13---H17...N12 [1_555_01 ---> 3_665_01] 1.06 1.72 2.787 176.7  
-----
```

#### 20\_SLFZ

```
=====
```

8.7830 14.7280 23.8000 90.000 98.460 90.000 V = 3045.17

Space group: P21/n

### S3. Geometrical parameters of hydrogen bonds between SLFZ molecules

Symmetry operators read from CIF:

[1] x,y,z  
[2] -x+0.50,y+0.50,-z+0.50  
[3] -x,-y,-z  
[4] x+0.50,-y+0.50,z+0.50

Z(prime) = 2

Molecule 01 = C9 H9 N3 O2 S2

Centroid = 0.1197 0.6038 0.8759

Molecule 02 = C9 H9 N3 O2 S2

Centroid = 0.5747 0.5141 0.6190

INTERMOLECULAR HYDROGEN BONDS

| D---H...A       | ARU1                     | ARU2 | D-H  | H...A | D...A | D-H...A |
|-----------------|--------------------------|------|------|-------|-------|---------|
| N11---H10...O21 | [1_555_01 ---> 1_555_02] |      | 1.03 | 1.92  | 2.932 | 165.3   |
| N11---H11...O12 | [1_555_01 ---> 1_655_01] |      | 1.03 | 1.87  | 2.898 | 173.8   |
| N13---H17...O11 | [1_555_01 ---> 3_567_01] |      | 1.06 | 2.59  | 3.284 | 122.4   |
| N13---H17...N12 | [1_555_01 ---> 3_567_01] |      | 1.06 | 1.77  | 2.825 | 172.6   |
| N21---H20...N11 | [1_555_02 ---> 2_646_01] |      | 1.03 | 2.01  | 3.038 | 173.9   |
| N21---H21...O22 | [1_555_02 ---> 1_655_02] |      | 1.03 | 2.02  | 3.044 | 176.0   |
| N23---H27...O11 | [1_555_02 ---> 4_564_01] |      | 1.04 | 1.79  | 2.831 | 174.5   |

=====  
**21\_SLFZ**  
=====

8.4540 20.6990 9.4870 90.000 92.370 90.000 V = 1658.70

Space group: P21/n

Symmetry operators read from CIF:

[1] x,y,z  
[2] -x+0.50,y+0.50,-z+0.50  
[3] -x,-y,-z  
[4] x+0.50,-y+0.50,z+0.50

Z(prime) = 1

Molecule 01 = C9 H9 N3 O2 S2

Centroid = 0.3882 0.1596 0.5423

INTERMOLECULAR HYDROGEN BONDS

| D---H...A       | ARU1                     | ARU2 | D-H  | H...A | D...A | D-H...A |
|-----------------|--------------------------|------|------|-------|-------|---------|
| N11---H10...O11 | [1_555_01 ---> 4_455_01] |      | 1.03 | 2.05  | 3.034 | 159.7   |

N11---H11...O12 [1\_555\_01 ---> 1\_455\_01] 1.02 2.08 3.045 156.4

N13---H17...O11 [1\_555\_01 ---> 3\_656\_01] 1.06 2.67 3.363 122.6

N13---H17...N12 [1\_555\_01 ---> 3\_656\_01] 1.06 1.76 2.814 173.9

=====  
**22\_SLFZ**  
=====

8.5830 20.6520 9.5200 90.000 93.660 90.000 V = 1684.04

Space group: P21/n

Symmetry operators read from CIF:

[1] x,y,z  
[2] -x+0.50,y+0.50,-z+0.50  
[3] -x,-y,-z  
[4] x+0.50,-y+0.50,z+0.50

Z(prime) = 1

Molecule 01 = C9 H9 N3 O2 S2

Centroid = 0.3537 0.1597 0.5549

INTERMOLECULAR HYDROGEN BONDS

| D---H...A       | ARU1                     | ARU2 | D-H  | H...A | D...A | D-H...A |
|-----------------|--------------------------|------|------|-------|-------|---------|
| N11---H10...O11 | [1_555_01 ---> 4_455_01] |      | 1.03 | 1.99  | 2.979 | 160.2   |
| N11---H11...O12 | [1_555_01 ---> 1_455_01] |      | 1.02 | 1.99  | 2.993 | 164.9   |
| N13---H17...O11 | [1_555_01 ---> 3_656_01] |      | 1.06 | 2.60  | 3.278 | 120.9   |
| N13---H17...N12 | [1_555_01 ---> 3_656_01] |      | 1.06 | 1.74  | 2.794 | 173.8   |

=====  
**23\_SLFZ**  
=====

16.5330 9.9960 19.8100 90.000 112.260 90.000 V = 3029.89

Space group: P21/n

Symmetry operators read from CIF:

[1] x,y,z  
[2] -x+0.50,y+0.50,-z+0.50  
[3] -x,-y,-z  
[4] x+0.50,-y+0.50,z+0.50

Z(prime) = 2

Molecule 01 = C9 H9 N3 O2 S2

Centroid = 0.7981 0.1697 0.8802

### S3. Geometrical parameters of hydrogen bonds between SLFZ molecules

Molecule O2 = C9 H9 N3 O2 S2  
Centroid = 0.3898 0.3029 0.8938

#### INTERMOLECULAR HYDROGEN BONDS

| D---H...A       | ARU1                     | ARU2 | D-H  | H...A | D...A | D-H...A |
|-----------------|--------------------------|------|------|-------|-------|---------|
| N11---H10...O21 | [1_555_01 ---> 1_555_02] |      | 1.02 | 2.15  | 3.108 | 155.0   |
| N11---H11...O12 | [1_555_01 ---> 2_646_01] |      | 1.03 | 2.07  | 3.064 | 163.2   |
| N13---H17...O11 | [1_555_01 ---> 3_757_01] |      | 1.06 | 2.66  | 3.340 | 121.1   |
| N13---H17...N12 | [1_555_01 ---> 3_757_01] |      | 1.06 | 1.74  | 2.798 | 176.0   |
| N21---H20...O11 | [1_555_02 ---> 1_455_01] |      | 1.03 | 2.01  | 3.017 | 166.5   |
| N21---H21...O21 | [1_555_02 ---> 2_556_02] |      | 1.03 | 2.00  | 3.007 | 164.8   |

#### 24\_SLFZ

20.7050 11.3850 14.1360 90.000 99.020 90.000 V = 3291.02

Space group: C2/c

Symmetry operators read from CIF:

- [1] x,y,z
- [2] -x,y,-z+0.50
- [3] -x,-y,-z
- [4] x,-y,z+0.50
- [5] x+0.50,y+0.50,z
- [6] -x+0.50,y+0.50,-z+0.50
- [7] -x+0.50,-y+0.50,-z
- [8] x+0.50,-y+0.50,z+0.50

Z(prime) = 1

Molecule O1 = C9 H9 N3 O2 S2

Centroid = 0.6072 0.7331 0.4223

#### INTERMOLECULAR HYDROGEN BONDS

| D---H...A       | ARU1                     | ARU2 | D-H  | H...A | D...A | D-H...A |
|-----------------|--------------------------|------|------|-------|-------|---------|
| N11---H11...O11 | [1_555_01 ---> 4_564_01] |      | 1.02 | 2.11  | 3.058 | 152.3   |
| N13---H17...N12 | [1_555_01 ---> 3_676_01] |      | 1.06 | 1.78  | 2.838 | 175.5   |

#### 25\_SLFZ

9.5150 16.6750 19.2490 90.000 90.000 90.000 V = 3054.10

Space group: P212121

Symmetry operators read from CIF:

- [1] x,y,z
- [2] -x+0.50,-y,z+0.50
- [3] x+0.50,-y+0.50,-z
- [4] -x,y+0.50,-z+0.50

Z(prime) = 2

Molecule O1 = C9 H9 N3 O2 S2

Centroid = 0.4842 0.3850 0.3467

Molecule O2 = C9 H9 N3 O2 S2

Centroid = 0.5047 0.6287 0.6388

#### INTERMOLECULAR HYDROGEN BONDS

| D---H...A       | ARU1                     | ARU2 | D-H  | H...A | D...A | D-H...A |
|-----------------|--------------------------|------|------|-------|-------|---------|
| N11---H10...O12 | [1_555_01 ---> 4_645_01] |      | 1.03 | 1.96  | 2.935 | 158.4   |
| N11---H11...O21 | [1_555_01 ---> 3_556_02] |      | 1.02 | 2.09  | 3.032 | 152.6   |
| N13---H17...O21 | [1_555_01 ---> 1_555_02] |      | 1.06 | 2.69  | 3.371 | 121.8   |
| N13---H17...N22 | [1_555_01 ---> 1_555_02] |      | 1.06 | 1.74  | 2.797 | 172.8   |
| N21---H20...O22 | [1_555_02 ---> 4_656_02] |      | 1.02 | 2.17  | 3.025 | 139.4   |
| N21---H21...O11 | [1_555_02 ---> 3_466_01] |      | 1.03 | 2.02  | 3.043 | 171.4   |
| N23---H27...N12 | [1_555_02 ---> 1_555_01] |      | 1.06 | 1.72  | 2.784 | 174.3   |

#### 26\_SLFZ

19.6390 8.8640 24.6120 90.000 90.000 90.000 V = 4284.46

Space group: Aba2

Symmetry operators read from CIF:

- [1] x,y,z
- [2] -x,-y,z
- [3] -x+0.50,y,z+0.50
- [4] x+0.50,-y,z+0.50
- [5] x,y+0.50,z+0.50
- [6] -x,-y+0.50,z+0.50
- [7] -x+0.50,y+0.50,z
- [8] x+0.50,-y+0.50,z

Z(prime) = 1

Molecule O1 = C9 H9 N3 O2 S2

### S3. Geometrical parameters of hydrogen bonds between SLFZ molecules

Centroid = 0.1441 0.8820 0.2637

#### INTERMOLECULAR HYDROGEN BONDS

D---H...A ARU1 ARU2 D-H H...A D...A D-H...A

N13---H17...N12 [1\_555\_01 ---> 2\_575\_01] 1.07 1.69 2.758 175.9

#### 27\_SLFZ

20.4060 9.0160 20.4940 90.000 90.000 90.000 V = 3770.50

Space group: Pbc<sub>a</sub>

Symmetry operators read from CIF:

- [1] x,y,z
- [2] -x+0.50,-y,z+0.50
- [3] x+0.50,-y+0.50,-z
- [4] -x,y+0.50,-z+0.50
- [5] -x,-y,-z
- [6] x+0.50,y,-z+0.50
- [7] -x+0.50,y+0.50,z
- [8] x,-y+0.50,z+0.50

Z(prime) = 1

Molecule 01 = C9 H9 N3 O2 S2

Centroid = 0.3756 0.7021 0.4303

#### INTERMOLECULAR HYDROGEN BONDS

D---H...A ARU1 ARU2 D-H H...A D...A D-H...A

N13---H17...N12 [1\_555\_01 ---> 5\_666\_01] 1.06 1.79 2.850 175.0

#### 28\_SLFZ

8.0100 20.8200 8.9900 90.000 94.650 90.000 V = 1494.31

Space group: P21/n

Symmetry operators read from CIF:

- [1] x,y,z
- [2] -x+0.50,y+0.50,-z+0.50
- [3] -x,-y,-z

[4] x+0.50,-y+0.50,z+0.50

Z(prime) = 1

Molecule 01 = C9 H9 N3 O2 S2

Centroid = 0.4128 0.1558 0.5665

#### INTERMOLECULAR HYDROGEN BONDS

D---H...A ARU1 ARU2 D-H H...A D...A D-H...A

N11---H10...O11 [1\_555\_01 ---> 4\_455\_01] 1.03 1.96 2.938 158.1

N11---H11...O12 [1\_555\_01 ---> 1\_455\_01] 1.02 2.05 2.930 143.0

N13---H17...O11 [1\_555\_01 ---> 3\_656\_01] 1.06 2.52 3.220 123.3

N13---H17...N12 [1\_555\_01 ---> 3\_656\_01] 1.06 1.77 2.816 169.9

#### 29\_SLFZ

8.5230 21.0730 9.0870 90.000 96.540 90.000 V = 1621.45

Space group: P21/n

Symmetry operators read from CIF:

- [1] x,y,z
- [2] -x+0.50,y+0.50,-z+0.50
- [3] -x,-y,-z
- [4] x+0.50,-y+0.50,z+0.50

Z(prime) = 1

Molecule 01 = C9 H9 N3 O2 S2

Centroid = 0.3707 0.1535 0.5756

#### INTERMOLECULAR HYDROGEN BONDS

D---H...A ARU1 ARU2 D-H H...A D...A D-H...A

N11---H10...O11 [1\_555\_01 ---> 4\_455\_01] 1.03 1.94 2.936 163.6

N11---H11...O12 [1\_555\_01 ---> 1\_455\_01] 1.03 1.89 2.904 170.2

N13---H17...O11 [1\_555\_01 ---> 3\_656\_01] 1.06 2.56 3.241 121.4

N13---H17...N12 [1\_555\_01 ---> 3\_656\_01] 1.06 1.75 2.802 173.2

#### 30\_SLFZ

8.6785 19.9110 10.0217 90.000 97.776 90.000 V = 1715.80

### S3. Geometrical parameters of hydrogen bonds between SLFZ molecules

Space group: P21/n

Symmetry operators read from CIF:

- [1] x,y,z
- [2] -x+0.50,y+0.50,-z+0.50
- [3] -x,-y,-z
- [4] x+0.50,-y+0.50,z+0.50

Z(prime) = 1

Molecule 01 = C9 H9 N3 O2 S2

Centroid = 0.3704 0.1594 0.5702

INTERMOLECULAR HYDROGEN BONDS

| D---H...A       | ARU1                     | ARU2 | D-H  | H...A | D...A | D-H...A |
|-----------------|--------------------------|------|------|-------|-------|---------|
| N11---H10...O11 | [1_555_01 ---> 4_455_01] |      | 1.03 | 1.89  | 2.909 | 168.4   |
| N11---H11...O12 | [1_555_01 ---> 1_455_01] |      | 1.02 | 1.92  | 2.946 | 174.1   |
| N13---H17...O11 | [1_555_01 ---> 3_656_01] |      | 1.05 | 2.48  | 3.180 | 123.3   |
| N13---H17...N12 | [1_555_01 ---> 3_656_01] |      | 1.05 | 1.82  | 2.869 | 170.5   |

=====  
**31\_SLFZ**  
=====

8.2478 21.0191 9.0739 90.000 96.534 90.000 V = 1562.85

Space group: P21/n

Symmetry operators read from CIF:

- [1] x,y,z
- [2] -x+0.50,y+0.50,-z+0.50
- [3] -x,-y,-z
- [4] x+0.50,-y+0.50,z+0.50

Z(prime) = 1

Molecule 01 = C9 H9 N3 O2 S2

Centroid = 0.3966 0.1554 0.5637

INTERMOLECULAR HYDROGEN BONDS

| D---H...A       | ARU1                     | ARU2 | D-H  | H...A | D...A | D-H...A |
|-----------------|--------------------------|------|------|-------|-------|---------|
| N11---H10...O11 | [1_555_01 ---> 4_455_01] |      | 1.03 | 1.94  | 2.943 | 163.9   |
| N11---H11...O12 | [1_555_01 ---> 1_455_01] |      | 1.02 | 1.98  | 2.937 | 153.6   |
| N13---H17...O11 | [1_555_01 ---> 3_656_01] |      | 1.06 | 2.56  | 3.256 | 122.5   |
| N13---H17...N12 | [1_555_01 ---> 3_656_01] |      | 1.06 | 1.76  | 2.811 | 171.5   |

=====  
**32\_SLFZ**  
=====

8.4758 20.7179 9.6108 90.000 97.840 90.000 V = 1671.89

Space group: P21/n

Symmetry operators read from CIF:

- [1] x,y,z
- [2] -x+0.50,y+0.50,-z+0.50
- [3] -x,-y,-z
- [4] x+0.50,-y+0.50,z+0.50

Z(prime) = 1

Molecule 01 = C9 H9 N3 O2 S2

Centroid = 0.3469 0.1567 0.5811

INTERMOLECULAR HYDROGEN BONDS

| D---H...A       | ARU1                     | ARU2 | D-H  | H...A | D...A | D-H...A |
|-----------------|--------------------------|------|------|-------|-------|---------|
| N11---H10...O11 | [1_555_01 ---> 4_455_01] |      | 1.03 | 1.88  | 2.887 | 166.7   |
| N11---H11...O12 | [1_555_01 ---> 1_455_01] |      | 1.03 | 1.87  | 2.881 | 169.4   |
| N13---H17...O11 | [1_555_01 ---> 3_656_01] |      | 1.06 | 2.46  | 3.147 | 121.6   |
| N13---H17...N12 | [1_555_01 ---> 3_656_01] |      | 1.06 | 1.78  | 2.827 | 171.2   |

=====  
**33\_SLFZ**  
=====

9.1120 18.9940 10.5900 90.000 101.370 90.000 V = 1796.88

Space group: P21/n

Symmetry operators read from CIF:

- [1] x,y,z
- [2] -x+0.50,y+0.50,-z+0.50
- [3] -x,-y,-z
- [4] x+0.50,-y+0.50,z+0.50

Z(prime) = 1

Molecule 01 = C9 H9 N3 O2 S2

Centroid = 0.3531 0.1654 0.5476

INTERMOLECULAR HYDROGEN BONDS

### S3. Geometrical parameters of hydrogen bonds between SLFZ molecules

```
D---H...A   ARU1   ARU2   D-H   H...A D...A D-H...A
-----
N11---H10...O11 [1_555_01 ---> 4_455_01] 1.03 1.93 2.951 175.3
N11---H11...O12 [1_555_01 ---> 1_455_01] 1.02 2.06 3.069 168.2
N13---H17...N12 [1_555_01 ---> 3_656_01] 1.06 1.77 2.823 174.8
```

#### 34\_SLFZ

```
8.3551 18.8800 10.7764 90.000 96.790 90.000 V = 1687.99
```

Space group: P21/n

Symmetry operators read from CIF:

```
[1] x,y,z
[2] -x+0.50,y+0.50,-z+0.50
[3] -x,-y,-z
[4] x+0.50,-y+0.50,z+0.50
```

Z(prime) = 1

Molecule 01 = C9 H9 N3 O2 S2

Centroid = 0.3637 0.1746 0.5251

#### INTERMOLECULAR HYDROGEN BONDS

```
D---H...A   ARU1   ARU2   D-H   H...A D...A D-H...A
-----
N11---H10...O11 [1_555_01 ---> 4_455_01] 1.03 1.92 2.932 168.3
N11---H11...O12 [1_555_01 ---> 1_455_01] 1.02 1.99 2.971 159.3
N13---H17...N12 [1_555_01 ---> 3_656_01] 1.06 1.73 2.787 176.8
```

#### 35\_SLFZ

```
8.3630 21.1460 9.1160 90.000 95.760 90.000 V = 1603.97
```

Space group: P21

Symmetry operators read from CIF:

```
[1] x,y,z
[2] -x,y+0.50,-z
```

Z(prime) = 2

Molecule 01 = C9 H9 N3 O2 S2

Centroid = 0.6155 0.1559 0.8217

Molecule 02 = C9 H9 N3 O2 S2

Centroid = 0.8947 -0.1547 0.6814

#### INTERMOLECULAR HYDROGEN BONDS

```
D---H...A   ARU1   ARU2   D-H   H...A D...A D-H...A
-----
N11---H10...O21 [1_555_01 ---> 2_657_02] 1.03 1.93 2.927 164.2
N11---H11...O12 [1_555_01 ---> 1_455_01] 1.03 1.88 2.884 164.9
N13---H17...O21 [1_555_01 ---> 1_555_02] 1.06 2.53 3.203 120.8
N13---H17...N22 [1_555_01 ---> 1_555_02] 1.06 1.73 2.786 173.0
N21---H20...O11 [1_555_02 ---> 2_746_01] 1.03 1.97 2.956 161.4
N21---H21...O22 [1_555_02 ---> 1_655_02] 1.02 1.95 2.924 157.8
N23---H27...O11 [1_555_02 ---> 1_555_01] 1.06 2.53 3.207 120.8
N23---H27...N12 [1_555_02 ---> 1_555_01] 1.06 1.73 2.788 172.6
```

#### 36\_SLFZ

```
8.1540 17.3990 10.0770 90.000 101.320 90.000 V = 1401.83
```

Space group: P21/c

Symmetry operators read from CIF:

```
[1] x,y,z
[2] -x,y+0.50,-z+0.50
[3] -x,-y,-z
[4] x,-y+0.50,z+0.50
```

Z(prime) = 1

Molecule 01 = C9 H9 N3 O2 S2

Centroid = 0.6925 0.6284 0.4158

#### INTERMOLECULAR HYDROGEN BONDS

```
D---H...A   ARU1   ARU2   D-H   H...A D...A D-H...A
-----
N11---H10...O11 [1_555_01 ---> 1_455_01] 1.03 2.65 3.240 116.8
N11---H10...O12 [1_555_01 ---> 4_464_01] 1.03 2.10 3.013 146.6
N13---H17...O11 [1_555_01 ---> 3_766_01] 1.06 2.56 3.274 124.2
N13---H17...N12 [1_555_01 ---> 3_766_01] 1.06 1.77 2.815 170.5
```

#### 37\_SLFZ

```
8.3900 18.8130 9.5400 90.000 102.540 90.000 V = 1469.88
```

### S3. Geometrical parameters of hydrogen bonds between SLFZ molecules

Space group: P21/c  
Symmetry operators read from CIF:  
[1] x,y,z  
[2] -x,y+0.50,-z+0.50  
[3] -x,-y,-z  
[4] x,-y+0.50,z+0.50

Z(prime) = 1  
Molecule 01 = C9 H9 N3 O2 S2  
Centroid = 0.8280 0.8256 0.4327

#### INTERMOLECULAR HYDROGEN BONDS

| D---H...A       | ARU1                     | ARU2 | D-H  | H...A | D...A | D-H...A |
|-----------------|--------------------------|------|------|-------|-------|---------|
| N11---H11...O12 | [1_555_01 ---> 1_455_01] |      | 1.02 | 2.23  | 3.158 | 150.2   |
| N13---H17...O11 | [1_555_01 ---> 3_776_01] |      | 1.07 | 2.64  | 3.325 | 121.7   |
| N13---H17...N12 | [1_555_01 ---> 3_776_01] |      | 1.07 | 1.70  | 2.766 | 174.0   |

#### 38\_SLFZ

8.1670 12.4430 15.6320 90.000 96.880 90.000 V = 1577.12

Space group: P21/c  
Symmetry operators read from CIF:  
[1] x,y,z  
[2] -x,y+0.50,-z+0.50  
[3] -x,-y,-z  
[4] x,-y+0.50,z+0.50

Z(prime) = 1  
Molecule 01 = C9 H9 N3 O2 S2  
Centroid = 0.2645 0.4202 0.1526

#### INTERMOLECULAR HYDROGEN BONDS

| D---H...A       | ARU1                     | ARU2 | D-H  | H...A | D...A | D-H...A |
|-----------------|--------------------------|------|------|-------|-------|---------|
| N11---H10...O11 | [1_555_01 ---> 1_455_01] |      | 1.02 | 2.20  | 3.062 | 141.2   |
| N13---H17...N12 | [1_555_01 ---> 3_665_01] |      | 1.06 | 1.75  | 2.811 | 174.5   |

#### 39\_SLFZ

9.0450 16.8640 39.4210 90.000 90.000 90.000 V = 6013.08

Space group: Pbca  
Symmetry operators read from CIF:  
[1] x,y,z  
[2] -x+0.50,-y,z+0.50  
[3] x+0.50,-y+0.50,-z  
[4] -x,y+0.50,-z+0.50  
[5] -x,-y,-z  
[6] x+0.50,y,-z+0.50  
[7] -x+0.50,y+0.50,z  
[8] x,-y+0.50,z+0.50

Z(prime) = 2  
Molecule 01 = C9 H9 N3 O2 S2  
Centroid = 0.5601 0.7022 0.8035  
Molecule 02 = C9 H9 N3 O2 S2  
Centroid = 0.5580 0.6687 0.9519

#### INTERMOLECULAR HYDROGEN BONDS

| D---H...A       | ARU1                     | ARU2 | D-H  | H...A | D...A | D-H...A |
|-----------------|--------------------------|------|------|-------|-------|---------|
| N11---H10...O12 | [1_555_01 ---> 4_656_01] |      | 1.03 | 1.96  | 2.929 | 156.7   |
| N11---H11...O11 | [1_555_01 ---> 7_555_01] |      | 1.03 | 1.97  | 2.970 | 163.1   |
| N13---H17...O21 | [1_555_01 ---> 1_555_02] |      | 1.06 | 2.63  | 3.331 | 123.1   |
| N13---H17...N22 | [1_555_01 ---> 1_555_02] |      | 1.06 | 1.72  | 2.774 | 172.3   |
| N21---H20...O21 | [1_555_02 ---> 3_467_02] |      | 1.03 | 2.09  | 3.104 | 169.5   |
| N21---H21...O22 | [1_555_02 ---> 7_655_02] |      | 1.03 | 1.90  | 2.916 | 169.1   |
| N23---H27...O11 | [1_555_02 ---> 1_555_01] |      | 1.06 | 2.62  | 3.337 | 124.3   |
| N23---H27...N12 | [1_555_02 ---> 1_555_01] |      | 1.06 | 1.76  | 2.808 | 170.3   |

#### 40\_SLFZ

9.1790 16.9070 39.2020 90.000 90.000 90.000 V = 6083.73

Space group: Pbca  
Symmetry operators read from CIF:  
[1] x,y,z  
[2] -x+0.50,-y,z+0.50  
[3] x+0.50,-y+0.50,-z  
[4] -x,y+0.50,-z+0.50



### S3. Geometrical parameters of hydrogen bonds between SLFZ molecules

[5] -x,-y,-z  
[6] x+0.50,y,-z+0.50  
[7] -x+0.50,y+0.50,z  
[8] x,-y+0.50,z+0.50

Z(prime) = 2  
Molecule 01 = C9 H9 N3 O2 S2  
Centroid = 0.5556 0.7023 0.8025  
Molecule 02 = C9 H9 N3 O2 S2  
Centroid = 0.5708 0.6715 0.9516

#### INTERMOLECULAR HYDROGEN BONDS

| D---H...A       | ARU1                     | ARU2 | D-H  | H...A | D...A | D-H...A |
|-----------------|--------------------------|------|------|-------|-------|---------|
| N11---H10...O12 | [1_555_01 ---> 4_656_01] |      | 1.03 | 2.01  | 2.986 | 158.9   |
| N11---H11...O11 | [1_555_01 ---> 7_555_01] |      | 1.03 | 2.02  | 3.019 | 163.0   |
| N13---H17...N22 | [1_555_01 ---> 1_555_02] |      | 1.06 | 1.73  | 2.788 | 172.5   |
| N21---H20...O21 | [1_555_02 ---> 3_467_02] |      | 1.03 | 2.11  | 3.126 | 169.1   |
| N21---H21...O22 | [1_555_02 ---> 7_655_02] |      | 1.03 | 1.85  | 2.873 | 170.5   |
| N23---H27...O11 | [1_555_02 ---> 1_555_01] |      | 1.06 | 2.64  | 3.337 | 122.8   |
| N23---H27...N12 | [1_555_02 ---> 1_555_01] |      | 1.06 | 1.74  | 2.792 | 171.7   |

#### 41\_SLFZ

12.2130 20.5500 13.5830 90.000 97.030 90.000 V = 3383.39

Space group: P21/c  
Symmetry operators read from CIF:  
[1] x,y,z  
[2] -x,y+0.50,-z+0.50  
[3] -x,-y,-z  
[4] x,-y+0.50,z+0.50

Z(prime) = 2  
Molecule 01 = C9 H9 N3 O2 S2  
Centroid = 0.9055 0.1596 0.9527  
Molecule 02 = C9 H9 N3 O2 S2  
Centroid = 0.4295 0.1585 0.4659

#### INTERMOLECULAR HYDROGEN BONDS

| D---H...A | ARU1 | ARU2 | D-H | H...A | D...A | D-H...A |
|-----------|------|------|-----|-------|-------|---------|
|-----------|------|------|-----|-------|-------|---------|

|                 |                          |  |      |      |       |       |
|-----------------|--------------------------|--|------|------|-------|-------|
| N11---H10...O21 | [1_555_01 ---> 4_555_02] |  | 1.02 | 2.42 | 3.311 | 144.6 |
| N11---H11...O22 | [1_555_01 ---> 1_555_02] |  | 1.02 | 2.19 | 3.163 | 159.1 |
| N13---H17...O11 | [1_555_01 ---> 3_757_01] |  | 1.06 | 2.57 | 3.245 | 120.7 |
| N13---H17...N12 | [1_555_01 ---> 3_757_01] |  | 1.06 | 1.72 | 2.782 | 173.6 |
| N21---H20...O11 | [1_555_02 ---> 4_454_01] |  | 1.02 | 2.17 | 3.111 | 151.2 |
| N21---H21...O12 | [1_555_02 ---> 1_454_01] |  | 1.02 | 2.24 | 3.224 | 161.4 |
| N23---H27...O21 | [1_555_02 ---> 3_656_02] |  | 1.06 | 2.57 | 3.263 | 123.0 |
| N23---H27...N22 | [1_555_02 ---> 3_656_02] |  | 1.06 | 1.78 | 2.828 | 171.3 |

#### 42\_SLFZ

8.3850 9.2720 20.7040 90.000 100.100 90.000 V = 1584.70

Space group: P21/c  
Symmetry operators read from CIF:  
[1] x,y,z  
[2] -x,y+0.50,-z+0.50  
[3] -x,-y,-z  
[4] x,-y+0.50,z+0.50

Z(prime) = 1  
Molecule 01 = C9 H9 N3 O2 S2  
Centroid = 0.5137 0.3011 0.3895

#### INTERMOLECULAR HYDROGEN BONDS

| D---H...A       | ARU1                     | ARU2 | D-H  | H...A | D...A | D-H...A |
|-----------------|--------------------------|------|------|-------|-------|---------|
| N11---H10...O11 | [1_555_01 ---> 1_655_01] |      | 1.03 | 1.96  | 2.970 | 166.7   |
| N11---H11...O11 | [1_555_01 ---> 2_655_01] |      | 1.02 | 2.24  | 3.216 | 159.4   |

#### 43\_SLFZ

8.6514 8.6514 20.5380 90.000 90.000 90.000 V = 1537.20

Space group: P43  
Symmetry operators read from CIF:  
[1] x,y,z  
[2] -y,x,z+0.75  
[3] -x,-y,z+0.50  
[4] y,-x,z+0.25

### S3. Geometrical parameters of hydrogen bonds between SLFZ molecules

Z(prime) = 1  
Molecule 01 = C9 H9 N3 O2 S2  
Centroid = 0.2244 0.8556 0.1884

#### INTERMOLECULAR HYDROGEN BONDS

```
-----  
D---H...A   ARU1   ARU2   D-H   H...A D...A D-H...A  
-----  
N11---H10...O11 [1_555_01 ---> 1_545_01] 1.03 1.86 2.890 173.2  
N11---H11...O12 [1_555_01 ---> 2_654_01] 1.02 2.28 2.973 123.5  
-----
```

#### 44\_SLFZ

10.7410 7.5920 16.7480 90.000 103.990 90.000 V = 1325.22

Space group: P21/c  
Symmetry operators read from CIF:  
[1] x,y,z  
[2] -x,y+0.50,-z+0.50  
[3] -x,-y,-z  
[4] x,-y+0.50,z+0.50

Z(prime) = 1  
Molecule 01 = C9 H9 N3 O2 S2  
Centroid = 0.8035 0.5458 0.6326

#### INTERMOLECULAR HYDROGEN BONDS

```
-----  
D---H...A   ARU1   ARU2   D-H   H...A D...A D-H...A  
-----  
N11---H10...O12 [1_555_01 ---> 2_746_01] 1.02 2.25 3.097 139.2  
N11---H11...O12 [1_555_01 ---> 4_565_01] 1.02 1.90 2.907 167.9  
N13---H17...O11 [1_555_01 ---> 3_666_01] 1.06 2.56 3.268 123.6  
N13---H17...N12 [1_555_01 ---> 3_666_01] 1.06 1.76 2.803 169.7  
-----
```

#### 45\_SLFZ

10.5390 12.1890 13.9810 95.290 107.380 90.630 V = 1705.30

Space group: P-1  
Symmetry operators read from CIF:  
[1] x,y,z

[2] -x,-y,-z

Z(prime) = 2  
Molecule 01 = C9 H9 N3 O2 S2  
Centroid = 0.7707 0.6571 0.2511  
Molecule 02 = C9 H9 N3 O2 S2  
Centroid = 0.2871 0.7528 0.3388

#### INTERMOLECULAR HYDROGEN BONDS

```
-----  
D---H...A   ARU1   ARU2   D-H   H...A D...A D-H...A  
-----  
N13---H17...N22 [1_555_01 ---> 1_555_02] 1.06 1.77 2.822 173.0  
N23---H27...O11 [1_555_02 ---> 1_555_01] 1.06 2.64 3.315 121.1  
N23---H27...N12 [1_555_02 ---> 1_555_01] 1.06 1.73 2.788 172.7  
-----
```

#### 46\_SLFZ

6.6309 15.0142 17.7082 90.000 94.551 90.000 V = 1757.43

Space group: P21/n  
Symmetry operators read from CIF:  
[1] x,y,z  
[2] -x+0.50,y+0.50,-z+0.50  
[3] -x,-y,-z  
[4] x+0.50,-y+0.50,z+0.50

Z(prime) = 1  
Molecule 01 = C9 H9 N3 O2 S2  
Centroid = 0.1344 0.2002 0.3872

#### INTERMOLECULAR HYDROGEN BONDS

```
-----  
D---H...A   ARU1   ARU2   D-H   H...A D...A D-H...A  
-----  
N11---H10...O12 [1_555_01 ---> 2_555_01] 1.03 1.95 2.953 165.8  
N11---H11...O11 [1_555_01 ---> 2_455_01] 1.02 2.14 3.017 142.7  
N13---H17...N12 [1_555_01 ---> 3_556_01] 1.06 1.77 2.825 174.2  
-----
```

#### 47\_SLFZ

9.4240 17.1950 19.5600 90.000 90.000 90.000 V = 3169.61

### S3. Geometrical parameters of hydrogen bonds between SLFZ molecules

Space group: Pbc<sub>a</sub>

Symmetry operators read from CIF:

- [1] x,y,z
- [2] -x+0.50,-y,z+0.50
- [3] x+0.50,-y+0.50,-z
- [4] -x,y+0.50,-z+0.50
- [5] -x,-y,-z
- [6] x+0.50,y,-z+0.50
- [7] -x+0.50,y+0.50,z
- [8] x,-y+0.50,z+0.50

Z(prime) = 1

Molecule 01 = C9 H9 N3 O2 S2

Centroid = 0.4932 0.3827 0.3521

#### INTERMOLECULAR HYDROGEN BONDS

```
-----
D---H...A   ARU1   ARU2   D-H   H...A D...A D-H...A
-----
N11---H10...O12 [1_555_01 ---> 4_645_01] 1.02 2.07 2.972 145.0
N11---H11...O11 [1_555_01 ---> 7_645_01] 1.03 2.08 3.074 162.8
N13---H17...N12 [1_555_01 ---> 5_666_01] 1.06 1.72 2.787 176.8
-----
```

#### 48\_SLFZ

8.3550 40.1040 9.3390 90.000 111.130 90.000 V = 2918.82

Space group: P21/n

Symmetry operators read from CIF:

- [1] x,y,z
- [2] -x+0.50,y+0.50,-z+0.50
- [3] -x,-y,-z
- [4] x+0.50,-y+0.50,z+0.50

Z(prime) = 1

Molecule 01 = C9 H9 N3 O2 S2

Centroid = 0.0524 0.8231 0.4178

#### INTERMOLECULAR HYDROGEN BONDS

```
-----
D---H...A   ARU1   ARU2   D-H   H...A D...A D-H...A
-----
N11---H10...O11 [1_555_01 ---> 1_455_01] 1.03 1.97 2.972 165.8
-----
```

N11---H10...N12 [1\_555\_01 ---> 1\_455\_01] 1.03 2.67 3.434 131.0

N11---H11...O11 [1\_555\_01 ---> 4\_465\_01] 1.03 1.94 2.940 164.2

#### 49\_SLFZ

10.1706 10.8646 16.1335 90.000 105.054 90.000 V = 1721.56

Space group: P21/c

Symmetry operators read from CIF:

- [1] x,y,z
- [2] -x,y+0.50,-z+0.50
- [3] -x,-y,-z
- [4] x,-y+0.50,z+0.50

Z(prime) = 1

Molecule 01 = C9 H9 N3 O2 S2

Centroid = 0.7426 0.1862 0.1835

#### INTERMOLECULAR HYDROGEN BONDS

```
-----
D---H...A   ARU1   ARU2   D-H   H...A D...A D-H...A
-----
N11---H10...O12 [1_555_01 ---> 4_555_01] 1.03 2.28 3.249 156.8
N11---H11...O12 [1_555_01 ---> 2_645_01] 1.03 1.96 2.902 151.1
-----
```

#### 50\_SLFZ

8.8854 13.3231 14.7403 90.000 101.159 90.000 V = 1711.98

Space group: P21/n

Symmetry operators read from CIF:

- [1] x,y,z
- [2] -x+0.50,y+0.50,-z+0.50
- [3] -x,-y,-z
- [4] x+0.50,-y+0.50,z+0.50

Z(prime) = 1

Molecule 01 = C9 H9 N3 O2 S2

Centroid = 0.2737 0.9065 0.1164

#### INTERMOLECULAR HYDROGEN BONDS

### S3. Geometrical parameters of hydrogen bonds between SLFZ molecules

```
D---H...A   ARU1   ARU2   D-H   H...A D...A D-H...A
-----
N11---H10...O11 [1_555_01 ---> 1_455_01] 1.02 2.00 2.985 161.1
N11---H11...O12 [1_555_01 ---> 2_555_01] 1.02 2.12 3.080 156.2
N13---H17...N12 [1_555_01 ---> 3_675_01] 1.06 1.76 2.819 177.0
```

#### 51\_SLFZ

```
10.5317 8.5508 21.7500 90.000 91.055 90.000 V = 1958.35
```

Space group: P21/n

Symmetry operators read from CIF:

```
[1] x,y,z
[2] -x+0.50,y+0.50,-z+0.50
[3] -x,-y,-z
[4] x+0.50,-y+0.50,z+0.50
```

Z(prime) = 1

Molecule 01 = C9 H9 N3 O2 S2

Centroid = 0.9268 0.6037 0.7431

#### INTERMOLECULAR HYDROGEN BONDS

```
D---H...A   ARU1   ARU2   D-H   H...A D...A D-H...A
-----
N11---H11...O11 [1_555_01 ---> 2_756_01] 1.03 1.99 3.001 167.6
```

#### 52\_SLFZ

```
8.2576 12.1531 16.5609 90.000 98.785 90.000 V = 1642.48
```

Space group: P21/c

Symmetry operators read from CIF:

```
[1] x,y,z
[2] -x,y+0.50,-z+0.50
[3] -x,-y,-z
[4] x,-y+0.50,z+0.50
```

Z(prime) = 1

Molecule 01 = C9 H9 N3 O2 S2

Centroid = 0.2590 0.4039 0.6327

#### INTERMOLECULAR HYDROGEN BONDS

```
D---H...A   ARU1   ARU2   D-H   H...A D...A D-H...A
-----
N11---H10...O11 [1_555_01 ---> 1_455_01] 1.02 2.05 2.997 153.6
N13---H17...N12 [1_555_01 ---> 3_666_01] 1.06 1.75 2.802 170.9
```

#### 53\_SLFZ

```
9.1350 5.3790 36.6330 90.000 91.170 90.000 V = 1799.67
```

Space group: P21/c

Symmetry operators read from CIF:

```
[1] x,y,z
[2] -x,y+0.50,-z+0.50
[3] -x,-y,-z
[4] x,-y+0.50,z+0.50
```

Z(prime) = 1

Molecule 01 = C9 H9 N3 O2 S2

Centroid = 0.1959 0.1322 0.4407

#### INTERMOLECULAR HYDROGEN BONDS

```
D---H...A   ARU1   ARU2   D-H   H...A D...A D-H...A
-----
N13---H17...N12 [1_555_01 ---> 3_656_01] 1.06 1.74 2.800 175.8
```

#### 54\_SLFZ

```
11.0200 9.0100 20.1860 90.000 113.680 90.000 V = 1835.52
```

Space group: P21/c

Symmetry operators read from CIF:

```
[1] x,y,z
[2] -x,y+0.50,-z+0.50
[3] -x,-y,-z
[4] x,-y+0.50,z+0.50
```

Z(prime) = 1

Molecule 01 = C9 H9 N3 O2 S2

Centroid = 0.2188 0.4017 0.1777

### S3. Geometrical parameters of hydrogen bonds between SLFZ molecules

#### INTERMOLECULAR HYDROGEN BONDS

D---H...A    ARU1    ARU2    D-H    H...A D...A    D-H...A

N13---H17...N12 [1\_555\_01 ---> 3\_565\_01] 1.06 1.75 2.804 173.9

#### 55\_SLFZ

8.8109 12.7222 13.1696 66.227 73.797 88.068 V = 1292.09

Space group: P-1

Symmetry operators read from CIF:

[1] x,y,z

[2] -x,-y,-z

Z(prime) = 1

Molecule 01 = C9 H9 N3 O2 S2

Centroid = 0.2252 0.1192 1.0460

#### INTERMOLECULAR HYDROGEN BONDS

D---H...A    ARU1    ARU2    D-H    H...A D...A    D-H...A

#### 56\_SLFZ

8.5007 18.8407 10.5066 90.000 104.507 90.000 V = 1629.08

Space group: P21/n

Symmetry operators read from CIF:

[1] x,y,z

[2] -x+0.50,y+0.50,-z+0.50

[3] -x,-y,-z

[4] x+0.50,-y+0.50,z+0.50

Z(prime) = 1

Molecule 01 = C9 H9 N3 O2 S2

Centroid = 0.5898 0.3682 0.6642

#### INTERMOLECULAR HYDROGEN BONDS

D---H...A    ARU1    ARU2    D-H    H...A D...A    D-H...A

N11---H10...O11 [1\_555\_01 ---> 1\_655\_01] 1.03 1.93 2.946 171.4

N11---H11...O12 [1\_555\_01 ---> 4\_554\_01] 1.03 1.93 2.955 172.7

#### 57\_SLFZ

8.3577 19.2806 10.9972 90.000 105.064 90.000 V = 1711.21

Space group: P21/n

Symmetry operators read from CIF:

[1] x,y,z

[2] -x+0.50,y+0.50,-z+0.50

[3] -x,-y,-z

[4] x+0.50,-y+0.50,z+0.50

Z(prime) = 1

Molecule 01 = C9 H9 N3 O2 S2

Centroid = 0.6026 0.3693 0.6601

#### INTERMOLECULAR HYDROGEN BONDS

D---H...A    ARU1    ARU2    D-H    H...A D...A    D-H...A

N11---H10...O11 [1\_555\_01 ---> 1\_655\_01] 1.03 1.99 2.994 164.7

N11---H11...O12 [1\_555\_01 ---> 4\_554\_01] 1.03 2.00 3.010 167.4

#### 58\_SLFZ

8.4031 19.2762 10.9624 90.000 106.229 90.000 V = 1704.93

Space group: P21/n

Symmetry operators read from CIF:

[1] x,y,z

[2] -x+0.50,y+0.50,-z+0.50

[3] -x,-y,-z

[4] x+0.50,-y+0.50,z+0.50

Z(prime) = 1

Molecule 01 = C9 H9 N3 O2 S2

Centroid = 0.6003 0.3686 0.6603

### S3. Geometrical parameters of hydrogen bonds between SLFZ molecules

#### INTERMOLECULAR HYDROGEN BONDS

```
-----  
D---H...A   ARU1   ARU2   D-H   H...A D...A D-H...A  
-----  
N11---H10...O11 [1_555_01 ---> 1_655_01] 1.03 1.96 2.972 167.5  
N11---H11...O12 [1_555_01 ---> 4_554_01] 1.03 1.98 2.981 165.2  
-----
```

#### 59\_SLFZ

8.3786 19.6447 11.1172 90.000 106.885 90.000 V = 1750.95

Space group: P21/n

Symmetry operators read from CIF:

```
[1] x,y,z  
[2] -x+0.50,y+0.50,-z+0.50  
[3] -x,-y,-z  
[4] x+0.50,-y+0.50,z+0.50
```

Z(prime) = 1

Molecule 01 = C9 H9 N3 O2 S2

Centroid = 0.5986 0.3691 0.6506

#### INTERMOLECULAR HYDROGEN BONDS

```
-----  
D---H...A   ARU1   ARU2   D-H   H...A D...A D-H...A  
-----  
N11---H10...O11 [1_555_01 ---> 1_655_01] 1.03 1.95 2.965 168.3  
N11---H11...O12 [1_555_01 ---> 4_554_01] 1.03 2.01 3.006 163.5  
-----
```

#### 60\_SLFZ

13.9430 9.2600 12.6980 90.000 90.000 90.000 V = 1639.47

Space group: Pna21

Symmetry operators read from CIF:

```
[1] x,y,z  
[2] -x,-y,z+0.50  
[3] -x+0.50,y+0.50,z+0.50  
[4] x+0.50,-y+0.50,z
```

Z(prime) = 1

Molecule 01 = C9 H8 N3 O2 S2

Centroid = 0.6445 0.8381 0.5772

#### INTERMOLECULAR HYDROGEN BONDS

```
-----  
D---H...A   ARU1   ARU2   D-H   H...A D...A D-H...A  
-----  
N11---H10...O12 [1_555_01 ---> 3_655_01] 1.03 1.94 2.947 166.9  
N11---H11...O11 [1_555_01 ---> 2_675_01] 1.03 2.39 3.176 133.2  
N11---H11...N12 [1_555_01 ---> 2_675_01] 1.03 2.37 3.334 156.4  
-----
```

#### 61\_SLFZ

15.8070 10.1260 10.7540 90.000 90.000 90.000 V = 1721.30

Space group: Pna21

Symmetry operators read from CIF:

```
[1] x,y,z  
[2] -x,-y,z+0.50  
[3] -x+0.50,y+0.50,z+0.50  
[4] x+0.50,-y+0.50,z
```

Z(prime) = 1

Molecule 01 = C9 H8 N3 O2 S2

Centroid = 0.3997 0.3469 0.3684

#### INTERMOLECULAR HYDROGEN BONDS

```
-----  
D---H...A   ARU1   ARU2   D-H   H...A D...A D-H...A  
-----  
N11---H10...N12 [1_555_01 ---> 2_664_01] 1.03 2.04 3.065 173.5  
N11---H11...O11 [1_555_01 ---> 3_554_01] 1.03 1.94 2.936 161.1  
-----
```

#### 62\_SLFZ

6.9480 14.8680 15.9580 90.000 90.000 90.000 V = 1648.51

Space group: P212121

Symmetry operators read from CIF:

```
[1] x,y,z  
[2] -x+0.50,-y,z+0.50  
[3] x+0.50,-y+0.50,-z  
[4] -x,y+0.50,-z+0.50
```

### S3. Geometrical parameters of hydrogen bonds between SLFZ molecules

Z(prime) = 1  
Molecule 01 = C9 H8 N3 O2 S2  
Centroid = 0.2044 0.2572 0.3162

#### INTERMOLECULAR HYDROGEN BONDS

| D---H...A       | ARU1                     | ARU2 | D-H  | H...A | D...A | D-H...A |
|-----------------|--------------------------|------|------|-------|-------|---------|
| N11---H10...O12 | [1_555_01 ---> 4_545_01] |      | 1.03 | 1.92  | 2.935 | 165.9   |
| N11---H11...O11 | [1_555_01 ---> 4_645_01] |      | 1.03 | 2.38  | 3.329 | 152.4   |
| N11---H11...N12 | [1_555_01 ---> 4_645_01] |      | 1.03 | 2.34  | 3.231 | 143.3   |

#### 63\_SLFZ

6.5920 15.1550 15.6890 90.000 90.000 90.000 V = 1567.36

Space group: P212121  
Symmetry operators read from CIF:

[1] x,y,z  
[2] -x+0.50,-y,z+0.50  
[3] x+0.50,-y+0.50,-z  
[4] -x,y+0.50,-z+0.50

Z(prime) = 1  
Molecule 01 = C9 H8 N3 O2 S2  
Centroid = 0.2001 0.2691 0.3180

#### INTERMOLECULAR HYDROGEN BONDS

| D---H...A       | ARU1                     | ARU2 | D-H  | H...A | D...A | D-H...A |
|-----------------|--------------------------|------|------|-------|-------|---------|
| N11---H10...O12 | [1_555_01 ---> 4_545_01] |      | 1.04 | 1.87  | 2.896 | 171.6   |
| N11---H11...O11 | [1_555_01 ---> 4_645_01] |      | 1.03 | 2.24  | 3.202 | 154.4   |
| N11---H11...N12 | [1_555_01 ---> 4_645_01] |      | 1.03 | 2.39  | 3.211 | 135.9   |

#### 64\_SLFZ

17.5620 42.7200 8.2910 90.000 90.000 90.000 V = 6220.31

Space group: Fdd2  
Symmetry operators read from CIF:

[1] x,y,z  
[2] -x,-y,z  
[3] -x+0.25,y+0.25,z+0.25  
[4] x+0.75,-y+0.75,z+0.25  
[5] x,y+0.50,z+0.50  
[6] -x,-y+0.50,z+0.50  
[7] -x+0.25,y+0.75,z+0.75  
[8] x+0.75,-y+0.25,z+0.75  
[9] x+0.50,y,z+0.50  
[10] -x+0.50,-y,z+0.50  
[11] -x+0.75,y+0.25,z+0.75  
[12] x+0.25,-y+0.75,z+0.75  
[13] x+0.50,y+0.50,z  
[14] -x+0.50,-y+0.50,z  
[15] -x+0.75,y+0.75,z+0.25  
[16] x+0.25,-y+0.25,z+0.25

Z(prime) = 1  
Molecule 01 = C9 H8 N3 O2 S2  
Centroid = 0.3074 0.4368 0.5624

#### INTERMOLECULAR HYDROGEN BONDS

| D---H...A       | ARU1                      | ARU2 | D-H  | H...A | D...A | D-H...A |
|-----------------|---------------------------|------|------|-------|-------|---------|
| N11---H10...O11 | [1_555_01 ---> 1_556_01]  |      | 1.03 | 2.03  | 2.989 | 153.8   |
| N11---H11...O11 | [1_555_01 ---> 12_555_01] |      | 1.03 | 1.92  | 2.954 | 174.7   |

#### 65\_SLFZ

10.4490 13.3310 13.6640 90.000 110.380 90.000 V = 1784.19

Space group: P21  
Symmetry operators read from CIF:  
[1] x,y,z  
[2] -x,y+0.50,-z

Z(prime) = 2  
Molecule 01 = C9 H8 N3 O2 S2  
Centroid = 0.6668 0.8420 0.4395  
Molecule 02 = C9 H8 N3 O2 S2  
Centroid = 0.3113 0.3231 0.0805

#### INTERMOLECULAR HYDROGEN BONDS

### S3. Geometrical parameters of hydrogen bonds between SLFZ molecules

```
-----  
D---H...A   ARU1   ARU2   D-H   H...A D...A D-H...A  
-----  
N11---H10...O12 [1_555_01 ---> 2_646_01] 1.03 1.98 2.991 168.6  
N11---H11...O21 [1_555_01 ---> 1_555_02] 1.03 1.94 2.964 172.3  
N21---H20...O22 [1_555_02 ---> 2_645_02] 1.03 2.04 3.023 158.7  
N21---H21...O11 [1_555_02 ---> 1_545_01] 1.03 1.91 2.913 164.9
```

#### 66\_SLFZ

```
=====
```

8.0810 16.6760 13.1690 90.000 104.560 90.000 V = 1717.65

Space group: P21/c

Symmetry operators read from CIF:

- [1] x,y,z
- [2] -x,y+0.50,-z+0.50
- [3] -x,-y,-z
- [4] x,-y+0.50,z+0.50

Z(prime) = 1

Molecule 01 = C9 H8 N3 O2 S2

Centroid = 0.1193 0.8625 0.7004

#### INTERMOLECULAR HYDROGEN BONDS

```
-----  
D---H...A   ARU1   ARU2   D-H   H...A D...A D-H...A  
-----  
N11---H10...O11 [1_555_01 ---> 4_564_01] 1.03 1.99 2.966 156.6  
N11---H11...N13 [1_555_01 ---> 2_546_01] 1.03 1.98 3.009 172.2
```

#### 67\_SLFZ

```
=====
```

20.6230 8.3200 18.1570 90.000 115.640 90.000 V = 2808.66

Space group: P21/c

Symmetry operators read from CIF:

- [1] x,y,z
- [2] -x,y+0.50,-z+0.50
- [3] -x,-y,-z
- [4] x,-y+0.50,z+0.50

Z(prime) = 2

Molecule 01 = C9 H8 N3 O2 S2  
Centroid = 0.0914 0.4719 0.6692  
Molecule 02 = C9 H8 N3 O2 S2  
Centroid = 0.4023 0.9766 0.5681

#### INTERMOLECULAR HYDROGEN BONDS

```
-----  
D---H...A   ARU1   ARU2   D-H   H...A D...A D-H...A  
-----  
N11---H10...O11 [1_555_01 ---> 1_565_01] 1.03 1.91 2.929 169.5  
N11---H11...O22 [1_555_01 ---> 1_555_02] 1.03 2.40 3.337 151.6  
N21---H20...O21 [1_555_02 ---> 1_565_02] 1.03 1.82 2.839 169.4  
N21---H21...O11 [1_555_02 ---> 4_564_01] 1.03 2.00 3.025 174.6
```

#### 68\_SLFZ

```
=====
```

10.8380 11.8260 22.3210 90.000 90.140 90.000 V = 2860.88

Space group: C2/c

Symmetry operators read from CIF:

- [1] x,y,z
- [2] -x,y,-z+0.50
- [3] -x,-y,-z
- [4] x,-y,z+0.50
- [5] x+0.50,y+0.50,z
- [6] -x+0.50,y+0.50,-z+0.50
- [7] -x+0.50,-y+0.50,-z
- [8] x+0.50,-y+0.50,z+0.50

Z(prime) = 1

Molecule 01 = C9 H8 N3 O2 S2

Centroid = 0.5389 0.7346 0.5353

#### INTERMOLECULAR HYDROGEN BONDS

```
-----  
D---H...A   ARU1   ARU2   D-H   H...A D...A D-H...A  
-----  
N11---H10...O11 [1_555_01 ---> 3_676_01] 1.03 2.06 3.019 153.4  
N11---H11...N13 [1_555_01 ---> 7_666_01] 1.04 2.02 3.059 176.7
```

#### 69\_SLFZ



### S3. Geometrical parameters of hydrogen bonds between SLFZ molecules

8.4010 11.1420 17.7460 90.000 90.000 90.000 V = 1661.10

Space group: P212121

Symmetry operators read from CIF:

- [1] x,y,z
- [2] -x+0.50,-y,z+0.50
- [3] x+0.50,-y+0.50,-z
- [4] -x,y+0.50,-z+0.50

Z(prime) = 1

Molecule 01 = C9 H8 N3 O2 S2

Centroid = 0.5452 0.5642 0.3903

#### INTERMOLECULAR HYDROGEN BONDS

D---H...A ARU1 ARU2 D-H H...A D...A D-H...A

N11---H10...O11 [1\_555\_01 ---> 1\_455\_01] 1.04 1.95 2.977 173.2

N11---H11...O12 [1\_555\_01 ---> 4\_645\_01] 1.03 2.50 3.394 145.7

#### 70\_SLFZ

13.9493 8.3273 16.9440 90.000 113.288 90.000 V = 1807.86

Space group: P21/c

Symmetry operators read from CIF:

- [1] x,y,z
- [2] -x,y+0.50,-z+0.50
- [3] -x,-y,-z
- [4] x,-y+0.50,z+0.50

Z(prime) = 1

Molecule 01 = C9 H8 N3 O2 S2

Centroid = 0.8360 0.5287 0.5691

#### INTERMOLECULAR HYDROGEN BONDS

D---H...A ARU1 ARU2 D-H H...A D...A D-H...A

N11---H10...N11 [1\_555\_01 ---> 3\_776\_01] 1.02 2.56 3.069 110.3

N11---H11...O12 [1\_555\_01 ---> 1\_565\_01] 1.03 1.94 2.931 161.8

#### 71\_SLFZ

17.7230 11.6840 11.9380 90.000 91.780 90.000 V = 2470.87

Space group: C2/c

Symmetry operators read from CIF:

- [1] x,y,z
- [2] -x,y,-z+0.50
- [3] -x,-y,-z
- [4] x,-y,z+0.50
- [5] x+0.50,y+0.50,z
- [6] -x+0.50,y+0.50,-z+0.50
- [7] -x+0.50,-y+0.50,-z
- [8] x+0.50,-y+0.50,z+0.50

Z(prime) = 1

Molecule 01 = C9 H10 N3 O2 S2

Centroid = 0.3837 0.4982 0.5869

#### INTERMOLECULAR HYDROGEN BONDS

D---H...A ARU1 ARU2 D-H H...A D...A D-H...A

N11---H11...N12 [1\_555\_01 ---> 3\_666\_01] 1.07 1.82 2.854 160.4

#### 72\_SLFZ

6.6200 15.3490 17.1480 90.000 90.000 90.000 V = 1742.41

Space group: P212121

Symmetry operators read from CIF:

- [1] x,y,z
- [2] -x+0.50,-y,z+0.50
- [3] x+0.50,-y+0.50,-z
- [4] -x,y+0.50,-z+0.50

Z(prime) = 1

Molecule 01 = C9 H8 N3 O2 S2

Centroid = 0.1911 0.2876 0.3449

#### INTERMOLECULAR HYDROGEN BONDS

D---H...A ARU1 ARU2 D-H H...A D...A D-H...A

### S3. Geometrical parameters of hydrogen bonds between SLFZ molecules

N11---H10...O12 [1\_555\_01 ---> 4\_545\_01] 1.03 1.88 2.909 175.2  
N11---H11...O11 [1\_555\_01 ---> 4\_645\_01] 1.03 1.95 2.942 162.3

#### 73\_SLFZ

8.4158 10.1810 17.9410 90.000 90.000 90.000 V = 1537.21

Space group: P212121

Symmetry operators read from CIF:

[1] x,y,z  
[2] -x+0.50,-y,z+0.50  
[3] x+0.50,-y+0.50,-z  
[4] -x,y+0.50,-z+0.50

Z(prime) = 1

Molecule 01 = C9 H8 N3 O2 S2

Centroid = 0.5234 0.5544 0.3960

#### INTERMOLECULAR HYDROGEN BONDS

D---H...A ARU1 ARU2 D-H H...A D...A D-H...A

N11---H10...O11 [1\_555\_01 ---> 1\_455\_01] 1.03 2.08 3.082 165.4  
N11---H11...O11 [1\_555\_01 ---> 4\_645\_01] 1.02 2.24 3.263 175.5  
N11---H11...O12 [1\_555\_01 ---> 4\_645\_01] 1.02 2.68 3.332 121.7

#### 74\_SLFZ

12.1060 10.4210 8.2840 102.980 90.030 107.720 V = 967.39

Space group: P-1

Symmetry operators read from CIF:

[1] x,y,z  
[2] -x,-y,-z

Z(prime) = 1

Molecule 01 = C9 H8 N3 O2 S2

Centroid = 0.3129 0.3338 0.1730

#### INTERMOLECULAR HYDROGEN BONDS

D---H...A ARU1 ARU2 D-H H...A D...A D-H...A

#### 75\_SLFZ

8.0392 19.9339 8.6360 90.000 97.715 90.000 V = 1371.41

Space group: P21/c

Symmetry operators read from CIF:

[1] x,y,z  
[2] -x,y+0.50,-z+0.50  
[3] -x,-y,-z  
[4] x,-y+0.50,z+0.50

Z(prime) = 1

Molecule 01 = C9 H10 N3 O2 S2

Centroid = -0.1295 0.6115 0.1502

#### INTERMOLECULAR HYDROGEN BONDS

D---H...A ARU1 ARU2 D-H H...A D...A D-H...A

N11---H10...N12 [1\_555\_01 ---> 1\_455\_01] 1.06 1.95 2.999 170.0  
N11---H11...O11 [1\_555\_01 ---> 4\_464\_01] 1.04 2.31 2.790 106.5

#### 76\_SLFZ

10.6915 10.5459 13.2126 90.000 112.410 90.000 V = 1377.23

Space group: P21/c

Symmetry operators read from CIF:

[1] x,y,z  
[2] -x,y+0.50,-z+0.50  
[3] -x,-y,-z  
[4] x,-y+0.50,z+0.50

Z(prime) = 1

Molecule 01 = C9 H10 N3 O2 S2

Centroid = 0.0511 0.7303 0.1311

#### INTERMOLECULAR HYDROGEN BONDS

D---H...A ARU1 ARU2 D-H H...A D...A D-H...A

### S3. Geometrical parameters of hydrogen bonds between SLFZ molecules

N13---H17...O12 [1\_555\_01 ---> 4\_564\_01] 1.04 1.83 2.805 155.4

#### 77\_SLFZ

7.8774 12.1090 16.2492 90.000 105.532 90.000 V = 1493.37

Space group: P21/c

Symmetry operators read from CIF:

- [1] x,y,z
- [2] -x,y+0.50,-z+0.50
- [3] -x,-y,-z
- [4] x,-y+0.50,z+0.50

Z(prime) = 1

Molecule 01 = C9 H8 N3 O2 S2

Centroid = 0.7578 0.5305 0.6129

#### INTERMOLECULAR HYDROGEN BONDS

D---H...A ARU1 ARU2 D-H H...A D...A D-H...A

N11---H11...N13 [1\_555\_01 ---> 3\_666\_01] 1.03 2.04 3.070 173.8

#### 78\_SLFZ

8.9763 11.4441 17.3672 90.000 99.299 90.000 V = 1760.61

Space group: P21/c

Symmetry operators read from CIF:

- [1] x,y,z
- [2] -x,y+0.50,-z+0.50
- [3] -x,-y,-z
- [4] x,-y+0.50,z+0.50

Z(prime) = 1

Molecule 01 = C9 H8 N3 O2 S2

Centroid = 0.2107 0.6386 0.3662

#### INTERMOLECULAR HYDROGEN BONDS

D---H...A ARU1 ARU2 D-H H...A D...A D-H...A

N11---H10...O11 [1\_555\_01 ---> 2\_545\_01] 1.03 1.97 2.963 160.9

N11---H11...N12 [1\_555\_01 ---> 4\_564\_01] 1.03 2.12 3.145 174.6

#### 79\_SLFZ

8.0122 12.7431 16.7992 90.000 102.200 90.000 V = 1676.47

Space group: P21/c

Symmetry operators read from CIF:

- [1] x,y,z
- [2] -x,y+0.50,-z+0.50
- [3] -x,-y,-z
- [4] x,-y+0.50,z+0.50

Z(prime) = 1

Molecule 01 = C9 H8 N3 O2 S2

Centroid = 0.7460 0.5316 0.6074

#### INTERMOLECULAR HYDROGEN BONDS

D---H...A ARU1 ARU2 D-H H...A D...A D-H...A

N11---H11...N13 [1\_555\_01 ---> 3\_666\_01] 1.03 2.20 3.217 169.9

#### 80\_SLFZ

13.8930 11.7710 22.1910 90.000 91.401 90.000 V = 3627.91

Space group: P21/c

Symmetry operators read from CIF:

- [1] x,y,z
- [2] -x,y+0.50,-z+0.50
- [3] -x,-y,-z
- [4] x,-y+0.50,z+0.50

Z(prime) = 2

Molecule 01 = C9 H8 N3 O2 S2

Centroid = 0.2218 0.2435 0.5565

Molecule 02 = C9 H8 N3 O2 S2

Centroid = 0.2934 0.7196 0.7023

### S3. Geometrical parameters of hydrogen bonds between SLFZ molecules

#### INTERMOLECULAR HYDROGEN BONDS

```
-----  
D---H...A   ARU1   ARU2   D-H   H...A D...A D-H...A  
-----  
N11---H11...O22 [1_555_01 ---> 1_555_02] 1.02 2.06 3.022 155.6  
N21---H20...O11 [1_555_02 ---> 3_666_01] 1.02 2.15 3.167 169.3  
N21---H20...O12 [1_555_02 ---> 3_666_01] 1.02 2.67 3.417 129.9  
N21---H21...O12 [1_555_02 ---> 1_565_01] 1.02 2.13 3.126 164.7
```

#### 81\_SLFZ

```
=====
```

12.1917 7.6348 15.3895 90.000 107.466 90.000 V = 1366.43

Space group: P21/c

Symmetry operators read from CIF:

```
[1] x,y,z  
[2] -x,y+0.50,-z+0.50  
[3] -x,-y,-z  
[4] x,-y+0.50,z+0.50
```

Z(prime) = 1

Molecule 01 = C9 H10 N3 O2 S2

Centroid = 0.7962 0.2607 0.4827

#### INTERMOLECULAR HYDROGEN BONDS

```
-----  
D---H...A   ARU1   ARU2   D-H   H...A D...A D-H...A  
-----  
N11---H11...O11 [1_555_01 ---> 4_554_01] 1.05 1.84 2.886 172.4  
N11---H11...N12 [1_555_01 ---> 4_554_01] 1.05 2.45 3.032 113.8
```

#### 82\_SLFZ

```
=====
```

12.1790 9.6098 13.3530 90.000 101.920 90.000 V = 1529.11

Space group: P21/n

Symmetry operators read from CIF:

```
[1] x,y,z  
[2] -x+0.50,y+0.50,-z+0.50  
[3] -x,-y,-z  
[4] x+0.50,-y+0.50,z+0.50
```

Z(prime) = 1

Molecule 01 = C9 H8 N3 O2 S2

Centroid = 0.3678 0.3201 0.5715

#### INTERMOLECULAR HYDROGEN BONDS

```
-----  
D---H...A   ARU1   ARU2   D-H   H...A D...A D-H...A  
-----  
N11---H10...O11 [1_555_01 ---> 2_556_01] 1.02 2.14 3.002 140.9  
N11---H11...O11 [1_555_01 ---> 4_555_01] 1.03 1.90 2.923 171.4
```

#### 83\_SLFZ

```
=====
```

14.9484 8.2585 22.9621 90.000 100.818 90.000 V = 2784.33

Space group: P21/n

Symmetry operators read from CIF:

```
[1] x,y,z  
[2] -x+0.50,y+0.50,-z+0.50  
[3] -x,-y,-z  
[4] x+0.50,-y+0.50,z+0.50
```

Z(prime) = 2

Molecule 01 = C9 H10 N3 O2 S2

Centroid = 0.8503 0.4097 0.5663

Molecule 02 = C9 H10 N3 O2 S2

Centroid = 0.5779 0.5844 0.3003

#### INTERMOLECULAR HYDROGEN BONDS

```
-----  
D---H...A   ARU1   ARU2   D-H   H...A D...A D-H...A  
-----  
N11---H10...O11 [1_555_01 ---> 1_565_01] 1.05 1.82 2.858 168.4  
N11---H10...O21 [1_555_01 ---> 1_555_02] 1.05 2.65 3.234 114.5  
N11---H10...N12 [1_555_01 ---> 1_565_01] 1.05 2.69 3.157 106.4  
N21---H20...O21 [1_555_02 ---> 1_545_02] 1.05 1.77 2.820 173.3  
N21---H20...N22 [1_555_02 ---> 1_545_02] 1.05 2.57 3.239 120.7
```

#### 84\_SLFZ

```
=====
```

8.0557 9.9422 17.2090 90.000 90.570 90.000 V = 1378.22

### S3. Geometrical parameters of hydrogen bonds between SLFZ molecules

Space group: P21/c

Symmetry operators read from CIF:

- [1] x,y,z
- [2] -x,y+0.50,-z+0.50
- [3] -x,-y,-z
- [4] x,-y+0.50,z+0.50

Z(prime) = 1

Molecule 01 = C9 H10 N3 O2 S2

Centroid = 0.4597 0.3989 0.1873

#### INTERMOLECULAR HYDROGEN BONDS

| D---H...A       | ARU1                     | ARU2 | D-H  | H...A | D...A | D-H...A |
|-----------------|--------------------------|------|------|-------|-------|---------|
| N11---H10...O11 | [1_555_01 ---> 2_655_01] |      | 1.05 | 2.49  | 2.921 | 103.3   |
| N11---H10...N12 | [1_555_01 ---> 2_655_01] |      | 1.05 | 1.96  | 2.967 | 158.7   |
| N11---H11...O12 | [1_555_01 ---> 1_655_01] |      | 1.05 | 1.76  | 2.806 | 171.7   |

#### 85\_SLFZ

17.4737 11.6240 11.7557 90.000 90.072 90.000 V = 2387.75

Space group: Cc

Symmetry operators read from CIF:

- [1] x,y,z
- [2] x,-y,z+0.50
- [3] x+0.50,y+0.50,z
- [4] x+0.50,-y+0.50,z+0.50

Z(prime) = 2

Molecule 01 = C9 H10 N3 O2 S2

Centroid = 0.3828 0.4878 0.5856

Molecule 02 = C9 H10 N3 O2 S2

Centroid = 0.6165 0.5066 0.4159

#### INTERMOLECULAR HYDROGEN BONDS

| D---H...A       | ARU1                     | ARU2 | D-H  | H...A | D...A | D-H...A |
|-----------------|--------------------------|------|------|-------|-------|---------|
| N11---H11...O21 | [1_555_01 ---> 1_555_02] |      | 1.06 | 2.56  | 3.246 | 122.1   |
| N11---H11...N22 | [1_555_01 ---> 1_555_02] |      | 1.06 | 1.84  | 2.828 | 153.5   |
| N21---H21...O11 | [1_555_02 ---> 1_555_01] |      | 1.06 | 2.66  | 3.261 | 115.6   |
| N21---H21...N12 | [1_555_02 ---> 1_555_01] |      | 1.06 | 1.94  | 2.924 | 153.0   |

#### 86\_SLFZ

15.5302 8.1448 28.4964 90.000 90.000 90.000 V = 3604.52

Space group: Pna21

Symmetry operators read from CIF:

- [1] x,y,z
- [2] -x,-y,z+0.50
- [3] -x+0.50,y+0.50,z+0.50
- [4] x+0.50,-y+0.50,z

Z(prime) = 2

Molecule 01 = C9 H10 N3 O2 S2

Centroid = 0.5558 0.7324 0.3473

Molecule 02 = C9 H10 N3 O2 S2

Centroid = 0.9459 0.7372 0.6523

#### INTERMOLECULAR HYDROGEN BONDS

| D---H...A       | ARU1                     | ARU2 | D-H  | H...A | D...A | D-H...A |
|-----------------|--------------------------|------|------|-------|-------|---------|
| N11---H10...O11 | [1_555_01 ---> 1_545_01] |      | 1.05 | 2.65  | 3.162 | 109.2   |
| N11---H10...N12 | [1_555_01 ---> 1_545_01] |      | 1.05 | 1.92  | 2.962 | 168.1   |
| N21---H20...O21 | [1_555_02 ---> 1_545_02] |      | 1.06 | 2.58  | 3.088 | 108.8   |
| N21---H20...N22 | [1_555_02 ---> 1_545_02] |      | 1.06 | 1.87  | 2.911 | 168.7   |

#### 87\_SLFZ

14.6389 5.9835 20.9270 90.000 94.783 90.000 V = 1826.65

Space group: P21/n

Symmetry operators read from CIF:

- [1] x,y,z
- [2] -x+0.50,y+0.50,-z+0.50
- [3] -x,-y,-z
- [4] x+0.50,-y+0.50,z+0.50

Z(prime) = 1

Molecule 01 = C9 H10 N3 O2 S2

Centroid = 0.0975 0.8760 0.4234

### S3. Geometrical parameters of hydrogen bonds between SLFZ molecules

#### INTERMOLECULAR HYDROGEN BONDS

D---H...A    ARU1    ARU2    D-H    H...A    D...A    D-H...A

N11---H11...N12 [1\_555\_01 ---> 3\_576\_01] 1.06 1.82 2.850 161.8

#### 88\_SLFZ

8.8101 17.1707 13.2499 90.000 101.100 90.000 V = 1966.89

Space group: P21/c

Symmetry operators read from CIF:

- [1] x,y,z
- [2] -x,y+0.50,-z+0.50
- [3] -x,-y,-z
- [4] x,-y+0.50,z+0.50

Z(prime) = 1

Molecule 01 = C9 H8 N3 O2 S2

Centroid = 0.2056 0.8747 0.7195

#### INTERMOLECULAR HYDROGEN BONDS

D---H...A    ARU1    ARU2    D-H    H...A    D...A    D-H...A

N11---H10...O11 [1\_555\_01 ---> 2\_646\_01] 1.02 2.67 3.286 119.0

N11---H11...O12 [1\_555\_01 ---> 2\_646\_01] 1.02 2.62 3.270 121.5

#### 89\_SLFZ

16.6760 11.7710 19.0620 90.000 111.710 90.000 V = 3476.33

Space group: P21

Symmetry operators read from CIF:

- [1] x,y,z
- [2] -x,y+0.50,-z

Z(prime) = 4

Molecule 01 = C9 H9 N3 O2 S2

Centroid = 0.5547 0.4991 0.5301

Molecule 02 = C9 H9 N3 O2 S2

Centroid = 0.0632 0.2789 0.5285

Molecule [2] = C9 H8 N3 O2 S2

Centroid = 0.4160 0.4781 0.9631

Molecule [3] = C9 H8 N3 O2 S2

Centroid = 0.9187 0.2890 0.9658

#### INTERMOLECULAR HYDROGEN BONDS

D---H...A    ARU1    ARU2    D-H    H...A    D...A    D-H...A

N11---H10...O11 [1\_555\_01 ---> 2\_656\_01] 1.03 2.57 3.167 116.3

N11---H10...N12 [1\_555\_01 ---> 2\_656\_01] 1.03 2.28 3.291 165.7

N11---H11...O21 [1\_555\_01 ---> 1\_555\_02] 1.03 2.12 3.121 163.8

N13---H17...N43 [1\_555\_01 ---> 1\_555\_04] 1.09 1.65 2.728 170.4

N21---H20...O21 [1\_555\_02 ---> 2\_546\_02] 1.03 2.43 3.174 128.3

N21---H20...N22 [1\_555\_02 ---> 2\_546\_02] 1.03 2.45 3.430 159.9

N21---H21...O11 [1\_555\_02 ---> 1\_455\_01] 1.03 2.24 3.190 153.1

N23---H27...N33 [1\_555\_02 ---> 1\_555\_03] 1.09 1.63 2.719 171.5

N31---H30...O31 [1\_555\_03 ---> 2\_657\_03] 1.03 1.99 2.921 148.5

N31---H31...O42 [1\_555\_03 ---> 1\_555\_04] 1.03 1.95 2.968 167.2

N41---H40...O41 [1\_555\_04 ---> 2\_747\_04] 1.03 1.97 2.908 149.4

N41---H41...O32 [1\_555\_04 ---> 1\_655\_03] 1.03 1.90 2.926 170.7

#### 90\_SLFZ

8.1838 13.3578 13.5189 86.787 79.557 76.493 V = 1413.03

Space group: P-1

Symmetry operators read from CIF:

- [1] x,y,z
- [2] -x,-y,-z

Z(prime) = 1

Molecule 01 = C9 H10 N3 O2 S2

Centroid = 0.0106 0.7458 0.4458

#### INTERMOLECULAR HYDROGEN BONDS

D---H...A    ARU1    ARU2    D-H    H...A    D...A    D-H...A

N11---H10...O11 [1\_555\_01 ---> 1\_455\_01] 1.06 2.55 3.174 117.1

N11---H10...N12 [1\_555\_01 ---> 1\_455\_01] 1.06 1.84 2.896 177.2

N11---H11...O11 [1\_555\_01 ---> 2\_566\_01] 1.05 1.76 2.777 161.7

### S3. Geometrical parameters of hydrogen bonds between SLFZ molecules

#### 91\_SLFZ

6.5105 19.1510 17.6624 90.000 98.689 90.000 V = 2176.92

Space group: P21/n

Symmetry operators read from CIF:

[1] x,y,z

[2] -x+0.50,y+0.50,-z+0.50

[3] -x,-y,-z

[4] x+0.50,-y+0.50,z+0.50

Z(prime) = 1

Molecule 01 = C9 H9 N3 O2 S2

Centroid = 0.2041 0.1962 0.2205

#### INTERMOLECULAR HYDROGEN BONDS

| D---H...A | ARU1 | ARU2 | D-H | H...A | D...A | D-H...A |
|-----------|------|------|-----|-------|-------|---------|
|-----------|------|------|-----|-------|-------|---------|

#### 92\_SLFZ

8.3346 9.7463 10.5348 101.762 93.929 93.843 V = 832.94

Space group: P-1

Symmetry operators read from CIF:

[1] x,y,z

[2] -x,-y,-z

Z(prime) = 1

Molecule 01 = C9 H9 N3 O2 S2

Centroid = 0.5055 0.6673 0.7648

#### INTERMOLECULAR HYDROGEN BONDS

| D---H...A | ARU1 | ARU2 | D-H | H...A | D...A | D-H...A |
|-----------|------|------|-----|-------|-------|---------|
|-----------|------|------|-----|-------|-------|---------|

|                 |                          |      |      |       |       |
|-----------------|--------------------------|------|------|-------|-------|
| N11---H10...O11 | [1_555_01 ---> 1_455_01] | 1.03 | 1.98 | 2.968 | 160.1 |
|-----------------|--------------------------|------|------|-------|-------|

|                 |                          |      |      |       |       |
|-----------------|--------------------------|------|------|-------|-------|
| N11---H11...O11 | [1_555_01 ---> 2_677_01] | 1.02 | 2.37 | 3.111 | 128.1 |
|-----------------|--------------------------|------|------|-------|-------|

#### 93\_SLFZ

8.2866 11.5419 15.4143 79.817 88.639 76.525 V = 1410.87

Space group: P-1

Symmetry operators read from CIF:

[1] x,y,z

[2] -x,-y,-z

Z(prime) = 2

Molecule 01 = C9 H9 N3 O2 S2

Centroid = 0.5343 0.8212 0.3987

Molecule 02 = C9 H9 N3 O2 S2

Centroid = 0.4240 0.6658 0.8358

#### INTERMOLECULAR HYDROGEN BONDS

| D---H...A | ARU1 | ARU2 | D-H | H...A | D...A | D-H...A |
|-----------|------|------|-----|-------|-------|---------|
|-----------|------|------|-----|-------|-------|---------|

|                 |                          |      |      |       |       |
|-----------------|--------------------------|------|------|-------|-------|
| N11---H11...O12 | [1_555_01 ---> 1_455_01] | 1.03 | 1.96 | 2.952 | 162.0 |
|-----------------|--------------------------|------|------|-------|-------|

|                 |                          |      |      |       |       |
|-----------------|--------------------------|------|------|-------|-------|
| N13---H17...O21 | [1_555_01 ---> 1_555_02] | 1.04 | 1.77 | 2.801 | 169.3 |
|-----------------|--------------------------|------|------|-------|-------|

|                 |                          |      |      |       |       |
|-----------------|--------------------------|------|------|-------|-------|
| N21---H20...O21 | [1_555_02 ---> 1_455_02] | 1.03 | 2.42 | 3.297 | 142.7 |
|-----------------|--------------------------|------|------|-------|-------|

|                 |                          |      |      |       |       |
|-----------------|--------------------------|------|------|-------|-------|
| N21---H20...N12 | [1_555_02 ---> 1_455_01] | 1.03 | 2.62 | 3.333 | 126.5 |
|-----------------|--------------------------|------|------|-------|-------|

|                 |                          |      |      |       |       |
|-----------------|--------------------------|------|------|-------|-------|
| N21---H21...O11 | [1_555_02 ---> 2_666_01] | 1.03 | 1.97 | 2.978 | 164.3 |
|-----------------|--------------------------|------|------|-------|-------|

#### 94\_SLFZ

8.4105 31.6737 11.6376 90.000 95.105 90.000 V = 3087.86

Space group: P21/n

Symmetry operators read from CIF:

[1] x,y,z

[2] -x+0.50,y+0.50,-z+0.50

[3] -x,-y,-z

[4] x+0.50,-y+0.50,z+0.50

Z(prime) = 2

Molecule 01 = C9 H9 N3 O2 S2

Centroid = 0.3916 0.3956 0.9306

Molecule 02 = C9 H9 N3 O2 S2

Centroid = 1.0047 0.3005 0.3354

#### INTERMOLECULAR HYDROGEN BONDS

| D---H...A | ARU1 | ARU2 | D-H | H...A | D...A | D-H...A |
|-----------|------|------|-----|-------|-------|---------|
|-----------|------|------|-----|-------|-------|---------|

### S3. Geometrical parameters of hydrogen bonds between SLFZ molecules

```
N11---H10...O21 [1_555_01 ---> 1_555_02] 1.03 1.89 2.898 165.4
N11---H11...O12 [1_555_01 ---> 1_655_01] 1.03 1.92 2.918 164.7
N21---H20...O21 [1_555_02 ---> 4_554_02] 1.03 1.97 2.980 166.7
N21---H21...O22 [1_555_02 ---> 1_655_02] 1.03 1.91 2.917 164.8
```

#### 95\_SLFZ

```
10.6023 8.1642 35.1366 90.000 90.000 90.000 V = 3041.40
```

Space group: Pbca

Symmetry operators read from CIF:

```
[1] x,y,z
[2] -x+0.50,-y,z+0.50
[3] -x,y+0.50,-z+0.50
[4] x+0.50,-y+0.50,-z
[5] -x,-y,-z
[6] x+0.50,y,-z+0.50
[7] x,-y+0.50,z+0.50
[8] -x+0.50,y+0.50,z
```

Z(prime) = 1

Molecule 01 = C9 H9 N3 O2 S2

Centroid = 0.6045 0.4041 0.5889

#### INTERMOLECULAR HYDROGEN BONDS

```
D---H...A ARU1 ARU2 D-H H...A D...A D-H...A
```

```
N11---H11...O12 [1_555_01 ---> 1_545_01] 1.03 1.98 2.962 158.2
N13---H17...O11 [1_555_01 ---> 5_666_01] 1.06 2.62 3.324 123.2
N13---H17...N12 [1_555_01 ---> 5_666_01] 1.06 1.77 2.822 173.0
```

#### 96\_SLFZ

```
7.6295 8.7769 11.3046 101.353 92.999 97.446 V = 733.56
```

Space group: P-1

Symmetry operators read from CIF:

```
[1] x,y,z
[2] -x,-y,-z
```

Z(prime) = 1

Molecule 01 = C9 H8 N3 O2 S2

Centroid = 0.7521 0.7747 0.9334

#### INTERMOLECULAR HYDROGEN BONDS

```
D---H...A ARU1 ARU2 D-H H...A D...A D-H...A
```

```
N11---H10...O11 [1_555_01 ---> 2_767_01] 1.03 2.24 3.158 148.7
N11---H11...N13 [1_555_01 ---> 2_777_01] 1.04 1.94 2.974 169.3
```



#### S4. Hydrogen-bond connectivity tables for SLFZ molecules

- **Neutral [SLFZ]:** Hn0, Hn1, Hn7 available as donors, On1, On2, Nn1, Nn2 available as acceptors.
- **Cation [SLFZ]<sup>+</sup>:** Hn0, Hn1, HnX, Hn7 available as donors, On1, On2, Nn2 available as acceptors.
- **Anion [SLFZ]<sup>-</sup>:** Hn0, Hn1 available as donors, On1, On2, Nn1, Nn2, Nn3 available as acceptors.
- Symbols + and – indicate connections between molecules of the same or opposite handedness, respectively.

| 1p  | O11 | O12 | N11 | N12 | O21 | O22 | N21 | N22 |
|-----|-----|-----|-----|-----|-----|-----|-----|-----|
| H10 | +   |     |     |     |     |     |     |     |
| H11 |     | –   |     |     |     |     |     |     |
| H17 | –   |     |     | –   |     |     |     |     |
| H20 |     |     | +   |     |     |     |     |     |
| H21 |     |     |     |     | +   |     |     |     |
| H27 |     |     |     |     |     |     |     | –   |

| 2p  | O11 | O12 | N11 | N12 | O21 | O22 | N21 | N22 |
|-----|-----|-----|-----|-----|-----|-----|-----|-----|
| H10 |     |     |     |     |     | –   |     |     |
| H11 | +   |     |     | +   |     |     |     |     |
| H17 |     |     |     |     | –   |     |     |     |
| H20 |     | –   |     |     |     |     |     |     |
| H21 |     |     |     |     | +   |     |     | +   |
| H27 | –   |     |     |     |     |     |     |     |

| 3p  | O11 | O12 | N11 | N12 | O21 | O22 | N21 | N22 |
|-----|-----|-----|-----|-----|-----|-----|-----|-----|
| H10 |     |     |     |     |     |     |     | –   |
| H11 |     |     |     |     | +   |     |     |     |
| H17 |     |     |     |     |     |     | +   |     |
| H20 | +   |     |     |     |     |     |     |     |
| H21 | +   |     |     |     |     |     |     |     |
| H27 |     |     | +   |     |     |     |     |     |

| 4p  | O11 | O12 | N11 | N12 |
|-----|-----|-----|-----|-----|
| H10 | +   |     |     |     |
| H11 | +   |     |     |     |
| H17 |     |     | +   |     |

| 5p  | O11 | O12 | N11 | N12 |
|-----|-----|-----|-----|-----|
| H10 |     |     |     | –   |
| H11 | +   | –   |     |     |
| H17 |     |     | +   |     |

| 1 [SLFZ] | O11 | O12 | N11 | N12 | O21 | O22 | N21 | N22 |
|----------|-----|-----|-----|-----|-----|-----|-----|-----|
| H10      |     |     |     |     | +   | –   |     |     |
| H11      |     |     |     |     | –   |     |     | –   |
| H17      | –   |     |     | –   |     |     |     |     |
| H20      |     |     |     |     |     |     |     |     |
| H21      |     |     | +   |     |     |     |     |     |
| H27      |     | –   |     |     |     |     |     |     |

| 2 [SLFZ] | O11 | O12 | N11 | N12 |
|----------|-----|-----|-----|-----|
| H10      |     |     |     | +   |
| H11      |     | +   |     |     |
| H17      |     |     |     |     |

| 3 [SLFZ] | O11 | O12 | N11 | N12 | O21 | O22 | N21 | N22 |
|----------|-----|-----|-----|-----|-----|-----|-----|-----|
| H10      | +   |     |     |     |     |     |     |     |
| H11      |     | –   |     |     |     |     |     |     |
| H17      |     |     |     |     |     |     |     | +   |
| H20      |     |     |     |     | –   |     |     |     |
| H21      |     |     |     |     | –   | +   |     |     |
| H27      |     |     |     | +   |     |     |     |     |

| 4 [SLFZ] | O11 | O12 | N11 | N12 | O21 | O22 | N21 | N22 |
|----------|-----|-----|-----|-----|-----|-----|-----|-----|
| H10      |     |     |     |     |     | –   |     |     |
| H11      |     |     |     |     | +   |     |     |     |
| H17      |     |     |     |     |     |     |     | +   |
| H20      |     | +   |     |     |     |     |     |     |
| H21      | –   |     |     |     |     |     |     |     |
| H27      |     |     |     | +   |     |     |     |     |

| 5 [SLFZ] | O11 | O12 | N11 | N12 |
|----------|-----|-----|-----|-----|
| H10      | +   |     |     |     |
| H11      |     |     |     |     |
| H17      |     |     |     | –   |

#### S4. Hydrogen-bond connectivity tables for SLFZ molecules

- **Neutral [SLFZ]:**  $Hn0$ ,  $Hn1$ ,  $Hn7$  available as donors,  $On1$ ,  $On2$ ,  $Nn1$ ,  $Nn2$  available as acceptors.
- **Cation [SLFZ]<sup>+</sup>:**  $Hn0$ ,  $Hn1$ ,  $HnX$ ,  $Hn7$  available as donors,  $On1$ ,  $On2$ ,  $Nn2$  available as acceptors.
- **Anion [SLFZ]<sup>-</sup>:**  $Hn0$ ,  $Hn1$  available as donors,  $On1$ ,  $On2$ ,  $Nn1$ ,  $Nn2$ ,  $Nn3$  available as acceptors.
- Symbols + and – indicate connections between molecules of the same or opposite handedness, respectively.

| 6 [SLFZ] | O11 | O12 | N11 | N12 |
|----------|-----|-----|-----|-----|
| H10      |     | –   |     |     |
| H11      | –   | +   |     |     |
| H17      | –   |     |     | –   |

| 7 [SLFZ] | O11 | O12 | N11 | N12 |
|----------|-----|-----|-----|-----|
| H10      |     |     |     |     |
| H11      |     | +   |     |     |
| H17      |     |     |     | –   |

| 8 [SLFZ] | O11 | O12 | N11 | N12 |
|----------|-----|-----|-----|-----|
| H10      | –   |     |     |     |
| H11      |     | +   |     |     |
| H17      |     |     |     | –   |

| 9 [SLFZ] | O11 | O12 | N11 | N12 |
|----------|-----|-----|-----|-----|
| H10      |     | +   |     |     |
| H11      |     |     |     |     |
| H17      |     |     |     | –   |

| 10 [SLFZ] | O11 | O12 | N11 | N12 |
|-----------|-----|-----|-----|-----|
| H10       | –   |     |     | –   |
| H11       | –   | –   |     |     |
| H17       |     | +   |     |     |

| 11 [SLFZ] | O11 | O12 | N11 | N12 |
|-----------|-----|-----|-----|-----|
| H10       | –   |     |     |     |
| H11       |     | +   |     |     |
| H17       | –   |     |     | –   |

| 12 [SLFZ] | O11 | O12 | N11 | N12 |
|-----------|-----|-----|-----|-----|
| H10       | –   |     |     |     |
| H11       |     | +   |     |     |
| H17       | –   |     |     | –   |

| 13 [SLFZ] | O11 | O12 | N11 | N12 |
|-----------|-----|-----|-----|-----|
| H10       | –   |     |     |     |
| H11       |     | +   |     |     |
| H17       | –   |     |     | –   |

| 14 [SLFZ] | O11 | O12 | N11 | N12 |
|-----------|-----|-----|-----|-----|
| H10       | –   |     |     |     |
| H11       |     | +   |     |     |
| H17       | –   |     |     | –   |

| 15 [SLFZ] | O11 | O12 | N11 | N12 |
|-----------|-----|-----|-----|-----|
| H10       | –   |     |     |     |
| H11       |     | +   |     |     |
| H17       |     |     |     | –   |

| 16 [SLFZ] | O11 | O12 | N11 | N12 |
|-----------|-----|-----|-----|-----|
| H10       |     | +   |     |     |
| H11       | +   |     |     |     |
| H17       |     |     |     | –   |

| 17 [SLFZ] | O11 | O12 | N11 | N12 |
|-----------|-----|-----|-----|-----|
| H10       |     | +   |     |     |
| H11       | +   |     |     |     |
| H17       |     |     |     | –   |

| 18 [SLFZ] | O11 | O12 | N11 | N12 |
|-----------|-----|-----|-----|-----|
| H10       | –   |     |     |     |
| H11       |     | +   |     |     |
| H17       | –   |     |     | –   |

| 19 [SLFZ] | O11 | O12 | N11 | N12 |
|-----------|-----|-----|-----|-----|
| H10       |     | +   |     |     |
| H11       | +   |     |     |     |
| H17       |     |     |     | –   |

## S4. Hydrogen-bond connectivity tables for SLFZ molecules

- **Neutral [SLFZ]:**  $Hn0$ ,  $Hn1$ ,  $Hn7$  available as donors,  $On1$ ,  $On2$ ,  $Nn1$ ,  $Nn2$  available as acceptors.
- **Cation [SLFZ]<sup>+</sup>:**  $Hn0$ ,  $Hn1$ ,  $HnX$ ,  $Hn7$  available as donors,  $On1$ ,  $On2$ ,  $Nn2$  available as acceptors.
- **Anion [SLFZ]<sup>-</sup>:**  $Hn0$ ,  $Hn1$  available as donors,  $On1$ ,  $On2$ ,  $Nn1$ ,  $Nn2$ ,  $Nn3$  available as acceptors.
- Symbols + and – indicate connections between molecules of the same or opposite handedness, respectively.

| 20 [SLFZ] | O11 | O12 | N11 | N12 | O21 | O22 | N21 | N22 |
|-----------|-----|-----|-----|-----|-----|-----|-----|-----|
| H10       |     |     |     |     | –   |     |     |     |
| H11       |     | +   |     |     |     |     |     |     |
| H17       | –   |     |     | –   |     |     |     |     |
| H20       |     |     | –   |     |     |     |     |     |
| H21       |     |     |     |     |     | +   |     |     |
| H27       | +   |     |     |     |     |     |     |     |

| 25 [SLFZ] | O11 | O12 | N11 | N12 | O21 | O22 | N21 | N22 |
|-----------|-----|-----|-----|-----|-----|-----|-----|-----|
| H10       |     | +   |     |     |     |     |     |     |
| H11       |     |     |     |     | –   |     |     |     |
| H17       |     |     |     |     | –   |     |     | –   |
| H20       |     |     |     |     |     | +   |     |     |
| H21       | –   |     |     |     |     |     |     |     |
| H27       |     |     |     |     | –   |     |     |     |

| 21 [SLFZ] | O11 | O12 | N11 | N12 |
|-----------|-----|-----|-----|-----|
| H10       | –   |     |     |     |
| H11       |     | +   |     |     |
| H17       | –   |     |     | –   |

| 26 [SLFZ] | O11 | O12 | N11 | N12 |
|-----------|-----|-----|-----|-----|
| H10       |     |     |     |     |
| H11       |     |     |     |     |
| H17       |     |     |     | +   |

| 22 [SLFZ] | O11 | O12 | N11 | N12 |
|-----------|-----|-----|-----|-----|
| H10       | –   |     |     |     |
| H11       |     | +   |     |     |
| H17       | –   |     |     | –   |

| 27 [SLFZ] | O11 | O12 | N11 | N12 |
|-----------|-----|-----|-----|-----|
| H10       |     |     |     |     |
| H11       |     |     |     |     |
| H17       |     |     |     | –   |

| 23 [SLFZ] | O11 | O12 | N11 | N12 | O21 | O22 | N21 | N22 |
|-----------|-----|-----|-----|-----|-----|-----|-----|-----|
| H10       |     |     |     |     | –   |     |     |     |
| H11       |     | +   |     |     |     |     |     |     |
| H17       | –   |     |     | –   |     |     |     |     |
| H20       | –   |     |     |     |     |     |     |     |
| H21       |     |     |     |     |     | +   |     |     |
| H27       |     |     |     |     |     |     |     |     |

| 28 [SLFZ] | O11 | O12 | N11 | N12 |
|-----------|-----|-----|-----|-----|
| H10       | –   |     |     |     |
| H11       |     | +   |     |     |
| H17       | –   |     |     | –   |

| 24 [SLFZ] | O11 | O12 | N11 | N12 |
|-----------|-----|-----|-----|-----|
| H10       |     |     |     |     |
| H11       | –   |     |     |     |
| H17       |     |     |     | –   |

| 29 [SLFZ] | O11 | O12 | N11 | N12 |
|-----------|-----|-----|-----|-----|
| H10       | –   |     |     |     |
| H11       |     | +   |     |     |
| H17       | –   |     |     | –   |

| 30 [SLFZ] | O11 | O12 | N11 | N12 |
|-----------|-----|-----|-----|-----|
| H10       | –   |     |     |     |
| H11       |     | +   |     |     |
| H17       | –   |     |     | –   |

#### S4. Hydrogen-bond connectivity tables for SLFZ molecules

- **Neutral [SLFZ]:** Hn0, Hn1, Hn7 available as donors, On1, On2, Nn1, Nn2 available as acceptors.
- **Cation [SLFZ]<sup>+</sup>:** Hn0, Hn1, HnX, Hn7 available as donors, On1, On2, Nn2 available as acceptors.
- **Anion [SLFZ]<sup>-</sup>:** Hn0, Hn1 available as donors, On1, On2, Nn1, Nn2, Nn3 available as acceptors.
- Symbols + and – indicate connections between molecules of the same or opposite handedness, respectively.

| 31 [SLFZ] | O11 | O12 | N11 | N12 |
|-----------|-----|-----|-----|-----|
| H10       | –   |     |     |     |
| H11       |     | +   |     |     |
| H17       | –   |     |     | –   |

| 32 [SLFZ] | O11 | O12 | N11 | N12 |
|-----------|-----|-----|-----|-----|
| H10       | –   |     |     |     |
| H11       |     | +   |     |     |
| H17       | –   |     |     | –   |

| 33 [SLFZ] | O11 | O12 | N11 | N12 |
|-----------|-----|-----|-----|-----|
| H10       | –   |     |     |     |
| H11       |     | +   |     |     |
| H17       |     |     |     | –   |

| 34 [SLFZ] | O11 | O12 | N11 | N12 |
|-----------|-----|-----|-----|-----|
| H10       | –   |     |     |     |
| H11       |     | +   |     |     |
| H17       |     |     |     | –   |

| 35 [SLFZ] | O11 | O12 | N11 | N12 | O21 | O22 | N21 | N22 |
|-----------|-----|-----|-----|-----|-----|-----|-----|-----|
| H10       |     |     |     |     | –   |     |     |     |
| H11       |     | +   |     |     |     |     |     |     |
| H17       |     |     |     |     | –   |     |     | –   |
| H20       | –   |     |     |     |     |     |     |     |
| H21       |     |     |     |     |     | +   |     |     |
| H27       | –   |     |     | –   |     |     |     |     |

| 36 [SLFZ] | O11 | O12 | N11 | N12 |
|-----------|-----|-----|-----|-----|
| H10       | +   | –   |     |     |
| H11       |     |     |     |     |
| H17       | –   |     |     | –   |

| 37 [SLFZ] | O11 | O12 | N11 | N12 |
|-----------|-----|-----|-----|-----|
| H10       |     |     |     |     |
| H11       |     | +   |     |     |
| H17       | –   |     |     | –   |

| 38 [SLFZ] | O11 | O12 | N11 | N12 |
|-----------|-----|-----|-----|-----|
| H10       | +   |     |     |     |
| H11       |     |     |     |     |
| H17       |     |     |     | –   |

| 39 [SLFZ] | O11 | O12 | N11 | N12 | O21 | O22 | N21 | N22 |
|-----------|-----|-----|-----|-----|-----|-----|-----|-----|
| H10       |     | +   |     |     |     |     |     |     |
| H11       | –   |     |     |     |     |     |     |     |
| H17       |     |     |     |     | +   |     |     | +   |
| H20       |     |     |     |     | +   |     |     |     |
| H21       |     |     |     |     |     | –   |     |     |
| H27       | +   |     |     | +   |     |     |     |     |

| 40 [SLFZ] | O11 | O12 | N11 | N12 | O21 | O22 | N21 | N22 |
|-----------|-----|-----|-----|-----|-----|-----|-----|-----|
| H10       |     | +   |     |     |     |     |     |     |
| H11       | –   |     |     |     |     |     |     |     |
| H17       |     |     |     |     |     |     |     | +   |
| H20       |     |     |     |     | +   |     |     |     |
| H21       |     |     |     |     |     | –   |     |     |
| H27       | +   |     |     | +   |     |     |     |     |

| 41 [SLFZ] | O11 | O12 | N11 | N12 | O21 | O22 | N21 | N22 |
|-----------|-----|-----|-----|-----|-----|-----|-----|-----|
| H10       |     |     |     |     | –   |     |     |     |
| H11       |     |     |     |     |     | +   |     |     |
| H17       | –   |     |     | –   |     |     |     |     |
| H20       | –   |     |     |     |     |     |     |     |
| H21       |     | +   |     |     |     |     |     |     |
| H27       |     |     |     |     | –   |     |     | –   |

#### S4. Hydrogen-bond connectivity tables for SLFZ molecules

- **Neutral [SLFZ]:** Hn0, Hn1, Hn7 available as donors, On1, On2, Nn1, Nn2 available as acceptors.
- **Cation [SLFZ]<sup>+</sup>:** Hn0, Hn1, HnX, Hn7 available as donors, On1, On2, Nn2 available as acceptors.
- **Anion [SLFZ]<sup>-</sup>:** Hn0, Hn1 available as donors, On1, On2, Nn1, Nn2, Nn3 available as acceptors.
- Symbols + and – indicate connections between molecules of the same or opposite handedness, respectively.

| 42 [SLFZ] | O11 | O12 | N11 | N12 |
|-----------|-----|-----|-----|-----|
| H10       | +   |     |     |     |
| H11       | +   |     |     |     |
| H17       |     |     |     |     |

| 43 [SLFZ] | O11 | O12 | N11 | N12 |
|-----------|-----|-----|-----|-----|
| H10       | +   |     |     |     |
| H11       |     | +   |     |     |
| H17       |     |     |     |     |

| 44 [SLFZ] | O11 | O12 | N11 | N12 |
|-----------|-----|-----|-----|-----|
| H10       |     | +   |     |     |
| H11       |     | -   |     |     |
| H17       | -   |     |     | -   |

| 45 [SLFZ] | O11 | O12 | N11 | N12 | O21 | O22 | N21 | N22 |
|-----------|-----|-----|-----|-----|-----|-----|-----|-----|
| H10       |     |     |     |     |     |     |     |     |
| H11       |     |     |     |     |     |     |     |     |
| H17       |     |     |     |     |     |     |     | +   |
| H20       |     |     |     |     |     |     |     |     |
| H21       |     |     |     |     |     |     |     |     |
| H27       | +   |     |     | +   |     |     |     |     |

| 46 [SLFZ] | O11 | O12 | N11 | N12 |
|-----------|-----|-----|-----|-----|
| H10       |     | +   |     |     |
| H11       | +   |     |     |     |
| H17       |     |     |     | -   |

| 47 [SLFZ] | O11 | O12 | N11 | N12 |
|-----------|-----|-----|-----|-----|
| H10       |     | +   |     |     |
| H11       | -   |     |     |     |
| H17       |     |     |     | -   |

| 48 [SLFZ] | O11 | O12 | N11 | N12 |
|-----------|-----|-----|-----|-----|
| H10       | +   |     |     | +   |
| H11       | -   |     |     |     |
| H17       |     |     |     |     |

| 49 [SLFZ] | O11 | O12 | N11 | N12 |
|-----------|-----|-----|-----|-----|
| H10       |     | -   |     |     |
| H11       |     | +   |     |     |
| H17       |     |     |     |     |

| 50 [SLFZ] | O11 | O12 | N11 | N12 |
|-----------|-----|-----|-----|-----|
| H10       | +   |     |     |     |
| H11       |     | +   |     |     |
| H17       |     |     |     | -   |

| 51 [SLFZ] | O11 | O12 | N11 | N12 |
|-----------|-----|-----|-----|-----|
| H10       |     |     |     |     |
| H11       | +   |     |     |     |
| H17       |     |     |     |     |

| 52 [SLFZ] | O11 | O12 | N11 | N12 |
|-----------|-----|-----|-----|-----|
| H10       | +   |     |     |     |
| H11       |     |     |     |     |
| H17       |     |     |     | -   |

| 53 [SLFZ] | O11 | O12 | N11 | N12 |
|-----------|-----|-----|-----|-----|
| H10       |     |     |     |     |
| H11       |     |     |     |     |
| H17       |     |     |     | -   |

| 54 [SLFZ] | O11 | O12 | N11 | N12 |
|-----------|-----|-----|-----|-----|
| H10       |     |     |     |     |
| H11       |     |     |     |     |
| H17       |     |     |     | -   |

## S4. Hydrogen-bond connectivity tables for SLFZ molecules

- **Neutral [SLFZ]:**  $Hn0$ ,  $Hn1$ ,  $Hn7$  available as donors,  $On1$ ,  $On2$ ,  $Nn1$ ,  $Nn2$  available as acceptors.
- **Cation [SLFZ]<sup>+</sup>:**  $Hn0$ ,  $Hn1$ ,  $HnX$ ,  $Hn7$  available as donors,  $On1$ ,  $On2$ ,  $Nn2$  available as acceptors.
- **Anion [SLFZ]<sup>-</sup>:**  $Hn0$ ,  $Hn1$  available as donors,  $On1$ ,  $On2$ ,  $Nn1$ ,  $Nn2$ ,  $Nn3$  available as acceptors.
- Symbols + and – indicate connections between molecules of the same or opposite handedness, respectively.

| 55 [SLFZ] | O11 | O12 | N11 | N12 |
|-----------|-----|-----|-----|-----|
| H10       |     |     |     |     |
| H11       |     |     |     |     |
| H17       |     |     |     |     |

| 56 [SLFZ] | O11 | O12 | N11 | N12 |
|-----------|-----|-----|-----|-----|
| H10       | +   |     |     |     |
| H11       |     | -   |     |     |
| H17       |     |     |     |     |

| 57 [SLFZ] | O11 | O12 | N11 | N12 |
|-----------|-----|-----|-----|-----|
| H10       | +   |     |     |     |
| H11       |     | -   |     |     |
| H17       |     |     |     |     |

| 58 [SLFZ] | O11 | O12 | N11 | N12 |
|-----------|-----|-----|-----|-----|
| H10       | +   |     |     |     |
| H11       |     | -   |     |     |
| H17       |     |     |     |     |

| 59 [SLFZ] | O11 | O12 | N11 | N12 |
|-----------|-----|-----|-----|-----|
| H10       | +   |     |     |     |
| H11       |     | -   |     |     |
| H17       |     |     |     |     |

| 60 [SLFZ] <sup>-</sup> | O11 | O12 | N11 | N12 | N13 |
|------------------------|-----|-----|-----|-----|-----|
| H10                    |     | -   |     |     |     |
| H11                    | +   |     |     | +   |     |

| 61 [SLFZ] <sup>-</sup> | O11 | O12 | N11 | N12 | N13 |
|------------------------|-----|-----|-----|-----|-----|
| H10                    |     |     |     | +   |     |
| H11                    | -   |     |     |     |     |

| 62 [SLFZ] <sup>-</sup> | O11 | O12 | N11 | N12 | N13 |
|------------------------|-----|-----|-----|-----|-----|
| H10                    |     | +   |     |     |     |
| H11                    | +   |     |     | +   |     |

| 63 [SLFZ] <sup>-</sup> | O11 | O12 | N11 | N12 | N13 |
|------------------------|-----|-----|-----|-----|-----|
| H10                    |     | +   |     |     |     |
| H11                    | +   |     |     | +   |     |

| 64 [SLFZ] <sup>-</sup> | O11 | O12 | N11 | N12 | N13 |
|------------------------|-----|-----|-----|-----|-----|
| H10                    | +   |     |     |     |     |
| H11                    | -   |     |     |     |     |

| 65 [SLFZ] <sup>-</sup> | O11 | O12 | N11 | N12 | N13 | O21 | O22 | N21 | N22 | N23 |
|------------------------|-----|-----|-----|-----|-----|-----|-----|-----|-----|-----|
| H10                    |     | +   |     |     |     |     |     |     |     |     |
| H11                    |     |     |     |     |     | +   |     |     |     |     |
| H20                    |     |     |     |     |     |     | +   |     |     |     |
| H21                    | +   |     |     |     |     |     |     |     |     |     |

| 66 [SLFZ] <sup>-</sup> | O11 | O12 | N11 | N12 | N13 |
|------------------------|-----|-----|-----|-----|-----|
| H10                    | -   |     |     |     |     |
| H11                    |     |     |     |     | +   |

| 67 [SLFZ] <sup>-</sup> | O11 | O12 | N11 | N12 | N13 | O21 | O22 | N21 | N22 | N23 |
|------------------------|-----|-----|-----|-----|-----|-----|-----|-----|-----|-----|
| H10                    | +   |     |     |     |     |     |     |     |     |     |
| H11                    |     |     |     |     |     |     | -   |     |     |     |
| H20                    |     |     |     |     |     | +   |     |     |     |     |
| H21                    | +   |     |     |     |     |     |     |     |     |     |

| 68 [SLFZ] <sup>-</sup> | O11 | O12 | N11 | N12 | N13 |
|------------------------|-----|-----|-----|-----|-----|
| H10                    | -   |     |     |     |     |
| H11                    |     |     |     |     | -   |

#### S4. Hydrogen-bond connectivity tables for SLFZ molecules

- **Neutral [SLFZ]**:  $Hn0$ ,  $Hn1$ ,  $Hn7$  available as donors,  $On1$ ,  $On2$ ,  $Nn1$ ,  $Nn2$  available as acceptors.
- **Cation [SLFZ]<sup>+</sup>**:  $Hn0$ ,  $Hn1$ ,  $HnX$ ,  $Hn7$  available as donors,  $On1$ ,  $On2$ ,  $Nn2$  available as acceptors.
- **Anion [SLFZ]<sup>-</sup>**:  $Hn0$ ,  $Hn1$  available as donors,  $On1$ ,  $On2$ ,  $Nn1$ ,  $Nn2$ ,  $Nn3$  available as acceptors.
- Symbols + and – indicate connections between molecules of the same or opposite handedness, respectively.

| 69 [SLFZ] <sup>-</sup> | O11 | O12 | N11 | N12 | N13 |
|------------------------|-----|-----|-----|-----|-----|
| H10                    | +   |     |     |     |     |
| H11                    |     | +   |     |     |     |

| 70 [SLFZ] <sup>-</sup> | O11 | O12 | N11 | N12 | N13 |
|------------------------|-----|-----|-----|-----|-----|
| H10                    |     |     | -   |     |     |
| H11                    |     | +   |     |     |     |

| 71 [SLFZ] <sup>+</sup> | O11 | O12 | N12 |
|------------------------|-----|-----|-----|
| H10                    |     |     |     |
| H11                    |     |     | -   |
| H1X                    |     |     |     |
| H17                    |     |     |     |

| 72 [SLFZ] <sup>-</sup> | O11 | O12 | N11 | N12 | N13 |
|------------------------|-----|-----|-----|-----|-----|
| H10                    |     | +   |     |     |     |
| H11                    | +   |     |     |     |     |

| 73 [SLFZ] <sup>-</sup> | O11 | O12 | N11 | N12 | N13 |
|------------------------|-----|-----|-----|-----|-----|
| H10                    | +   |     |     |     |     |
| H11                    | +   | +   |     |     |     |

| 74 [SLFZ] <sup>-</sup> | O11 | O12 | N11 | N12 | N13 |
|------------------------|-----|-----|-----|-----|-----|
| H10                    |     |     |     |     |     |
| H11                    |     |     |     |     |     |

| 75 [SLFZ] <sup>+</sup> | O11 | O12 | N12 |
|------------------------|-----|-----|-----|
| H1X                    |     |     |     |
| H10                    |     |     | +   |
| H11                    | -   |     |     |
| H17                    |     |     |     |

| 76 [SLFZ] <sup>+</sup> | O11 | O12 | N12 |
|------------------------|-----|-----|-----|
| H1X                    |     |     |     |
| H10                    |     |     |     |
| H11                    |     |     |     |
| H17                    |     | -   |     |

| 77 [SLFZ] <sup>-</sup> | O11 | O12 | N11 | N12 | N13 |
|------------------------|-----|-----|-----|-----|-----|
| H10                    |     |     |     |     |     |
| H11                    |     |     |     |     | -   |

| 78 [SLFZ] <sup>-</sup> | O11 | O12 | N11 | N12 | N13 |
|------------------------|-----|-----|-----|-----|-----|
| H10                    | +   |     |     |     |     |
| H11                    |     |     |     | -   |     |

| 79 [SLFZ] <sup>-</sup> | O11 | O12 | N11 | N12 | N13 |
|------------------------|-----|-----|-----|-----|-----|
| H10                    |     |     |     |     |     |
| H11                    |     |     |     |     | -   |

| 80 [SLFZ] <sup>-</sup> | O11 | O12 | N11 | N12 | N13 | O21 | O22 | N21 | N22 | N23 |
|------------------------|-----|-----|-----|-----|-----|-----|-----|-----|-----|-----|
| H10                    |     |     |     |     |     |     |     |     |     |     |
| H11                    |     |     |     |     |     |     | +   |     |     |     |
| H20                    | -   | -   |     |     |     |     |     |     |     |     |
| H21                    |     | +   |     |     |     |     |     |     |     |     |

| 81 [SLFZ] <sup>+</sup> | O11 | O12 | N12 |
|------------------------|-----|-----|-----|
| H1X                    |     |     |     |
| H10                    |     |     |     |
| H11                    | -   |     | -   |
| H17                    |     |     |     |

| 82 [SLFZ] <sup>-</sup> | O11 | O12 | N11 | N12 | N13 |
|------------------------|-----|-----|-----|-----|-----|
| H10                    | +   |     |     |     |     |
| H11                    | -   |     |     |     |     |

## S4. Hydrogen-bond connectivity tables for SLFZ molecules

- **Neutral [SLFZ]:** Hn0, Hn1, Hn7 available as donors, On1, On2, Nn1, Nn2 available as acceptors.
- **Cation [SLFZ]<sup>+</sup>:** Hn0, Hn1, HnX, Hn7 available as donors, On1, On2, Nn2 available as acceptors.
- **Anion [SLFZ]<sup>-</sup>:** Hn0, Hn1 available as donors, On1, On2, Nn1, Nn2, Nn3 available as acceptors.
- Symbols + and – indicate connections between molecules of the same or opposite handedness, respectively.

| 83 [SLFZ] <sup>+</sup> | O11 | O12 | N12 | O21 | O22 | N22 |
|------------------------|-----|-----|-----|-----|-----|-----|
| H1X                    |     |     |     |     |     |     |
| H10                    | +   |     | +   | +   |     |     |
| H11                    |     |     |     |     |     |     |
| H17                    |     |     |     |     |     |     |
| H2X                    |     |     |     |     |     |     |
| H20                    |     |     |     | +   |     | +   |
| H21                    |     |     |     |     |     |     |
| H27                    |     |     |     |     |     |     |

| 84 [SLFZ] <sup>+</sup> | O11 | O12 | N12 |
|------------------------|-----|-----|-----|
| H10                    | +   |     | +   |
| H11                    |     | +   |     |
| H1X                    |     |     |     |
| H17                    |     |     |     |

| 85 [SLFZ] <sup>+</sup> | O11 | O12 | N12 | O21 | O22 | N22 |
|------------------------|-----|-----|-----|-----|-----|-----|
| H1X                    |     |     |     |     |     |     |
| H10                    |     |     |     |     |     |     |
| H11                    |     |     |     | -   |     | -   |
| H17                    |     |     |     |     |     |     |
| H2X                    |     |     |     |     |     |     |
| H20                    |     |     |     |     |     |     |
| H21                    | -   |     | -   |     |     |     |
| H27                    |     |     |     |     |     |     |

| 86 [SLFZ] <sup>+</sup> | O11 | O12 | N12 | O22 | O21 | N22 |
|------------------------|-----|-----|-----|-----|-----|-----|
| H1X                    |     |     |     |     |     |     |
| H10                    | +   |     | +   |     |     |     |
| H11                    |     |     |     |     |     |     |
| H17                    |     |     |     |     |     |     |
| H2X                    |     |     |     |     |     |     |
| H20                    |     |     |     |     | +   | +   |
| H21                    |     |     |     |     |     |     |
| H27                    |     |     |     |     |     |     |

| 87 [SLFZ] <sup>+</sup> | O11 | O12 | N12 |
|------------------------|-----|-----|-----|
| H10                    |     |     |     |
| H11                    |     |     | -   |
| H1X                    |     |     |     |
| H17                    |     |     |     |

| 88 [SLFZ] <sup>-</sup> | O11 | O12 | N11 | N12 | N13 |
|------------------------|-----|-----|-----|-----|-----|
| H10                    | +   |     |     |     |     |
| H11                    |     | +   |     |     |     |

| [SLFZ] <sup>-</sup> / [SLFZ] <sup>-</sup> | 89  |     |     |     |     |     |     |     |     |     |     |     |     |     |     |     |     |     |   |
|-------------------------------------------|-----|-----|-----|-----|-----|-----|-----|-----|-----|-----|-----|-----|-----|-----|-----|-----|-----|-----|---|
|                                           | O11 | O12 | N11 | N12 | O21 | O22 | N21 | N22 | O31 | O32 | N31 | N32 | N33 | O41 | O42 | N41 | N42 | N43 |   |
| H10                                       | +   |     |     | +   |     |     |     |     |     |     |     |     |     |     |     |     |     |     |   |
| H11                                       |     |     |     |     | +   |     |     |     |     |     |     |     |     |     |     |     |     |     |   |
| H17                                       |     |     |     |     |     |     |     |     |     |     |     |     |     |     |     |     |     |     | + |
| H20                                       |     |     |     |     | +   |     |     | +   |     |     |     |     |     |     |     |     |     |     |   |
| H21                                       | +   |     |     |     |     |     |     |     |     |     |     |     |     |     |     |     |     |     |   |
| H27                                       |     |     |     |     |     |     |     |     |     |     |     |     | +   |     |     |     |     |     |   |
| H30                                       |     |     |     |     |     |     |     |     | +   |     |     |     |     |     |     |     |     |     |   |
| H31                                       |     |     |     |     |     |     |     |     |     |     |     |     |     |     |     | +   |     |     |   |
| H40                                       |     |     |     |     |     |     |     |     |     |     |     |     |     | +   |     |     |     |     |   |
| H41                                       |     |     |     |     |     |     |     |     |     | +   |     |     |     |     |     |     |     |     |   |

| 90 [SLFZ] <sup>+</sup> | O11 | O12 | N12 |
|------------------------|-----|-----|-----|
| H1X                    |     |     |     |
| H10                    | +   |     | +   |
| H11                    | -   |     |     |
| H17                    |     |     |     |



#### S4. Hydrogen-bond connectivity tables for SLFZ molecules

- **Neutral [SLFZ]:** Hn0, Hn1, Hn7 available as donors, On1, On2, Nn1, Nn2 available as acceptors.
- **Cation [SLFZ]<sup>+</sup>:** Hn0, Hn1, HnX, Hn7 available as donors, On1, On2, Nn2 available as acceptors.
- **Anion [SLFZ]<sup>-</sup>:** Hn0, Hn1 available as donors, On1, On2, Nn1, Nn2, Nn3 available as acceptors.
- Symbols + and – indicate connections between molecules of the same or opposite handedness, respectively.

| 91 [SLFZ] | O11 | O12 | N11 | N12 | N13 |
|-----------|-----|-----|-----|-----|-----|
| H10       |     |     |     |     |     |
| H11       |     |     |     |     |     |
| H17       |     |     |     |     |     |

| 92 [SLFZ] | O11 | O12 | N11 | N12 |
|-----------|-----|-----|-----|-----|
| H10       | +   |     |     |     |
| H11       | -   |     |     |     |
| H17       |     |     |     |     |

| 93 [SLFZ] | O11 | O12 | N11 | N12 | O21 | O22 | N21 | N22 |
|-----------|-----|-----|-----|-----|-----|-----|-----|-----|
| H10       |     |     |     |     |     |     |     |     |
| H11       |     | +   |     |     |     |     |     |     |
| H17       |     |     |     |     | +   |     |     |     |
| H20       |     |     |     | +   | +   |     |     |     |
| H21       | -   |     |     |     |     |     |     |     |
| H27       |     |     |     |     |     |     |     |     |

| 94 [SLFZ] | O11 | O12 | N11 | N12 | O21 | O22 | N21 | N22 |
|-----------|-----|-----|-----|-----|-----|-----|-----|-----|
| H10       |     |     |     |     | +   |     |     |     |
| H11       |     | +   |     |     |     |     |     |     |
| H17       |     |     |     |     |     |     |     |     |
| H20       |     |     |     |     | -   |     |     |     |
| H21       |     |     |     |     |     | +   |     |     |
| H27       |     |     |     |     |     |     |     |     |

| 95 [SLFZ] | O11 | O12 | N11 | N12 |
|-----------|-----|-----|-----|-----|
| H10       |     |     |     |     |
| H11       |     | +   |     |     |
| H17       | -   |     |     | -   |

| 96 [SLFZ] <sup>-</sup> | O11 | O12 | N11 | N12 | N13 |
|------------------------|-----|-----|-----|-----|-----|
| H10                    | -   |     |     |     |     |
| H11                    |     |     |     |     | -   |

## S5. Summary of SLFZ molecule connectivity and networks

- Centroids of SLFZ molecules are geometric (not mass-weighted), based on all atoms, including H.
- H-bond definition: (1)  $d(D\cdots A) < (vdw(D) + vdw(A) + 0.50) \text{ \AA}$ ; (2)  $d(H\cdots A) < (vdw(H) + vdw(A)) \text{ \AA}$ ; (3)  $D-H\cdots A > 100^\circ$ .
- Net dimensions, point symbols and net symbols refer to connections between SFLZ molecules only**
- [+P] indicates that SLFZ also forms a hydrogen bond to/from a partner molecule

### Polymorphs (Total: 5)

|    | Space group | Mol Index 1555_XX |   | Centroid X | Centroid Y | Centroid Z | Connected SLFZ molecules                                    | Vertex Coord No. | Net Dim. | Point Symbol                                                         | Net Symbol |
|----|-------------|-------------------|---|------------|------------|------------|-------------------------------------------------------------|------------------|----------|----------------------------------------------------------------------|------------|
| 1p | P21/c       | 01                | R | 0.7561     | 0.7992     | 0.3688     | [1555.02] [4564.01] [4565.01] [2645.01] [2655.01] [3776.01] | 6                | 3D       | (4 <sup>4</sup> .5 <sup>3</sup> .6 <sup>7</sup> .7)                  | [unknown]  |
|    |             | 02                | R | 0.8066     | 0.2131     | 0.0481     | [1555.01] [2745.02] [2755.02] [3755.02]                     | 4                |          | (5 <sup>2</sup> .6 <sup>3</sup> .7)                                  |            |
| 2p | P21/n       | 01                | R | 0.7461     | 0.4793     | 0.6110     | [1555.02] [2646.01] [2646.02] [1655.02] [2656.01] [2656.02] | 6                | 2D       | (3 <sup>6</sup> .4 <sup>6</sup> .5 <sup>3</sup> )<br>[one node type] | hxl        |
|    |             | 02                | S | 0.2234     | 0.4496     | 0.8943     | [1555.01] [1455.01] [2546.02] [2556.02] [2646.01] [2656.01] | 6                |          |                                                                      |            |
| 3p | P21/c       | 01                | R | 0.7272     | 0.2737     | 0.9869     | [1555.02] [1545.02] [2646.02] [3767.02]                     | 4                | 2D       | (4 <sup>4</sup> .6 <sup>2</sup> )<br>[one node type]                 | sql        |
|    |             | 02                | R | 0.7807     | 0.7848     | 0.7766     | [1555.01] [1565.01] [2656.01] [3767.01]                     | 4                |          |                                                                      |            |
| 4p | P21/c       | 01                | R | 0.0515     | 0.7261     | 0.3686     | [2555.01] [1455.01] [2545.01] [1655.01]                     | 4                | 2D       | (4 <sup>4</sup> .6 <sup>2</sup> )                                    | sql        |
| 5p | P21/n       | 01                | R | 0.3948     | 0.7109     | 0.8431     | [4465.01] [2546.01] [2556.01] [4564.01]                     | 4                | 2D       | (4 <sup>4</sup> .6 <sup>2</sup> )                                    | sql        |

#### Polymorph 1, molecule 01 only (deleting molecule 02 from the structure)

|    |       |    |   |        |        |        |                                                   |   |    |                                   |     |
|----|-------|----|---|--------|--------|--------|---------------------------------------------------|---|----|-----------------------------------|-----|
| 1p | P21/c | 01 | R | 0.7561 | 0.7992 | 0.3688 | [4564.01] [4565.01] [2645.01] [2655.01] [3776.01] | 5 | 3D | (4 <sup>4</sup> .6 <sup>6</sup> ) | nov |
|----|-------|----|---|--------|--------|--------|---------------------------------------------------|---|----|-----------------------------------|-----|

#### Polymorph 01, molecule 02 only (deleting molecule 01 from the structure)

|    |       |    |   |        |        |        |                               |   |    |                   |     |
|----|-------|----|---|--------|--------|--------|-------------------------------|---|----|-------------------|-----|
| 1p | P21/c | 02 | R | 0.8066 | 0.2131 | 0.0481 | [2745.02] [2755.02] [3755.02] | 3 | 2D | (6 <sup>3</sup> ) | hcb |
|----|-------|----|---|--------|--------|--------|-------------------------------|---|----|-------------------|-----|

## S5. Summary of SLFZ molecule connectivity and networks

- Centroids of SLFZ molecules are geometric (not mass-weighted), based on all atoms, including H.
- H-bond definition: (1)  $d(D\cdots A) < (vdw(D) + vdw(A) + 0.50) \text{ \AA}$ ; (2)  $d(H\cdots A) < (vdw(H) + vdw(A)) \text{ \AA}$ ; (3)  $D-H\cdots A > 100^\circ$ .
- Net dimensions, point symbols and net symbols refer to connections between SFLZ molecules only**
- [+P] indicates that SLFZ also forms a hydrogen bond to/from a partner molecule

### Co-crystals (Total: 63)

|    | Space group | Mol Index 1555_XX |   | Centroid X | Centroid Y | Centroid Z | Connected SLFZ molecules                                    | Vertex Coord No. | Net Dim. | Point Symbol                | Net Symbol |
|----|-------------|-------------------|---|------------|------------|------------|-------------------------------------------------------------|------------------|----------|-----------------------------|------------|
| 1  | P-1         | 01                | R | 0.4052     | 0.2079     | 0.8001     | [1555.02] [1455.02] [2566.02] [2657.01] [2666.02]           | 5                | 2D       | $(4^6 \cdot 6^4)$           | [unknown]  |
|    |             | 02                | R | 0.4312     | 0.7538     | 0.5957     | [1555.01] [2566.01] [1655.01] [2666.01] [+P]                | 4 [+1]           |          | $(4^6)$                     |            |
| 2  | P21         | 01                | R | 0.6852     | 0.1458     | 0.6981     | [1455.01] [2646.01] [1655.01] [2656.01] [+P] [+P]           | 4 [+2]           | 2D       | $(4^4 \cdot 6^2)$           | sql        |
| 3  | Pc          | 01                | R | 0.5346     | 0.3843     | 0.4393     | [1555.02] [1455.01] [2464.01] [1655.01] [2665.01] [+P]      | 5 [+1]           | 3D       | $(4^6 \cdot 6^4)$           | bnn        |
|    |             | 02                | R | 0.4795     | 0.1493     | 0.8057     | [1555.01] [2454.02] [1455.02] [1655.02] [2655.02]           | 5                |          | [one node type]             |            |
| 4  | Cc          | 01                | R | 0.6061     | 0.8578     | 0.7320     | [1555.02] [3455.02] [4465.02] [3556.02] [4565.02]           | 5                | 3D       | $(4^4 \cdot 6^6)$           | [unknown]  |
|    |             | 02                | R | 0.6024     | 0.6359     | 0.2832     | [1555.01] [3444.01] [4464.01] [3545.01] [4564.01]           | 5                |          | [one node type]             |            |
| 5  | P21/c       | 01                | R | 0.2042     | 0.6423     | 0.0863     | [1455.01] [1655.01] [3665.01] [+P]                          | 3 [+1]           | 1D       | $(4^2 \cdot 6)$             | [ladder]   |
| 6  | P21/c       | 01                | R | 0.1854     | 0.3984     | 0.2771     | [4454.01] [1455.01] [3565.01] [1655.01] [4655.01]           | 5                | 3D       | $(4^6 \cdot 6^4)$           | bnn        |
| 7  | P21/c       | 01                | R | 0.8685     | 0.8273     | 0.4721     | [1455.01] [1655.01] [3776.01] [+P]                          | 3 [+1]           | 1D       | $(4^2 \cdot 6)$             | [ladder]   |
| 8  | P21/n       | 01                | R | 0.3361     | 0.1604     | 0.5456     | [1455.01] [4455.01] [4554.01] [1655.01] [3656.01]           | 5                | 3D       | $(4^6 \cdot 6^4)$           | bnn        |
| 9  | P21/n       | 01                | R | 0.6526     | 0.6524     | 0.8792     | [2646.01] [2656.01] [3667.01] [+P]                          | 3 [+1]           | 2D       | $(6^3)$                     | hcb        |
| 10 | P21/n       | 01                | R | 0.1213     | 0.3553     | 0.1873     | [4555.01] [4454.01] [1455.01] [4455.01] [4554.01] [1655.01] | 6                | 2D       | $(3^6 \cdot 4^6 \cdot 5^3)$ | hxl        |
| 11 | P21/n       | 01                | R | 0.3702     | 0.1571     | 0.5487     | [1455.01] [4455.01] [4554.01] [1655.01] [3656.01]           | 5                | 3D       | $(4^6 \cdot 6^4)$           | bnn        |
| 12 | P21/n       | 01                | R | 0.3876     | 0.1590     | 0.5641     | [1455.01] [4455.01] [4554.01] [1655.01] [3656.01]           | 5                | 3D       | $(4^6 \cdot 6^4)$           | bnn        |
| 13 | P21/n       | 01                | R | 0.3634     | 0.1550     | 0.5687     | [1455.01] [4455.01] [4554.01] [1655.01] [3656.01]           | 5                | 3D       | $(4^6 \cdot 6^4)$           | bnn        |
| 14 | P21/n       | 01                | R | 0.3255     | 0.1523     | 0.5762     | [1455.01] [4455.01] [4554.01] [1655.01] [3656.01]           | 5                | 3D       | $(4^6 \cdot 6^4)$           | bnn        |
| 15 | P21/n       | 01                | R | 0.3184     | 0.8438     | 0.4569     | [1455.01] [4464.01] [4565.01] [1655.01] [3676.01]           | 5                | 3D       | $(4^6 \cdot 6^4)$           | bnn        |
| 16 | P21/n       | 01                | R | 0.3855     | 0.6541     | 0.1344     | [2555.01] [2545.01] [2645.01] [2655.01] [3665.01]           | 5                | 3D       | $(4^4 \cdot 6^6)$           | sqp        |
| 17 | P21/n       | 01                | R | 0.3876     | 0.6550     | 0.1362     | [2555.01] [2545.01] [2645.01] [2655.01] [3665.01]           | 5                | 3D       | $(4^4 \cdot 6^6)$           | sqp        |

## S5. Summary of SLFZ molecule connectivity and networks

- Centroids of SLFZ molecules are geometric (not mass-weighted), based on all atoms, including H.
- H-bond definition: (1)  $d(D\cdots A) < (vdw(D) + vdw(A) + 0.50) \text{ \AA}$ ; (2)  $d(H\cdots A) < (vdw(H) + vdw(A)) \text{ \AA}$ ; (3)  $D-H\cdots A > 100^\circ$ .
- Net dimensions, point symbols and net symbols refer to connections between SFLZ molecules only**
- [+P] indicates that SLFZ also forms a hydrogen bond to/from a partner molecule

### Co-crystals (Total: 63)

|    | Space group | Mol Index<br>1555_XX |   | Centroid X | Centroid Y | Centroid Z | Connected SLFZ molecules                                    | Vertex Coord No. | Net Dim. | Point Symbol                                         | Net Symbol |
|----|-------------|----------------------|---|------------|------------|------------|-------------------------------------------------------------|------------------|----------|------------------------------------------------------|------------|
| 18 | P21/n       | 01                   | R | 0.3874     | 0.1587     | 0.5516     | [1455.01] [4455.01] [4554.01] [1655.01] [3656.01]           | 5                | 3D       | (4 <sup>6</sup> .6 <sup>4</sup> )                    | <b>bnn</b> |
| 19 | P21/n       | 01                   | R | 0.3867     | 0.6251     | 0.1453     | [2555.01] [2545.01] [2645.01] [2655.01] [3665.01]           | 5                | 3D       | (4 <sup>4</sup> .6 <sup>6</sup> )                    | <b>sqp</b> |
| 20 | P21/n       | 01                   | R | 0.1197     | 0.6038     | 0.8759     | [1555.02] [1455.01] [4465.02] [3567.01] [1655.01] [2656.02] | 6                | 3D       | (4 <sup>9</sup> .6 <sup>6</sup> )                    | [unknown]  |
|    |             | 02                   | S | 0.5747     | 0.5141     | 0.6190     | [1555.01] [1455.02] [4564.01] [2646.01] [1655.02]           | 5                |          | (4 <sup>7</sup> .6 <sup>3</sup> )                    |            |
| 21 | P21/n       | 01                   | R | 0.3882     | 0.1596     | 0.5423     | [1455.01] [4455.01] [4554.01] [1655.01] [3656.01]           | 5                | 3D       | (4 <sup>6</sup> .6 <sup>4</sup> )                    | <b>bnn</b> |
| 22 | P21/n       | 01                   | R | 0.3537     | 0.1597     | 0.5549     | [1455.01] [4455.01] [4554.01] [1655.01] [3656.01]           | 5                | 3D       | (4 <sup>6</sup> .6 <sup>4</sup> )                    | <b>bnn</b> |
| 23 | P21/n       | 01                   | R | 0.7981     | 0.1697     | 0.8802     | [1555.02] [2646.01] [1655.02] [2656.01] [3757.01]           | 5                | 3D       | (4 <sup>4</sup> .6 <sup>6</sup> )                    | [unknown]  |
|    |             | 02                   | S | 0.3898     | 0.3029     | 0.8938     | [1555.01] [1455.01] [2546.02] [2556.02] [+P]                | 4 [+1]           |          | (4 <sup>4</sup> .6 <sup>2</sup> )                    |            |
| 24 | C2/c        | 01                   | R | 0.6072     | 0.7331     | 0.4223     | [4564.01] [4565.01] [3676.01] [+P] [+P]                     | 3 [+2]           | 2D       | (6 <sup>3</sup> )                                    | <b>hcb</b> |
| 25 | P212121     | 01                   | R | 0.4842     | 0.3850     | 0.3467     | [1555.02] [3556.02] [3566.02] [4645.01] [4655.01]           | 5                | 3D       | (4 <sup>4</sup> .6 <sup>6</sup> )<br>[one node type] | <b>noz</b> |
|    |             | 02                   | S | 0.5047     | 0.6287     | 0.6388     | [1555.01] [3456.01] [3466.01] [4646.02] [4656.02]           | 5                |          |                                                      |            |
| 26 | Aba2        | 01                   | R | 0.1441     | 0.8820     | 0.2637     | [2575.01] [+P] [+P]                                         | 1 [+2]           | 0D       | —                                                    | —          |
| 27 | Pbca        | 01                   | R | 0.3756     | 0.7021     | 0.4303     | [5666.01] [+P] [+P] [+P]                                    | 1 [+3]           | 0D       | —                                                    | —          |
| 28 | P21/n       | 01                   | R | 0.4128     | 0.1558     | 0.5665     | [1455.01] [4455.01] [4554.01] [1655.01] [3656.01]           | 5                | 3D       | (4 <sup>6</sup> .6 <sup>4</sup> )                    | <b>bnn</b> |
| 29 | P21/n       | 01                   | R | 0.3707     | 0.1535     | 0.5756     | [1455.01] [4455.01] [4554.01] [1655.01] [3656.01]           | 5                | 3D       | (4 <sup>6</sup> .6 <sup>4</sup> )                    | <b>bnn</b> |
| 30 | P21/n       | 01                   | R | 0.3704     | 0.1594     | 0.5702     | [1455.01] [4455.01] [4554.01] [1655.01] [3656.01]           | 5                | 3D       | (4 <sup>6</sup> .6 <sup>4</sup> )                    | <b>bnn</b> |
| 31 | P21/n       | 01                   | R | 0.3966     | 0.1554     | 0.5637     | [1455.01] [4455.01] [4554.01] [1655.01] [3656.01]           | 5                | 3D       | (4 <sup>6</sup> .6 <sup>4</sup> )                    | <b>bnn</b> |
| 32 | P21/n       | 01                   | R | 0.3469     | 0.1567     | 0.5811     | [1455.01] [4455.01] [4554.01] [1655.01] [3656.01]           | 5                | 3D       | (4 <sup>6</sup> .6 <sup>4</sup> )                    | <b>bnn</b> |
| 33 | P21/n       | 01                   | R | 0.3531     | 0.1654     | 0.5476     | [1455.01] [4455.01] [4554.01] [1655.01] [3656.01]           | 5                | 3D       | (4 <sup>6</sup> .6 <sup>4</sup> )                    | <b>bnn</b> |
| 34 | P21/n       | 01                   | R | 0.3637     | 0.1746     | 0.5251     | [1455.01] [4455.01] [4554.01] [1655.01] [3656.01]           | 5                | 3D       | (4 <sup>6</sup> .6 <sup>4</sup> )                    | <b>bnn</b> |

## S5. Summary of SLFZ molecule connectivity and networks

- Centroids of SLFZ molecules are geometric (not mass-weighted), based on all atoms, including H.
- H-bond definition: (1)  $d(D\cdots A) < (vdw(D) + vdw(A) + 0.50) \text{ \AA}$ ; (2)  $d(H\cdots A) < (vdw(H) + vdw(A)) \text{ \AA}$ ; (3)  $D-H\cdots A > 100^\circ$ .
- Net dimensions, point symbols and net symbols refer to connections between SFLZ molecules only**
- [+P] indicates that SLFZ also forms a hydrogen bond to/from a partner molecule

### Co-crystals (Total: 63)

|    | Space group                                   | Mol Index 1555_XX |   | Centroid X | Centroid Y | Centroid Z | Connected SLFZ molecules                               | Vertex Coord No. | Net Dim. | Point Symbol                                   | Net Symbol |
|----|-----------------------------------------------|-------------------|---|------------|------------|------------|--------------------------------------------------------|------------------|----------|------------------------------------------------|------------|
| 35 | P21<br>SLFZ only = P21/n                      | 01                | R | 0.3655     | 0.1559     | 0.5717     | [1555.02] [1455.01] [2556.02] [1655.01] [2655.02]      | 5                | 3D       | $(4^6 \cdot 6^4)$<br>[one node type]           | bnn        |
|    |                                               | 02                | S | 0.6447     | -0.1547    | 0.4314     | [1555.01] [1455.02] [2546.01] [2645.01] [1655.02]      | 5                |          |                                                |            |
| 36 | P21/c                                         | 01                | R | 0.6925     | 0.6284     | 0.4158     | [1455.01] [4464.01] [4665.01] [1655.01] [3766.01] [+P] | 5 [+1]           | 3D       | $(4^6 \cdot 6^4)$                              | bnn        |
| 37 | P21/c                                         | 01                | R | 0.8280     | 0.8256     | 0.4327     | [1455.01] [1655.01] [3776.01] [+P]                     | 3 [+1]           | 1D       | $(4^2 \cdot 6)$                                | [ladder]   |
| 38 | P21/c                                         | 01                | R | 0.2645     | 0.4202     | 0.1526     | [1455.01] [1655.01] [3665.01] [+P]                     | 3 [+1]           | 1D       | $(4^2 \cdot 6)$                                | [ladder]   |
| 39 | Pbca                                          | 01                | R | 0.5601     | 0.7022     | 0.8035     | [7555.01] [1555.02] [7545.01] [4646.01] [4656.01]      | 5                | 3D       | $(4^4 \cdot 6^6)$<br>$(4^4 \cdot 6^5 \cdot 8)$ | [unknown]  |
|    |                                               | 02                | R | 0.5580     | 0.6687     | 0.9519     | [1555.01] [3467.02] [3567.02] [7645.02] [7655.02]      | 5                |          |                                                |            |
| 40 | Pbca                                          | 01                | R | 0.5556     | 0.7023     | 0.8025     | [7555.01] [1555.02] [7545.01] [4646.01] [4656.01]      | 5                | 3D       | $(4^4 \cdot 6^6)$<br>$(4^4 \cdot 6^5 \cdot 8)$ | [unknown]  |
|    |                                               | 02                | R | 0.5708     | 0.6715     | 0.9516     | [1555.01] [3467.02] [3567.02] [7645.02] [7655.02]      | 5                |          |                                                |            |
| 41 | P21/c<br>SLFZ only =<br>P21/n in smaller cell | 01                | R | 0.9055     | 0.1596     | 0.9527     | [1555.02] [4555.02] [4655.02] [1656.02] [3757.01]      | 5                | 3D       | $(4^6 \cdot 6^4)$<br>[one node type]           | bnn        |
|    |                                               | 02                | R | 0.4295     | 0.1585     | 0.4659     | [1555.01] [1454.01] [4454.01] [4554.01] [3656.02]      | 5                |          |                                                |            |
| 42 | P21/c                                         | 01                | R | 0.5137     | 0.3011     | 0.3895     | [1455.01] [2645.01] [1655.01] [2655.01] [+P]           | 4 [+1]           | 2D       | $(4^4 \cdot 6^2)$                              | sql        |
| 43 | P43<br>Inverted wrt ADEDIX02 (P41)            | 01                | R | 0.2244     | 0.8556     | 0.1884     | [1545.01] [1565.01] [4565.01] [2654.01] [+P]           | 4 [+1]           | 3D       | $(6^5 \cdot 8)$                                | cds        |
| 44 | P21/c                                         | 01                | R | 0.8035     | 0.5458     | 0.6326     | [4564.01] [4565.01] [3666.01] [2746.01] [2756.01]      | 5                | 3D       | $(4^4 \cdot 6^6)$                              | nov        |
| 45 | P-1                                           | 01                | R | 0.7707     | 0.6571     | 0.2511     | [1555.02] [+P] [+P]                                    | 1 [+2]           | 0D       | —                                              | —          |
|    |                                               | 02                | R | 0.2871     | 0.7528     | 0.3388     | [1555.01] [+P] [+P]                                    | 1 [+2]           |          |                                                |            |
| 46 | P21/n                                         | 01                | R | 0.1344     | 0.2002     | 0.3872     | [2555.01] [2445.01] [2455.01] [2545.01] [3556.01]      | 5                | 3D       | $(4^4 \cdot 6^6)$                              | sqp        |
| 47 | Pbca                                          | 01                | R | 0.4932     | 0.3827     | 0.3521     | [4645.01] [7645.01] [4655.01] [7655.01] [5666.01]      | 5                | 3D       | $(4^4 \cdot 6^6)$                              | noz        |
| 48 | P21/n                                         | 01                | R | 0.0524     | 0.8231     | 0.4178     | [1455.01] [4465.01] [4564.01] [1655.01] [+P]           | 4 [+1]           | 2D       | $(4^4 \cdot 6^2)$                              | sql        |

## S5. Summary of SLFZ molecule connectivity and networks

- Centroids of SLFZ molecules are geometric (not mass-weighted), based on all atoms, including H.
- H-bond definition: (1)  $d(D\cdots A) < (vdw(D) + vdw(A) + 0.50) \text{ \AA}$ ; (2)  $d(H\cdots A) < (vdw(H) + vdw(A)) \text{ \AA}$ ; (3)  $D-H\cdots A > 100^\circ$ .
- Net dimensions, point symbols and net symbols refer to connections between SFLZ molecules only**
- [+P] indicates that SLFZ also forms a hydrogen bond to/from a partner molecule

### Co-crystals (Total: 63)

|    | Space group | Mol Index 1555_XX |   | Centroid X | Centroid Y | Centroid Z | Connected SLFZ molecules                                    | Vertex Coord No. | Net Dim. | Point Symbol                                           | Net Symbol |
|----|-------------|-------------------|---|------------|------------|------------|-------------------------------------------------------------|------------------|----------|--------------------------------------------------------|------------|
| 49 | P21/c       | 01                | R | 0.7426     | 0.1862     | 0.1835     | [4555.01] [4554.01] [2645.01] [2655.01] [+P] [+P] [+P]      | 4 [+3]           | 2D       | (4 <sup>4</sup> .6 <sup>2</sup> )                      | sql        |
| 50 | P21/n       | 01                | R | 0.2737     | 0.9065     | 0.1164     | [2555.01] [1455.01] [2545.01] [1655.01] [3675.01] [+P]      | 5 [+1]           | 3D       | (4 <sup>6</sup> .6 <sup>4</sup> )                      | bnn        |
| 51 | P21/n       | 01                | R | 0.9268     | 0.6037     | 0.7431     | [2746.01] [2756.01] [+P] [+P]                               | 2 [+2]           | 1D       | —                                                      | [zig-zag]  |
| 52 | P21/c       | 01                | R | 0.2590     | 0.4039     | 0.6327     | [1455.01] [1655.01] [3666.01] [+P]                          | 3 [+1]           | 1D       | (4 <sup>2</sup> .6)                                    | [ladder]   |
| 53 | P21/c       | 01                | R | 0.1959     | 0.1322     | 0.4407     | [3656.01] [+P] [+P]                                         | 1 [+2]           | 0D       | —                                                      | —          |
| 54 | P21/c       | 01                | R | 0.2188     | 0.4017     | 0.1777     | [3565.01] [+P] [+P]                                         | 1 [+2]           | 0D       | —                                                      | —          |
| 55 | P-1         | 01                | R | 0.2252     | 0.1192     | 1.0460     | [+P] [+P]                                                   | 0 [+2]           | —        | —                                                      | —          |
| 56 | P21/n       | 01                | R | 0.5898     | 0.3682     | 0.6642     | [1455.01] [4455.01] [4554.01] [1655.01] [+P] [+P] [+P]      | 4 [+3]           | 2D       | (4 <sup>4</sup> .6 <sup>2</sup> )                      | sql        |
| 57 | P21/n       | 01                | R | 0.6026     | 0.3693     | 0.6602     | [1455.01] [4455.01] [4554.01] [1655.01] [+P] [+P]           | 4 [+2]           | 2D       | (4 <sup>4</sup> .6 <sup>2</sup> )                      | sql        |
| 58 | P21/n       | 01                | R | 0.6003     | 0.3683     | 0.6603     | [1455.01] [4455.01] [4554.01] [1655.01] [+P] [+P]           | 4 [+2]           | 2D       | (4 <sup>4</sup> .6 <sup>2</sup> )                      | sql        |
| 59 | P21/n       | 01                | R | 0.5986     | 0.3691     | 0.6506     | [1455.01] [4455.01] [4554.01] [1655.01] [+P] [+P]           | 4 [+2]           | 2D       | (4 <sup>4</sup> .6 <sup>2</sup> )                      | sql        |
| 92 | P-1         | 01                | R | 0.5055     | 0.6673     | 0.7648     | [1455.01] [1655.01] [2677.01] [+P] [+P]                     | 3 [+2]           | 1D       | (4 <sup>2</sup> .6)                                    | [ladder]   |
| 93 | P-1         | 01                | R | 0.5343     | 0.8212     | 0.3987     | [1555.02] [1455.01] [1655.01] [1655.02] [2666.02] [+P]      | 5 [+1]           | 1D       | (3 <sup>3</sup> .4 <sup>6</sup> .5)<br>[one node type] | [tube]     |
|    |             | 02                | R | 0.4240     | 0.6658     | 0.8358     | [1555.01] [1455.01] [1455.02] [1655.02] [2666.01] [+P] [+P] | 5 [+2]           |          |                                                        |            |
| 94 | P21/n       | 01                | R | 0.3916     | 0.3956     | 0.9306     | [1555.02] [1455.01] [1655.01] [+P]                          | 3 [+1]           | 2D       | (4 <sup>2</sup> .6)                                    | [unknown]  |
|    |             | 02                | R | 1.0047     | 0.3005     | 0.3354     | [1555.01] [1455.02] [4455.02] [4554.02] [1655.02] [+P]      | 5 [+1]           |          | (4 <sup>6</sup> .6 <sup>4</sup> )                      |            |
| 95 | Pbca        | 01                | R | 0.6045     | 0.4041     | 0.5889     | [1545.01] [1565.01] [5666.01] [+P] [+P]                     | 3 [+2]           | 1D       | (4 <sup>2</sup> .6)                                    | [ladder]   |

## S5. Summary of SLFZ molecule connectivity and networks

- Centroids of SLFZ molecules are geometric (not mass-weighted), based on all atoms, including H.
- H-bond definition: (1)  $d(D\cdots A) < (vdw(D) + vdw(A) + 0.50) \text{ \AA}$ ; (2)  $d(H\cdots A) < (vdw(H) + vdw(A)) \text{ \AA}$ ; (3)  $D-H\cdots A > 100^\circ$ .
- Net dimensions, point symbols and net symbols refer to connections between SFLZ molecules only**
- [+P] indicates that SLFZ also forms a hydrogen bond to/from a partner molecule

### Salts (Total: 30)

|    | Space group | Mol Index 1555_XX |   | Centroid X | Centroid Y | Centroid Z | Connected SLFZ molecules                               | Vertex Coord No. | Net Dim. | Point Symbol                                         | Net Symbol |
|----|-------------|-------------------|---|------------|------------|------------|--------------------------------------------------------|------------------|----------|------------------------------------------------------|------------|
| 60 | Pna21       | 01                | R | 0.6445     | 0.8381     | 0.5772     | [3644.01] [3655.01] [2674.01] [2675.01] [+P]           | 4 [+1]           | 3D       | (6 <sup>5</sup> ·8)                                  | dmp        |
| 61 | Pna21       | 01                | R | 0.3997     | 0.3469     | 0.3684     | [3545.01] [3554.01] [2664.01] [2665.01] [+P]           | 4 [+1]           | 3D       | (6 <sup>5</sup> ·8)                                  | dmp        |
| 62 | P212121     | 01                | R | 0.2044     | 0.2572     | 0.3162     | [4555.01] [4545.01] [4645.01] [4655.01] [+P] [+P]      | 4 [+2]           | 2D       | (4 <sup>4</sup> ·6 <sup>2</sup> )                    | sql        |
| 63 | P212121     | 01                | R | 0.2001     | 0.2691     | 0.3180     | [4555.01] [4545.01] [4645.01] [4655.01] [+P] [+P]      | 4 [+2]           | 2D       | (4 <sup>4</sup> ·6 <sup>2</sup> )                    | sql        |
| 64 | Fdd2        | 01                | R | 0.3074     | 0.4368     | 0.5624     | [12555.01] [4454.01] [1554.01] [1556.01] [+P] [+P]     | 4 [+2]           | 2D       | (4 <sup>4</sup> ·6 <sup>2</sup> )                    | sql        |
| 65 | P21         | 01                | R | 0.6668     | 0.8420     | 0.4395     | [1555.02] [1565.02] [2646.01] [2656.01] [+P] [+P]      | 4 [+2]           | 2D       | (4 <sup>4</sup> ·6 <sup>2</sup> )<br>[one node type] | sql        |
|    |             | 02                | R | 0.3113     | 0.3231     | 0.0805     | [1555.01] [1545.01] [2645.02] [2655.02] [+P] [+P]      | 4 [+2]           |          |                                                      |            |
| 66 | P21/c       | 01                | R | 0.1193     | 0.8625     | 0.7004     | [4565.01] [4564.01] [2546.01] [2556.01] [+P] [+P] [+P] | 4 [+3]           | 2D       | (4 <sup>4</sup> ·6 <sup>2</sup> )                    | sql        |
| 67 | P21/c       | 01                | R | 0.0914     | 0.4719     | 0.6692     | [1555.02] [1545.01] [1565.01] [4565.02] [+P] [+P]      | 4 [+2]           | 2D       | (4 <sup>4</sup> ·6 <sup>2</sup> )<br>[one node type] | sql        |
|    |             | 02                | S | 0.4023     | 0.9766     | 0.5681     | [1555.01] [1545.02] [1565.02] [4564.01] [+P] [+P]      | 4 [+2]           |          |                                                      |            |
| 68 | C2/c        | 01                | R | 0.5389     | 0.7346     | 0.5353     | [7666.01] [3676.01] [+P] [+P] [+P]                     | 2 [+3]           | 1D       | —                                                    | [zig-zag]  |
| 69 | P212121     | 01                | R | 0.5452     | 0.5642     | 0.3903     | [1455.01] [4645.01] [1655.01] [4655.01] [+P] [+P]      | 4 [+2]           | 2D       | (4 <sup>4</sup> ·6 <sup>2</sup> )                    | sql        |
| 70 | P21/c       | 01                | R | 0.8360     | 0.5287     | 0.5691     | [1545.01] [1565.01] [3776.01] [+P] [+P] [+P]           | 3 [+3]           | 1D       | (4 <sup>2</sup> ·6)                                  | [ladder]   |
| 71 | C2/c        | 01                | R | 0.3837     | 0.4982     | 0.5869     | [3666.01] [+ N—H···F]                                  | 1<br>[+ N—H···F] | 0D       | —                                                    | —          |
| 72 | P212121     | 01                | R | 0.1911     | 0.2876     | 0.3449     | [4555.01] [4545.01] [4645.01] [4655.01] [+P]           | 4 [+1]           | 2D       | (4 <sup>4</sup> ·6 <sup>2</sup> )                    | sql        |
| 73 | P212121     | 01                | R | 0.5234     | 0.5544     | 0.3960     | [1455.01] [4645.01] [1655.01] [4655.01] [+P]           | 4 [+1]           | 2D       | (4 <sup>4</sup> ·6 <sup>2</sup> )                    | sql        |
| 74 | P-1         | 01                | R | 0.3129     | 0.3338     | 0.1730     | [+P] [+P] [+P] [+P] [+P]                               | 0 [+5]           | —        | —                                                    | —          |
| 75 | P21/c       | 01                | R | -0.1295    | 0.6115     | 0.1502     | [1455.01] [4464.01] [1655.01] [4665.01] [+P] [+P] [+P] | 4 [+3]           | 2D       | (4 <sup>4</sup> ·6 <sup>2</sup> )                    | sql        |
| 76 | P21/c       | 01                | R | 0.0511     | 0.7303     | 0.1311     | [4564.01] [4565.01] [+P] [+P] [+P]                     | 2 [+3]           | 1D       | —                                                    | [linear]   |
| 77 | P21/c       | 01                | R | 0.7578     | 0.5305     | 0.6129     | [3666.01] [+P] [+P] [+P]                               | 1 [+3]           | 0D       | —                                                    | —          |

## S5. Summary of SLFZ molecule connectivity and networks

- Centroids of SLFZ molecules are geometric (not mass-weighted), based on all atoms, including H.
- H-bond definition: (1)  $d(D\cdots A) < (vdw(D) + vdw(A) + 0.50) \text{ \AA}$ ; (2)  $d(H\cdots A) < (vdw(H) + vdw(A)) \text{ \AA}$ ; (3)  $D-H\cdots A > 100^\circ$ .
- Net dimensions, point symbols and net symbols refer to connections between SFLZ molecules only**
- [+P] indicates that SLFZ also forms a hydrogen bond to/from a partner molecule

### Salts (Total: 30)

|    | Space group                     | Mol Index<br>1555_XX |   | Centroid X | Centroid Y | Centroid Z | Connected SLFZ molecules                          | Vertex Coord No. | Net Dim. | Point Symbol                           | Net Symbol |
|----|---------------------------------|----------------------|---|------------|------------|------------|---------------------------------------------------|------------------|----------|----------------------------------------|------------|
| 78 | P21/c                           | 01                   | R | 0.2107     | 0.6386     | 0.3662     | [2555.01] [2545.01] [4564.01] [4565.01] [+P]      | 4 [+1]           | 2D       | (4 <sup>4</sup> ·6 <sup>2</sup> )      | sql        |
| 79 | P21/c                           | 01                   | R | 0.7460     | 0.5316     | 0.6074     | [3666.01] [+P] [+P] [+P] [+P]                     | 1 [+4]           | 0D       | —                                      | —          |
| 80 | P21/c                           | 01                   | R | 0.2218     | 0.2435     | 0.5565     | [1555.02] [1545.01] [3666.02] [+P] [+P] [+P]      | 3 [+3]           | 1D       | (4 <sup>2</sup> ·6)<br>[one node type] | [ladder]   |
|    |                                 | 02                   | R | 0.2934     | 0.7196     | 0.7023     | [1555.01] [1565.01] [3666.01] [+P] [+P]           | 3 [+2]           |          |                                        |            |
| 81 | P21/c                           | 01                   | R | 0.7962     | 0.2607     | 0.4827     | [4555.01] [4554.01] [+P] [+P] [+P] [+P]           | 2 [+4]           | 1D       | —                                      | [linear]   |
| 82 | P21/n                           | 01                   | R | 0.3678     | 0.3201     | 0.5715     | [4555.01] [4454.01] [2546.01] [2556.01] [+P] [+P] | 4 [+2]           | 2D       | (4 <sup>4</sup> ·6 <sup>2</sup> )      | sql        |
| 83 | P21/n                           | 01                   | R | 0.8503     | 0.4097     | 0.5663     | [1545.01] [1565.01] [1555.02] [+P] [+P] [+P] [+P] | 3 [+4]           | 1D       | (4 <sup>2</sup> ·6)<br>[one node type] | [ladder]   |
|    |                                 | 02                   | R | 0.5779     | 0.5844     | 0.3003     | [1545.02] [1565.02] [1555.01] [+P] [+P] [+P] [+P] | 3 [+4]           |          |                                        |            |
| 84 | P21/c                           | 01                   | R | 0.4597     | 0.3989     | 0.1873     | [1455.01] [2645.01] [1655.01] [2655.01] [+ N—H⋯F] | 4<br>[+ N—H⋯F]   | 2D       | (4 <sup>4</sup> ·6 <sup>2</sup> )      | sql        |
| 85 | Cc<br>[from C2/c,<br>Z' = 1]    | 01                   | R | 0.3828     | 0.4878     | 0.5856     | [1555.02] [+P] [+P] [+P] [+P]                     | 1 [+4]           | 0D       | —                                      | —          |
|    |                                 | 02                   | S | 0.6165     | 0.5066     | 0.4159     | [1555.01] [+P] [+P] [+P] [+P]                     | 1 [+4]           |          |                                        |            |
| 86 | Pna21<br>[from Pbcn,<br>Z' = 1] | 01                   | R | 0.5558     | 0.7324     | 0.3473     | [1545.01] [1565.01] [+P] [+P] [+P]                | 2 [+3]           | 1D       | —                                      | [linear]   |
|    |                                 | 02                   | R | 0.9459     | 0.7372     | 0.6523     | [1545.02] [1565.02] [+P] [+P] [+P]                | 2 [+3]           | 1D       | —                                      | [linear]   |
| 87 | P21/n                           | 01                   | R | 0.0975     | 0.8760     | 0.4234     | [3576.01] [+P] [+P] [+P] [+P]                     | 1 [+4]           | 0D       | —                                      | —          |
| 88 | P21/c                           | 01                   | R | 0.2056     | 0.8747     | 0.7195     | [2646.01] [2656.01] [+P] [+P] [+P]                | 2 [+3]           | 1D       | —                                      | [zig-zag]  |
| 96 | P-1                             | 01                   | R | 0.7521     | 0.7747     | 0.9334     | [2767.01] [2777.01] [+P] [+P] [+P] [+P] [+P]      | 2 [+5]           | 1D       | —                                      | [zig-zag]  |



## S5. Summary of SLFZ molecule connectivity and networks

- Centroids of SLFZ molecules are geometric (not mass-weighted), based on all atoms, including H.
- H-bond definition: (1)  $d(D\cdots A) < (vdw(D) + vdw(A) + 0.50) \text{ \AA}$ ; (2)  $d(H\cdots A) < (vdw(H) + vdw(A)) \text{ \AA}$ ; (3)  $D-H\cdots A > 100^\circ$ .
- **Net dimensions, point symbols and net symbols refer to connections between SFLZ molecules only**
- [+P] indicates that SLFZ also forms a hydrogen bond to/from a partner molecule

### Other (Total: 3)

|    | Space group                              | Mol Index<br>1555_XX |   | Centroid X | Centroid Y | Centroid Z | Connected molecules                               | Vertex<br>Coord No.           | Net<br>Dim. | Point Symbol                         | Net Symbol |
|----|------------------------------------------|----------------------|---|------------|------------|------------|---------------------------------------------------|-------------------------------|-------------|--------------------------------------|------------|
| 89 | P21<br>[SLFZ approximates P21/a, z' = 2] | 01                   | R | 0.5547     | 0.4991     | 0.5301     | [1555.02] [1555.04] [2646.01] [1655.02] [2656.01] | 5                             | 3D          | $(4^6 \cdot 6^4)$<br>[one node type] | bnn        |
|    |                                          | 02                   | S | 0.0632     | 0.2789     | 0.5285     | [1555.01] [1555.03] [1455.01] [2546.02] [2556.02] | 5                             |             |                                      |            |
|    |                                          | 03                   | R | 0.4160     | 0.4781     | 0.9631     | [1555.02] [1555.04] [1455.04] [2647.03] [2657.03] | 5                             |             |                                      |            |
|    |                                          | 04                   | S | 0.9187     | 0.2890     | 0.9658     | [1555.01] [1555.03] [1655.03] [2747.04] [2757.04] | 5                             |             |                                      |            |
| 90 | P-1                                      | 01                   | R | 0.0106     | 0.7458     | 0.4458     | [1455.01] [2566.01] [1655.01] [+P] [+P] [+P]      | 3 [+3]                        | 1D          | $(4^2 \cdot 6)$                      | [ladder]   |
| 91 | P21/n                                    | 01                   | R | 0.2041     | 0.1962     | 0.2205     | [+P] [+P] [+ N—H $\cdots$ Cl]                     | 0 [+2]<br>[+ N—H $\cdots$ Cl] | —           | —                                    | —          |

## S6. Node shape comparisons

The node shape comparisons are based on nets formed between SLFZ molecules only. The points in the node shape comprise the geometrical centroids of the SLFZ molecule, with connections as listed in S5. For crystal structures containing more than one independent SLFZ molecule, a separate node is extracted for each molecule. These are appended with “\_01”, “\_02”, etc. Comparisons are limited to nodes comprising a minimum of 4 points (*i.e.* 3-coordinate SLFZ) and the maximum number of points is 7 (*i.e.* 6-coordinate SLFZ). The full results set is a 103 vs 103 array of “Continuous Shape Measure” (CShM) values, provided as a separate Excel worksheet. Sub-matrices are also provided for specific comparison of all nodes having the same coordination number (3–6). The full matrix also contains comparisons of nodes with different coordination numbers, as described in the main text.

Comparison of two node shapes is made as described in the main text. For each node shape, the points are converted to Cartesian axes and moved so that the centroid of the entire shape (not necessarily coinciding with the central point of the node shape) is at the origin of the coordinate system. The total RMS distance of all points from the origin is calculated, and the shape is scaled by dividing each origin-point distance by that value. Hence, each node shape is scaled so that the RMS distance of all of its points from the origin is unity. Scaled node shapes are then overlaid using the Kabsch algorithm (best rigid-body overlay), and the CShM value is calculated as described in the main text. Since the Kabsch algorithm requires the points in the two shapes to be mapped, it is necessary to consider all possible mappings to identify the best overlay of two node shapes. Since the number of points in the node shapes is small, all permutations were systematically tested and the best one was kept.

The core calculation method (including the specified scaling procedure) was validated by comparing to the following webpage:

Tuvi-Arad, G. Alon and D. Avnir, CoSyM, <http://csm.ouproj.org.il>.

This page provides a facility to compare to standard shapes such as the regular tetrahedron, trigonal bipyramid, octahedron, etc. Dummy node shapes with regular geometry were constructed for testing, and it was confirmed that comparison of the scaled node shapes to the standard models produced CShM values matching those produced by the webpage.
